# Supplementary material for: The Absence of N-Acetyl-D-glucosamine Causes Attenuation of Virulence of Candida albicans upon Interaction with Vaginal Epithelial Cells In Vitro
Source: Biomed Res Int. 2015 Aug 20;2015:398045. doi: 10.1155/2015/398045 (PMC4558442; doi:10.1155/2015/398045)
Supplement: Supplementary file 1 — RNA seq data was analyzed and differentially expressed genes between the C.a.3h vs. C.a.0h, PK+C.a.3h vs. C.a.0h and PK+C.a.3h vs. C.a.3h samples were listed. Since the hyphal form of C. albicans is pathogenic, genes with altered expression upon hyphal growth were collected. Our gene expression analysis revealed that the expression of genes involved in the glyoxylate cycle and fatty acid beta-oxidation in C. albicans were upregulated. [file 398045.f1.zip › sup/BMRI Manczinger et al Table S1.xls]

## Sheet: C. a. 0h - C. a. 3h
ORF name	Gene Symbol	Read Count		Fold Change of expression
		0ca	3ca
orf19.10	ALK8	22	10	-2.53286
orf19.1030		5	118	16.6502
orf19.1031	HMG1	24	85	3.04469
orf19.1033	STR2	29	83	2.16279
orf19.1035	WAR1	16	68	3.12275
orf19.1047	ERB1	4	72	4.36846
orf19.1064	ACS2	135	952	5.25981
orf19.1065	SSA2	104	316	2.59495
orf19.107		8	29	5.00093
orf19.1075.1		7	55	4.37582
orf19.1077	ATM1	12	63	3.83556
orf19.1086		31	85	2.70214
orf19.1091	NOP8	0	37	10.7939
orf19.1093	FLO8	34	116	2.78764
orf19.1095	GLE2	1	19	2.09598
orf19.1105.2	PGA56	6	45	5.25833
orf19.111	CAN2	108	392	3.07608
orf19.1119	MTR1	18	47	2.48996
orf19.1120	FAV2	0	7	13.2378
orf19.113	CIP1	5	43	8.82518
orf19.1139		36	141	3.19311
orf19.1142	AVT4	8	45	3.26532
orf19.1144		74	34	-2.06718
orf19.1150		7	25	2.52583
orf19.1152		8	0	-10.6298
orf19.118	FAD2	33	145	2.9094
orf19.1192	DNA2	11	33	2.42692
orf19.1195		19	99	4.4527
orf19.1199	NOP5	12	90	7.23281
orf19.1215		0	7	2.94173
orf19.1217		12	46	3.07544
orf19.1219		3	20	2.39134
orf19.1223	DBF2	60	28	-2.1596
orf19.1224	FRP3	234	962	2.96631
orf19.1229		19	69	3.01764
orf19.1232	VRG4	8	78	2.64755
orf19.1233	ADE4	15	181	10.1749
orf19.1235	HOM3	6	44	5.81423
orf19.1240		127	313	2.35741
orf19.1253	PHO4	5	75	14.3724
orf19.1259		26	143	3.30944
orf19.1264	CFL2	7	56	6.37374
orf19.1272		6	23	4.9421
orf19.1275	GAT1	5	35	4.70676
orf19.1281		0	9	11.7323
orf19.1285		19	44	2.16359
orf19.1287		10	37	3.42625
orf19.1295	VAS1	61	334	3.58675
orf19.1308		0	21	7.81659
orf19.1321	HWP1	644	1479	2.02709
orf19.1324	RAD2	17	66	4.41259
orf19.1325	ECM38	9	88	9.74447
orf19.1327	RBT1	10	51	4.14104
orf19.1331	HSM3	49	20	-2.00067
orf19.1333	SNG3	11	45	3.26532
orf19.1335		17	196	6.12571
orf19.1342	SHM1	0	12	9.47545
orf19.135	EXO84	2	14	3.16668
orf19.1357	FCY21	29	84	2.52789
orf19.1358	GCN4	67	593	7.17913
orf19.136		5	35	5.95699
orf19.1362	SMM1	3	21	9.32947
orf19.1363		43	119	2.18561
orf19.1368		44	19	-2.50231
orf19.1381		21	4	-9.67512
orf19.1383		1	8	3.7507
orf19.1393		10	3	-2.1246
orf19.1394		6	52	6.7292
orf19.1397		3	13	3.82424
orf19.1401	EAP1	22	317	11.9875
orf19.1402	CCT2	45	119	2.06395
orf19.1404		1	8	8.44695
orf19.1409.1		19	94	3.93456
orf19.1415	FRE1	3	20	3.19913
orf19.1416	COX11	0	7	5.1186
orf19.1422	FZO1	19	86	5.60658
orf19.1426		7	58	3.84778
orf19.1441		15	108	5.87628
orf19.1446	CLB2	64	27	-2.26624
orf19.1447		0	6	3.90829
orf19.1461		1	19	34.8594
orf19.1486		12	28	2.01395
orf19.1492	PRP39	0	16	22.9455
orf19.1494	RAD23	13	36	3.40092
orf19.1495		6	0	-2.71949
orf19.1499	CTF1	20	71	2.11471
orf19.1505		23	63	2.42692
orf19.1509	ROD1	17	61	3.03126
orf19.151	TPO5	2	22	23.828
orf19.1517	ARO3	4	47	8.82518
orf19.1519		12	35	3.33822
orf19.1522		52	23	-2.94612
orf19.1523	FMO1	8	71	7.35431
orf19.1531		16	39	2.51178
orf19.1533		3	35	3.24767
orf19.1536		8	49	4.57305
orf19.1542	HEX3	26	118	3.9125
orf19.1555	SAC3	31	60	2.13096
orf19.1565		3	12	3.87327
orf19.1566	UTP21	8	94	10.0509
orf19.1569	UTP22	21	178	6.07957
orf19.1570	ERG7	38	23	-2.14821
orf19.1573		50	121	2.25672
orf19.1576		5	21	3.86627
orf19.1578		25	471	16.7946
orf19.158		9	71	3.60361
orf19.1585	ZRT2	3	23	3.19913
orf19.1604		15	52	3.53007
orf19.1609		2	23	11.963
orf19.1613	ILV2	41	334	7.49417
orf19.1614	MEP1	47	176	3.15392
orf19.1616	FGR23	3	17	4.41259
orf19.1617		15	200	10.5412
orf19.1621	GPA2	22	46	2.93307
orf19.1638		9	27	2.55466
orf19.164		3	17	2.42692
orf19.1646		4	43	5.40542
orf19.1652	POX1-3	805	212	-3.33678
orf19.1655	PXP2	236	51	-4.08771
orf19.1656		8	52	4.07316
orf19.1659	ALG8	0	12	11.4727
orf19.1662		1	16	19.4154
orf19.1663	MNT2	8	34	3.6319
orf19.1665	MNT1	255	644	2.27355
orf19.1666		3	51	6.33808
orf19.1667		13	38	2.68958
orf19.1669	AFG3	36	103	2.13841
orf19.1687		13	198	11.2405
orf19.169	CHO2	16	88	5.13465
orf19.1693	CAS4	63	430	5.59282
orf19.1699	BZZ1	10	26	4.42956
orf19.1704	FOX3	71	34	-2.23894
orf19.1706	MET18	6	21	3.47816
orf19.171	DBP2	19	395	14.7593
orf19.1715	IRO1	23	54	2.50047
orf19.1718	ZCF8	4	30	3.53007
orf19.1719	SGA1	9	26	2.29455
orf19.1725		3	14	6.17762
orf19.1734		55	113	2.01909
orf19.1742	HEM3	7	93	6.22407
orf19.1743	ACS1	497	2247	4.42689
orf19.1751	SPT23	46	129	2.96624
orf19.1753	PUS7	9	31	3.30944
orf19.1755	SET2	3	38	12.6074
orf19.1756	GPD1	0	68	41.6548
orf19.1757		9	38	3.2359
orf19.1759	PHO23	6	29	4.85385
orf19.1765		0	7	6.83951
orf19.1766		1	15	3.41976
orf19.1770	CYC1	24	75	2.27418
orf19.1771	CWC22	5	17	3.17706
orf19.1772		8	38	6.35413
orf19.1779	MP65	419	1151	2.43932
orf19.1783	YOR1	51	237	2.01341
orf19.1785		13	3	-5.66561
orf19.1789		0	8	4.61625
orf19.1798	TSC2	22	48	2.70104
orf19.1801	CBR1	12	51	3.47491
orf19.1802		9	73	7.94266
orf19.1806		11	41	3.25428
orf19.1815		7	75	9.19289
orf19.1816	ALS3	300	1835	5.34618
orf19.182		3	15	4.29748
orf19.1822	UME6	6	90	18.2387
orf19.1830		1	25	10.149
orf19.1832	FCY23	7	51	2.83666
orf19.1833		11	85	3.45443
orf19.1839	RPA19	36	623	14.646
orf19.1842	BUD5	18	64	3.6103
orf19.1849		15	33	2.90495
orf19.1854	HHF22	140	9	-8.7712
orf19.1855		4	18	2.07651
orf19.1856		2	23	4.55967
orf19.1861		85	21	-2.65035
orf19.1862		9	0	-13.5975
orf19.1864		16	36	2.29919
orf19.1871		43	121	2.46586
orf19.188		8	27	2.64755
orf19.1887		1	11	16.7678
orf19.1896	SSC1	197	573	3.19726
orf19.1901	MCM3	2	28	6.97991
orf19.1902	NOC4	5	26	2.98975
orf19.1923	RRN3	0	23	8.33489
orf19.1933		5	20	3.6103
orf19.1944	GPR1	207	51	-2.564
orf19.1956		8	44	4.71007
orf19.1960	CLN3	7	48	7.94266
orf19.1961		7	45	3.69554
orf19.1963	GDS1	41	235	4.78848
orf19.1964		12	35	3.06286
orf19.1978	GIT2	20	138	5.39316
orf19.198	ASN1	30	297	7.78381
orf19.2000		1	12	7.28077
orf19.2012	NOT3	17	36	3.08881
orf19.202	CDC47	6	35	3.80586
orf19.2020	HGT6	514	233	-2.13278
orf19.2023	HGT7	372	109	-3.81228
orf19.2037		0	6	16.3266
orf19.2050		50	20	-3.47247
orf19.2051		2	59	38.3895
orf19.2054	FGR15	3	16	2.52988
orf19.2057		43	131	2.48795
orf19.2059		10	26	3.15185
orf19.206		20	54	2.11804
orf19.2063		10	53	3.0487
orf19.2069	SMF3	5	24	3.2359
orf19.207	PGA55	33	138	3.96002
orf19.2078		22	4	-7.13867
orf19.2082	SAP3	19	6	-2.7813
orf19.2090		18	187	7.17401
orf19.2097		12	36	2.73885
orf19.2098	ARO8	21	73	3.85226
orf19.2119	NDT8	29	100	3.65212
orf19.2138	ILS1	137	351	2.44094
orf19.2143		9	92	8.04648
orf19.2179	SIT1	18	90	4.11842
orf19.2183	KRE3	14	254	11.1708
orf19.2198	FLC3	16	78	4.2655
orf19.2199	PHO86	2	13	2.08372
orf19.220	PIR1	182	69	-2.88676
orf19.2208		63	176	2.45288
orf19.223		22	74	2.57081
orf19.2232	RPL11	58	152	2.30593
orf19.2236	FHL1	11	65	3.95499
orf19.2238	LTE1	10	35	2.2189
orf19.2250	SPE3	20	46	3.18337
orf19.2266		6	23	2.11804
orf19.2270	SMF12	25	71	2.96352
orf19.2272	AFT2	15	50	4.29748
orf19.2277	TPK2	33	20	-2.24264
orf19.2280	ZCF1	1	23	11.4727
orf19.2296		2912	953	-3.19965
orf19.23	RTA3	4	32	5.07448
orf19.230		12	32	2.04082
orf19.2308		5	45	18.68
orf19.2309	PET127	11	85	5.41278
orf19.231	APL2	6	19	3.65614
orf19.2310		0	6	2.5593
orf19.2315		1	8	4.68413
orf19.2319		6	93	3.68074
orf19.2326		1	9	2.12842
orf19.2333		14	41	3.26532
orf19.2337	ALP1	2	120	54.7161
orf19.2344	ASR1	68	28	-3.4424
orf19.2347	MNN2	3	52	16.7678
orf19.2360	URA2	103	705	5.01705
orf19.2363		0	6	34.4182
orf19.2364	MIS11	101	391	2.898
orf19.2379	NOT4	0	15	10.5902
orf19.2382		4	44	3.90166
orf19.2387		2	13	6.659
orf19.2398		28	0	-35.6933
orf19.2407	DPS1-1	17	45	2.07856
orf19.2410	SYS3	11	29	2.74211
orf19.2416.1	MLC1	5	0	-3.60539
orf19.2417	SMC5	9	25	2.09017
orf19.2422	ARC1	2	23	3.77718
orf19.2423	ZCF11	5	33	7.81659
orf19.2425	HGT18	12	0	-2.48322
orf19.2432	HAC1	18	111	10.8972
orf19.2435	MSI3	81	408	3.83466
orf19.2440		2	13	3.38298
orf19.2443	RGD1	5	18	2.35338
orf19.2444	CHS7	1	11	3.82424
orf19.2451	PGA45	11	34	2.30435
orf19.2452		8	41	5.29511
orf19.2455		12	53	4.72407
orf19.2457		5	27	2.56732
orf19.2473		5	17	2.64755
orf19.2476		31	101	2.2785
orf19.2489		62	352	4.77362
orf19.2495	GSL1	7	21	2.05921
orf19.2498		16	37	2.16065
orf19.2504	BMS1	23	182	9.59003
orf19.2532	PRS	5	23	2.03469
orf19.2538	PTC2	28	181	3.63513
orf19.2546	TRP2	3	37	10.198
orf19.2560	CDC6	121	375	2.93974
orf19.2563		13	40	2.64755
orf19.2591		6	0	-3.14756
orf19.2593	BIO2	24	7	-4.2343
orf19.2601	HEM1	15	86	5.36299
orf19.2604		9	23	2.12842
orf19.2608	ADH5	107	30	-4.15988
orf19.2611	MCM6	4	23	2.70639
orf19.2616	UGT51C1	18	72	2.82925
orf19.2618	MET2	9	120	8.03091
orf19.2631		0	9	43.2434
orf19.2633	HGT14	3	27	5.88345
orf19.2644	QCR2	37	148	2.38031
orf19.2647	ZCF14	1	8	3.78222
orf19.265		3	18	6.39825
orf19.2653		17	47	3.00056
orf19.2654	RMS1	3	26	14.4145
orf19.2660	EAF3	1	16	11.914
orf19.267		15	64	4.22873
orf19.2671		1	10	3.2359
orf19.2672	NCP1	34	159	3.38298
orf19.2675		14	36	3.89779
orf19.2680		27	101	3.01527
orf19.2682		14	38	2.7316
orf19.2684		3	30	3.97133
orf19.2688	NAN1	5	94	10.2813
orf19.2694	TYS1	3	35	5.18479
orf19.2695	UBR1	64	225	3.06402
orf19.2712	HCA4	3	44	6.36342
orf19.2725		1	10	3.97133
orf19.2726		2	11	4.1719
orf19.273		11	43	2.75787
orf19.2737		652	333	-2.12743
orf19.2738	SUL2	4	17	2.78332
orf19.2746	EMP7	21	51	2.31661
orf19.2751		3	14	4.66474
orf19.2758	PGA38	109	22	-8.01902
orf19.2760		19	93	2.7211
orf19.2762	AHP1	6	0	-5.6184
orf19.2767	PGA59	2038	783	-2.686
orf19.2771	BEM3	14	63	3.37878
orf19.2772	HOS3	64	33	-2.10813
orf19.2774	LAB5	11	77	5.90608
orf19.2778		19	66	3.14538
orf19.2782		2	24	3.32641
orf19.2818		0	20	6.08937
orf19.2823	RFG1	61	247	4.27324
orf19.2827		4	15	3.38298
orf19.2830	RRP9	1	10	24.887
orf19.2834	RPD3	10	29	3.53007
orf19.2839	CIRT4B	25	6	-4.15478
orf19.2842	GZF3	18	62	2.97043
orf19.2843	RHO1	25	60	3.02309
orf19.2847		4	19	3.404
orf19.2849	AQY1	33	7	-3.88499
orf19.2871	SDH12	106	474	3.58868
orf19.2877	PDC11	1018	505	-2.13116
orf19.288	MET13	24	65	2.43854
orf19.2882	XUT1	1	35	10.7373
orf19.2886	CEK1	15	71	2.32887
orf19.2891		4	24	4.23608
orf19.2892		31	104	3.26532
orf19.2898		6	26	3.45653
orf19.2917		1	18	20.2979
orf19.2927	MNN11	1	11	12.6494
orf19.2929	GSC1	444	1610	3.04037
orf19.2930		6	101	9.04581
orf19.2933		1	8	4.11842
orf19.2935	RPL1	24	80	2.53143
orf19.2947	SNZ1	13	102	6.5005
orf19.2952	EXG2	3	30	3.79483
orf19.2959.1		60	15	-3.15655
orf19.2960	FRS2	22	91	4.05053
orf19.2969	RAD16	32	89	2.14057
orf19.2970	LYS2	59	416	5.44726
orf19.2971		6	30	2.83666
orf19.2972	PDE2	23	45	2.00849
orf19.2973		14	35	2.1134
orf19.2989	GOR1	14	38	2.54165
orf19.2990	XOG1	10	56	4.041
orf19.2991	HOL1	5	20	4.85385
orf19.2994.1	RPS16A	37	78	2.35493
orf19.30	SPF1	64	142	2.10993
orf19.300	AIP2	33	163	3.73373
orf19.3003.1	RPL6	72	194	2.67162
orf19.3010.1	ECM33	114	238	2.15376
orf19.3012	ARO8	6	24	4.5229
orf19.3015	ARX1	8	202	10.0439
orf19.3026	MAS1	0	7	9.00168
orf19.3030		0	7	4.50084
orf19.3034	RLI1	16	138	10.3896
orf19.3037		82	334	3.79099
orf19.3040	EHT1	15	71	4.909
orf19.3048		2	10	2.08595
orf19.3051		5	22	3.81629
orf19.3066	ENG1	154	35	-3.90522
orf19.308		8	64	7.46129
orf19.3091		15	104	10.7908
orf19.3103		63	268	3.33315
orf19.3126	CCT6	36	118	3.0982
orf19.313	DAL4	0	9	18.5329
orf19.3133	GUT2	68	190	3.08881
orf19.3135		24	4	-4.22345
orf19.3141		23	60	2.81174
orf19.3152	AMO2	16	710	30.8114
orf19.3159	UTP2	22	231	6.84489
orf19.3170		9	71	2.80595
orf19.3171	ACH1	228	689	2.89357
orf19.3175		51	167	3.14475
orf19.3180		2	12	9.70769
orf19.3188	TAC1	15	63	3.17706
orf19.3193	FCR3	11	52	2.98698
orf19.3198	OBPA	42	22	-2.06918
orf19.3199	PIKA	7	32	2.79464
orf19.3206	CCT7	3	64	24.2692
orf19.3214		38	88	2.02824
orf19.3216		16	55	3.03586
orf19.3218		8	31	3.30944
orf19.3219		4	60	7.00498
orf19.3222		7	36	2.4871
orf19.3226		2	13	2.75787
orf19.3228		3	14	4.41259
orf19.323		53	163	2.6126
orf19.3230	BOI2	17	132	7.29238
orf19.3231	CDC27	15	86	5.00093
orf19.3232		81	3	-32.1051
orf19.3237		90	217	2.19619
orf19.3249	LAG1	5	40	11.3624
orf19.3250		12	68	5.42748
orf19.3252	DAL81	3	19	2.83666
orf19.3254		0	23	14.1203
orf19.3256	SLN1	40	127	2.20025
orf19.3264.1		49	124	2.01444
orf19.3265	TRM1	1	35	28.2406
orf19.3276	PWP2	12	97	6.42108
orf19.3278	GSY1	1006	286	-3.5306
orf19.3288	NMA111	9	142	9.44621
orf19.3298	CCH1	119	193	2.09843
orf19.3301		26	115	3.3943
orf19.3302		173	57	-3.70981
orf19.3305	ZCF17	4	30	4.58909
orf19.3327	TRM2	5	24	5.1243
orf19.3328		2	51	28.5347
orf19.3330	CRL1	2	26	10.5902
orf19.3331	ABC1	14	88	8.56561
orf19.3334	RPS21	46	111	2.28587
orf19.334		10	53	3.12893
orf19.3340	SOD2	26	69	2.43183
orf19.3341		35	192	4.93556
orf19.3344	VPS17	1	13	6.17762
orf19.3345	SIZ1	27	87	2.48018
orf19.3352		3	14	3.7507
orf19.3358	LSC1	40	111	2.4169
orf19.3359	ARP8	22	64	2.38012
orf19.3363	VTC4	66	146	2.14874
orf19.3365	DAO2	8	29	3.10982
orf19.3370	DOT4	7	121	9.89681
orf19.3374	ECE1	8	382	31.3526
orf19.339	NDE1	55	351	5.38051
orf19.3391	ADK1	8	0	-4.30586
orf19.3395		5	26	5.15933
orf19.3406		1	21	5.88345
orf19.3419	MAE1	13	101	6.7292
orf19.3423	TIF3	6	171	11.9581
orf19.3432		4	29	3.86101
orf19.3437		1	10	4.70676
orf19.3438		1	17	3.08881
orf19.3441	FRP6	33	161	3.22119
orf19.3445	HOC1	4	17	5.05442
orf19.3449		12	45	3.58891
orf19.3463		10	65	2.68668
orf19.347	RSN1	76	17	-5.17295
orf19.3470		3	48	7.79557
orf19.3475		71	296	3.15059
orf19.3477		5	31	6.94247
orf19.3480		0	7	7.61172
orf19.3481		0	6	7.47818
orf19.3483		2	20	14.1203
orf19.3499		35	13	-2.69116
orf19.3501		10	67	3.93456
orf19.3526	ITR1	9	37	2.48996
orf19.3528		0	6	12.3552
orf19.3538	FRE9	1	9	19.4154
orf19.3540	MAK5	4	57	8.11237
orf19.3547		3	37	5.18479
orf19.3552		14	54	4.63322
orf19.3556		5	97	15.7971
orf19.356	GTT13	1	10	3.30944
orf19.3564	RPC4	1	15	4.03437
orf19.3575	CDC19	327	88	-3.27346
orf19.3586		8	49	3.90829
orf19.3592	JEM1	2	16	2.02333
orf19.3599	TIF4631	96	352	3.68058
orf19.3603	MFG1	6	34	3.41976
orf19.3608	MSH3	9	40	3.45947
orf19.3618	YWP1	69	684	7.48717
orf19.3624	MSU1	13	46	3.0678
orf19.3626		1	8	4.32434
orf19.3629	DSE1	73	24	-2.10761
orf19.3630	RRP8	3	38	6.73923
orf19.3635		40	136	2.85242
orf19.3653	FAT1	15	71	3.4231
orf19.3656	COX15	1	12	2.92996
orf19.3661		231	96	-2.10946
orf19.3663	PHO91	38	102	2.60833
orf19.3664	HSP31	34	5	-4.59914
orf19.3668	HGT2	242	60	-3.927
orf19.367	CNH1	17	47	2.39209
orf19.3675	GAL7	23	73	3.74111
orf19.3678		42	15	-2.11659
orf19.3680	SEP7	18	64	3.26148
orf19.3690.2		14	70	3.1211
orf19.3694		9	24	2.10824
orf19.3695		15	50	3.20392
orf19.3700	TOM7	14	72	2.59639
orf19.3704		0	7	51.186
orf19.3706		7	26	3.85099
orf19.3707	YHB1	78	697	6.69446
orf19.3708	SAP2	6	18	2.26933
orf19.3710	YHB5	34	201	3.85937
orf19.3714		4	17	5.44219
orf19.3726		8	24	2.47945
orf19.3733	IDP2	78	626	6.62848
orf19.3734	GEF2	44	103	2.4041
orf19.3737		13	30	2.05921
orf19.3740	PGA23	20	1	-19.8296
orf19.3744		6	23	2.96847
orf19.3751		66	229	3.01148
orf19.3752	RAD51	42	16	-2.56443
orf19.3753	SEF1	15	80	6.45341
orf19.3765	RAX2	27	152	3.19913
orf19.3774	PPG1	0	8	5.73636
orf19.3782.2		9	30	2.00264
orf19.3792		32	79	2.05016
orf19.3799		20	86	2.42911
orf19.3802	PMT6	12	39	2.47105
orf19.3809	BAS1	4	29	6.1335
orf19.3812	SSZ1	42	99	2.4169
orf19.3823	ZDS1	38	249	5.31176
orf19.3825	RCE1	6	21	3.7507
orf19.3839	SAP1	1	20	3.74019
orf19.3840		70	209	2.42179
orf19.3846	LYS4	29	131	3.38298
orf19.385	GCV2	27	976	24.2692
orf19.3851		2	12	2.94173
orf19.3854		25	81	2.34137
orf19.386	SAM4	6	149	11.3524
orf19.3865	RFX1	10	52	4.17725
orf19.3867	RPL7	6	113	16.7678
orf19.3869		1	13	10.5902
orf19.387	GCR3	20	63	2.13898
orf19.3870	ADE13	26	142	4.81222
orf19.3874		1	11	5.58928
orf19.3876	ZCF19	0	6	3.08881
orf19.3888	PGI1	275	148	-2.03882
orf19.3893	SCW11	58	9	-5.46327
orf19.3895	CHT2	74	18	-2.46409
orf19.3902		19	57	3.06559
orf19.3912	GLN3	19	60	3.03365
orf19.3914		6	52	6.32471
orf19.3931	SFC1	2	83	11.3158
orf19.3941	URA7	47	169	2.78746
orf19.3944	GRR1	35	112	2.59407
orf19.395	ENO1	1448	535	-3.01658
orf19.3952	SRP11	11	37	3.20493
orf19.3955	MES1	53	145	2.79641
orf19.3962	HAS1	3	60	8.66944
orf19.3967	PFK1	588	285	-2.27654
orf19.3980		65	132	2.08863
orf19.3981	MAL31	56	20	-2.20499
orf19.3982		23	7	-2.66617
orf19.3984		144	83	-2.20615
orf19.3991		1	17	9.83377
orf19.3995	RIM13	0	6	5.14802
orf19.3997	ADH1	751	280	-3.22138
orf19.4000	GRF1	13	43	3.10646
orf19.401	TCP1	16	55	2.40529
orf19.4010	PAN3	10	30	2.43575
orf19.4040	ILV3	12	46	2.93307
orf19.4051	HTS1	5	90	4.23207
orf19.4056	BRG1	78	222	2.74325
orf19.4060	ARO4	11	91	6.21518
orf19.4064	GPI7	6	23	7.06014
orf19.407	GCD6	20	96	4.09488
orf19.4076	MET1	66	292	3.59796
orf19.4077	MIT1	11	56	4.80972
orf19.4093	PES1	4	55	10.4799
orf19.4097		5	17	7.5014
orf19.4099	ECM17	108	767	5.62948
orf19.411		123	29	-4.57781
orf19.4110		14	42	3.2359
orf19.4118	CNT	44	121	2.072
orf19.412	SSH1	4	25	8.62906
orf19.4122		1	27	20.8863
orf19.4127		74	22	-3.13969
orf19.413		24	6	-2.05041
orf19.4135	PRC2	3	17	2.17235
orf19.4136	YBL53	1	12	9.11935
orf19.414	RSM22	6	54	6.9057
orf19.4144		0	6	5.29511
orf19.4145	ZCF2	5	40	5.13465
orf19.4152	CEF3	531	1568	2.41724
orf19.4159		3	26	4.05958
orf19.4160		0	10	26.0343
orf19.4166	ZCF21	6	43	3.29783
orf19.4175	TOK1	6	26	2.76143
orf19.4188	NMD5	19	138	2.81975
orf19.4215	FET34	19	124	5.38485
orf19.4225	LEU3	10	79	6.31192
orf19.4233	THR4	4	16	2.77592
orf19.4235	PDE1	12	4	-3.39937
orf19.4236	RET2	0	17	23.5338
orf19.4242	CST2	58	222	3.37433
orf19.4261	TIF5	9	69	3.97133
orf19.4262		19	53	4.18484
orf19.4265	UAP1	2	26	7.67112
orf19.4268	UTP13	0	71	26.5858
orf19.427		14	54	2.04373
orf19.4273		8	90	6.60254
orf19.4274	PUT1	205	95	-2.03197
orf19.428		3	12	2.12842
orf19.4282	IFH1	29	139	4.0665
orf19.4283		7	71	3.61832
orf19.4290	TRR1	12	34	4.87486
orf19.4295		8	36	4.20247
orf19.4304	GAP1	27	79	2.30063
orf19.4309	GRP2	60	200	3.02671
orf19.4318	MIG1	26	76	2.59407
orf19.4322	DAP2	37	100	2.26716
orf19.4326		3	37	8.64867
orf19.4328	CCC2	18	89	4.59645
orf19.4335	TNA1	9	65	4.4645
orf19.4337		3	26	3.53007
orf19.4342		2	26	7.06014
orf19.4348	MED14	19	45	2.49407
orf19.4354	MCM2	9	38	3.53007
orf19.4363	SGD1	8	62	8.88821
orf19.4369		21	56	2.00037
orf19.4370		5	19	2.70639
orf19.4372		40	15	-2.36067
orf19.4377	KRE1	6	30	2.072
orf19.4390		4	21	2.5593
orf19.440	SDH1	3	17	2.01132
orf19.4409		2	20	3.27792
orf19.4426	PEX3	1	16	2.82406
orf19.4433	CPH1	6	33	5.54725
orf19.4435		16	35	3.34748
orf19.4437		15	40	2.87635
orf19.4445		28	300	6.63807
orf19.4446		9	26	2.46176
orf19.4448	SOG2	17	54	2.52148
orf19.445		2	21	4.2655
orf19.4450	ZCF23	12	60	3.53007
orf19.4455		2	21	15.0028
orf19.4456	GAP4	116	248	2.4148
orf19.4457	BNI4	29	77	2.14326
orf19.4459		2	15	7.5014
orf19.446.2		4	18	3.90344
orf19.4476		26	156	5.21237
orf19.4477	CSH1	36	333	7.84237
orf19.4479		2	62	13.8261
orf19.4490	RPL17B	102	295	2.38536
orf19.4492		0	11	9.48707
orf19.4502		71	193	2.72289
orf19.4506	LYS22	16	222	10.3896
orf19.4513		13	110	4.041
orf19.4516		3	13	6.94983
orf19.4518		5	31	5.50276
orf19.4519	SUV3	4	21	8.82518
orf19.4526	HSP3	24	0	-12.0394
orf19.4531		53	171	2.81786
orf19.4532		8	22	3.34096
orf19.4533		3	12	2.64755
orf19.454	SFL1	21	67	3.36664
orf19.4546	HOL4	232	95	-2.57685
orf19.4549	FGR38	3	16	2.05921
orf19.4550		5	37	6.32471
orf19.4551	CTN1	266	646	2.00678
orf19.4590	RFX2	27	65	2.08791
orf19.4599	PHO89	26	474	9.86252
orf19.4602	MDH1-1	140	311	2.05621
orf19.4621		14	51	3.10305
orf19.4623.3	NHP6A	95	32	-2.37031
orf19.4627		12	58	3.06286
orf19.4630	CPA1	0	6	11.0315
orf19.4635	NIP1	18	110	5.61029
orf19.4640	PWP1	1	28	10.9154
orf19.4643		34	95	2.43575
orf19.4649	ZCF27	10	62	3.48594
orf19.4650	ILV6	19	95	3.31613
orf19.4651	PGA53	2	36	6.4718
orf19.4653		0	24	5.5738
orf19.4662	RLM1	15	52	2.20629
orf19.4670	CAS5	7	54	6.13118
orf19.4681	RAT1	25	109	5.27304
orf19.4682	HGT17	202	32	-5.73643
orf19.4697	MDN1	261	1339	4.3663
orf19.4698	PTC8	4	57	8.43295
orf19.4699		7	23	2.72778
orf19.4704	ARO1	112	261	2.17275
orf19.4705		0	8	4.05958
orf19.4716	GDH3	238	731	2.73865
orf19.4718	TRP5	21	143	4.85385
orf19.4721		0	18	9.60964
orf19.473	TPO4	6	41	6.80799
orf19.4739	MSS116	2	58	18.7535
orf19.474		8	27	3.67716
orf19.4744		5	22	2.86818
orf19.4746	JIP5	7	34	4.54836
orf19.4750		4	14	3.7507
orf19.4755	KEX2	54	143	2.29455
orf19.4757	NAR1	6	24	3.68581
orf19.4760		4	48	5.25981
orf19.4766	ARG81	19	75	3.61412
orf19.4771		8	59	5.07448
orf19.4773	AOX2	43	129	2.50347
orf19.4775	CTA8	15	80	3.90166
orf19.4779		12	45	2.20629
orf19.4786	FGR43	11	1	-5.66561
orf19.4788	ARG5,6	12	94	7.83234
orf19.4791		39	12	-2.17559
orf19.4792		13	57	3.26532
orf19.4798		53	93	2.23652
orf19.4799	CEF1	8	24	4.0974
orf19.4800	RIM2	15	4	-2.41733
orf19.4805		11	104	6.815
orf19.4808	NUP188	39	93	2.14823
orf19.4813	GUA1	13	80	7.01369
orf19.4818		4	19	6.94983
orf19.4820		1	12	35.3007
orf19.4826	IDH1	105	249	2.26787
orf19.4828		41	19	-2.26624
orf19.4833	MLS1	258	2761	10.6521
orf19.4851	TFA1	13	51	3.59311
orf19.486	NIP1	22	8	-2.36478
orf19.4866	CPP1	9	29	3.17053
orf19.4870	DBP3	4	91	20.5501
orf19.4871	ERO1	20	91	14.2005
orf19.4874	MNN23	7	54	5.05442
orf19.488	MEX67	8	33	2.61712
orf19.4880		0	11	11.8257
orf19.4883		14	68	2.16903
orf19.4885	MIR1	55	398	5.61281
orf19.4887	ECM21	104	16	-7.12248
orf19.4889		4	23	2.08022
orf19.4890	CLA4	18	151	5.00829
orf19.4892	TPK1	14	41	2.40241
orf19.4899	GCA1	56	8	-4.12044
orf19.4901		15	4	-4.04686
orf19.4907		64	31	-2.19542
orf19.4909	CBK1	12	55	4.02036
orf19.4909.1	RPL42	22	80	2.74144
orf19.4910	FGR41	19	7	-3.58822
orf19.4912		1	34	6.88364
orf19.4914.1		182	34	-5.94889
orf19.4927	BNI1	71	168	2.41363
orf19.4929		2	43	7.44177
orf19.493	RPL15A	71	188	2.03873
orf19.4932		5	139	7.87962
orf19.4933	FAD3	4	101	12.0837
orf19.4934	OP4	2	32	9.92832
orf19.4937	CHS3	66	368	4.56652
orf19.494		5	22	4.16044
orf19.4940		19	63	2.98698
orf19.4941	TYE7	46	25	-2.53603
orf19.4943	PSA2	39	26	-2.14852
orf19.4945	MSH6	15	6	-4.60331
orf19.4958	ECM25	3	13	4.11842
orf19.4966	AGC1	13	149	7.77923
orf19.4980	HSP7	891	2001	2.05565
orf19.4988		0	7	3.78222
orf19.4991	MPT5	22	115	4.48047
orf19.4997	KIS2	37	99	2.59712
orf19.4998	ROB1	281	888	2.75357
orf19.5000	CYB2	431	168	-2.89228
orf19.5001	CUP2	3	34	4.02649
orf19.5004	RAD54	1	9	2.84367
orf19.5009		0	6	14.4145
orf19.501		2	30	14.7822
orf19.5015	MYO2	89	276	2.82718
orf19.5021	PDX1	34	87	2.3278
orf19.5022		9	73	7.31971
orf19.5025	MET3	8	84	6.87435
orf19.5027	LCB2	13	55	4.09167
orf19.5029	MODF	0	18	37.0657
orf19.5032	SIM1	22	149	5.51035
orf19.5038		9	120	6.33522
orf19.5050	MTO1	0	9	3.71918
orf19.5056		131	0	-19.786
orf19.5058	SMI1	122	54	-2.33423
orf19.5059	GCS1	16	265	9.26644
orf19.506	YDJ1	6	46	3.84014
orf19.5061	ADE5,7	47	218	3.81859
orf19.5064	MRPL3	2	14	4.27139
orf19.5071	NRP1	5	48	5.66282
orf19.5079	CDR4	391	170	-2.43936
orf19.5081	FUN12	71	346	4.16438
orf19.5085		29	184	5.7082
orf19.5094	BUL1	18	65	2.89647
orf19.5097	CAT8	8	63	6.53063
orf19.51		46	303	5.36171
orf19.5100	MLT1	46	372	5.71961
orf19.5105	MED15	28	84	2.16759
orf19.5106	DIP2	16	251	13.1397
orf19.5110	OPY2	26	94	3.30232
orf19.5113	ADH2	112	504	4.21469
orf19.512		37	211	5.15441
orf19.5121	OPT5	1	10	6.17762
orf19.5125		143	32	-3.60333
orf19.5126		4	82	9.70769
orf19.5140		0	6	15.0028
orf19.5147	LMO1	20	90	2.8406
orf19.5162	BCK1	11	30	3.59796
orf19.5167	IFM1	3	50	5.58928
orf19.5169		4	20	4.93264
orf19.5175		53	116	2.31917
orf19.518		17	58	3.33702
orf19.5198	NOP4	6	107	7.68117
orf19.52		5	58	3.65614
orf19.5200	SIT4	0	6	3.78222
orf19.5203		6	21	4.02036
orf19.5213		15	50	2.68767
orf19.5229		15	87	2.10386
orf19.5232	CSI2	3	35	7.94266
orf19.5234	RBD1	16	36	2.94173
orf19.5244	MCD4	5	28	6.37374
orf19.5251	ZCF3	11	29	2.79884
orf19.5275		29	5	-3.04526
orf19.5280	MUP1	14	345	16.5325
orf19.529		5	29	4.85385
orf19.5292	AXL2	12	115	5.73636
orf19.5300		10	30	3.45333
orf19.5307	JEN2	102	581	5.28991
orf19.5311		2	22	8.08975
orf19.5312	MET4	7	46	5.29511
orf19.5335	SGS1	13	45	2.7679
orf19.5340		1	9	3.21138
orf19.5343	ASH1	36	13	-2.46409
orf19.5348	TPS3	136	47	-3.46029
orf19.5356		3	38	6.28145
orf19.536		17	45	3.05204
orf19.5365		11	38	4.50084
orf19.5377	HOS2	0	7	9.70769
orf19.5383	PMA1	1327	3175	2.13684
orf19.5388	SWD1	9	2	-3.85261
orf19.5391		5	74	7.67112
orf19.5393		13	35	2.30033
orf19.5404		0	10	9.41352
orf19.5407	SOF1	14	72	5.10931
orf19.541		2	21	3.93739
orf19.542	HXK2	406	44	-8.0287
orf19.5425		0	13	12.1787
orf19.5436	UTP8	0	38	15.3662
orf19.5437	RHR2	33	190	4.27324
orf19.5447	HGT19	83	15	-3.84805
orf19.5480	ILV1	15	76	3.95611
orf19.5483		1	12	5.6585
orf19.5495		17	145	5.32185
orf19.5496	AVT1	4	18	2.84367
orf19.5500	MAK16	0	10	13.9438
orf19.5505	HIS7	10	69	6.51237
orf19.5507	ENP1	4	39	5.56665
orf19.5508		0	16	15.8853
orf19.5510		5	126	11.4208
orf19.5516		12	50	4.33585
orf19.5517		2	22	8.19481
orf19.5519	GCV1	14	66	5.37533
orf19.5525		12	1	-12.4643
orf19.5531	CDC37	6	0	-9.74485
orf19.5537	WSC2	16	39	2.14326
orf19.5541		12	107	7.73501
orf19.5555		8	39	2.74561
orf19.5561	STE23	26	88	3.44984
orf19.5566		1	12	7.94266
orf19.5572		1	8	5.00093
orf19.558	GUT1	2	10	4.83283
orf19.5580	TEL1	66	195	2.54165
orf19.5595	SHE3	8	31	3.97133
orf19.5597	POL5	11	47	3.79483
orf19.5599	MDL2	8	40	3.9125
orf19.56	ARG2	2	11	3.08881
orf19.5602	BMT6	7	27	2.28652
orf19.5604	MDR1	5	275	40.7429
orf19.5605		21	110	4.78596
orf19.5607		0	9	30.4469
orf19.5612	BMT4	8	28	2.15334
orf19.5619		2	17	8.82518
orf19.5623	ARP4	2	12	6.76597
orf19.5627		20	53	2.05921
orf19.5639	HIS4	48	300	3.92145
orf19.5663	RCH1	0	33	10.51
orf19.5667	MNR2	11	56	2.73365
orf19.5675		38	114	3.19705
orf19.5677	DUR4	2	15	9.70769
orf19.5678		1	10	2.51326
orf19.568	SPE2	1	24	67.9539
orf19.5689		0	7	2.10247
orf19.5702		47	103	2.14702
orf19.5704		2	52	14.2464
orf19.5705	NAM2	11	44	3.00056
orf19.5723	POX1	18	49	2.05185
orf19.5736	ALS5	17	92	5.62024
orf19.5741	ALS1	4180	10183	2.15652
orf19.5746	ALA1	73	219	2.54115
orf19.5747		0	6	16.4737
orf19.5750	SHM2	108	262	2.60287
orf19.5752		13	39	2.4871
orf19.5753	HGT1	165	419	2.08622
orf19.5754		7	62	6.00112
orf19.5755		0	9	30.0056
orf19.5757		10	0	-16.9968
orf19.5758	SAL6	43	80	2.0148
orf19.5759	SNQ2	68	888	10.6112
orf19.5760	IHD1	178	1217	6.05935
orf19.5771	PBP2	7	28	3.76231
orf19.5772		2	41	6.37374
orf19.5784	AMO1	0	65	7.30529
orf19.5785		3	12	2.64755
orf19.58	RRP6	4	29	6.76597
orf19.5801	RNR21	14	59	3.97133
orf19.5805	DLD1	110	47	-2.67093
orf19.5806	ALD5	1645	4325	2.32454
orf19.5811	MET1	0	33	36.4039
orf19.5834		33	95	3.09714
orf19.5843	SRR1	5	25	2.94173
orf19.5845	RNR3	5	38	7.42786
orf19.5847		24	156	5.14443
orf19.5848		25	13	-2.0639
orf19.5850	NOC2	4	83	16.0508
orf19.5851	STE13	5	34	7.94266
orf19.5864	URK1	2	10	2.64755
orf19.5865		9	36	4.11842
orf19.5877	ATF1	7	38	6.74496
orf19.5884		7	70	5.52735
orf19.5887	NUP85	0	25	5.24319
orf19.5893	RIP1	2	16	6.00112
orf19.5903	RAX1	15	36	2.17943
orf19.5906	ADE2	20	58	3.34904
orf19.5908	TEC1	194	1244	5.72591
orf19.5912	MAK21	12	237	9.54513
orf19.5918		4	16	5.29511
orf19.5919	MEA1	3	23	7.1582
orf19.5924	ZCF31	12	87	3.8695
orf19.593	FGR32	4	16	3.63704
orf19.5935		4	15	3.19913
orf19.5938	SEN1	64	155	2.11416
orf19.5953		16	55	3.16489
orf19.5959	NOP14	4	88	12.1787
orf19.5960	NCE12	796	343	-2.33826
orf19.597		44	108	2.72429
orf19.5975	TRY4	33	89	2.25324
orf19.5987		2	12	3.2359
orf19.5989		8	23	2.17872
orf19.5991		14	147	10.0811
orf19.600	TRK1	18	60	3.5516
orf19.6007		14	51	3.05487
orf19.6009	SET1	27	78	2.90377
orf19.6010	CDC5	108	13	-6.52403
orf19.6011	SIN3	83	187	2.15809
orf19.6020		1	12	11.0315
orf19.6023		6	26	3.79483
orf19.6028	HGC1	18	140	5.2285
orf19.6032	SPE1	18	65	3.89525
orf19.6037	ASM3	7	43	4.7656
orf19.604		1	12	11.4727
orf19.6041	RPO41	37	307	6.0615
orf19.6054		18	54	2.94173
orf19.6068	SVF1	6	45	5.39316
orf19.6081	PHR2	163	39	-4.08396
orf19.6090		21	140	7.99169
orf19.6091	RIM8	3	15	4.58909
orf19.610	EFG1	21	173	6.99557
orf19.6116	GLK4	14	3	-12.7258
orf19.6119		44	13	-2.7813
orf19.6133	PIF1	7	41	3.48805
orf19.6137		2	23	11.865
orf19.6141	HGT16	17	60	3.02093
orf19.6146	CLG1	10	35	2.69861
orf19.6160		577	240	-2.5538
orf19.6165	KGD1	290	696	2.24858
orf19.6169	ATO1	185	555	2.57028
orf19.6192		1	14	11.0315
orf19.6193	TAF145	49	119	2.01324
orf19.6199		3	22	2.33608
orf19.6203	PUT3	8	61	7.81659
orf19.6208	MEF2	11	48	3.98898
orf19.6220		9	35	2.3397
orf19.6225	PCL7	118	35	-2.89351
orf19.6227		0	10	4.45785
orf19.6229	CAT1	1394	485	-2.88743
orf19.6233		4	20	3.90166
orf19.6237	RAC1	9	46	2.55103
orf19.6242	CYK3	47	19	-4.13041
orf19.6243	VPS34	4	23	6.03054
orf19.6244		17	45	2.71292
orf19.6254	ANT1	14	46	2.78076
orf19.6259		2	15	2.64755
orf19.6266		1	42	4.09167
orf19.6268		7	32	2.14326
orf19.6271		15	44	2.04529
orf19.6275		3	31	7.06014
orf19.6277		27	177	4.63887
orf19.6287	AAT21	20	57	2.97938
orf19.6291		5	65	6.24066
orf19.6294	MYO1	27	74	2.70639
orf19.6306		12	111	3.47964
orf19.6307		0	16	7.81659
orf19.6311		10	39	3.37248
orf19.6317	ADE6	44	146	3.39524
orf19.6338		9	2	-14.7306
orf19.6345	RPG1A	29	91	3.63597
orf19.6356		1	8	7.94266
orf19.6362	SPA2	67	178	2.44531
orf19.6367	SSB1	135	292	2.01559
orf19.637	SDH2	86	248	2.51247
orf19.6385	ACO1	377	1840	4.04462
orf19.6402	CYS3	23	480	17.7506
orf19.6404	GSH2	1	23	7.5014
orf19.6415.1		13	61	2.78217
orf19.6417	TSR1	14	143	10.4431
orf19.6418		2	48	19.1948
orf19.6420	PGA13	25	6	-2.26624
orf19.6422	SSY5	10	30	2.28416
orf19.643		9	32	3.12893
orf19.6440		49	22	-2.58246
orf19.6442	PRP8	126	396	2.71544
orf19.6449		0	11	9.83377
orf19.646	GLN1	499	1261	2.20388
orf19.6487		26	4	-3.96593
orf19.6489	FMP45	25	7	-3.53011
orf19.6494	WHI3	9	33	2.249
orf19.6499		2	19	2.37177
orf19.6511	LIG1	7	60	7.62174
orf19.6515	HSP9	431	1540	2.92107
orf19.6524	TOM4	29	79	2.36287
orf19.6527		159	411	2.0246
orf19.6536	IQG1	139	43	-2.61843
orf19.6544	LPI9	65	132	2.22682
orf19.6548	ISU1	9	43	3.27792
orf19.655	PHO84	52	1044	4.66999
orf19.6556		8	84	5.4768
orf19.6557		15	39	2.86818
orf19.6558		2	29	4.90288
orf19.6559		9	2	-2.79503
orf19.6563		2	19	5.44219
orf19.6568	SMC6	16	69	3.34287
orf19.6569		4	14	3.2359
orf19.657	SAM2	123	328	2.4185
orf19.6573	BEM2	131	781	4.36942
orf19.6577	FLU1	3	86	12.6494
orf19.6578		364	127	-2.78384
orf19.6584	PRT1	10	143	5.92785
orf19.660		4	14	3.38298
orf19.6600		2	13	2.08424
orf19.661	KRR1	7	28	6.17762
orf19.6621	MHP1	247	112	-2.28404
orf19.6632	ACO2	12	106	5.63207
orf19.6638	PTC4	23	8	-2.26624
orf19.6648	SDA1	3	49	2.79884
orf19.6653	MTG2	2	50	12.8595
orf19.6654		2	22	10.8844
orf19.6656	DUR3	19	8	-2.77615
orf19.6659	GAP6	184	461	2.42774
orf19.6660		2	48	15.8853
orf19.6665		29	87	2.73885
orf19.6672	MDJ1	8	37	4.909
orf19.6679		7	22	2.56732
orf19.6680	FGR27	21	58	2.36389
orf19.6686	ENP2	10	68	10.5351
orf19.6689	ARG4	1	13	5.18479
orf19.6691		11	105	7.87477
orf19.6692	MNN26	6	42	6.04185
orf19.6693		6	45	5.95699
orf19.6702	DED81	31	61	2.07511
orf19.6705		41	422	7.83059
orf19.6713		6	22	2.04972
orf19.6716	ABD1	4	15	4.55967
orf19.6723		0	8	3.16064
orf19.6724	FUM12	0	6	4.42706
orf19.6734	TCC1	41	169	4.5834
orf19.6736		17	86	3.9272
orf19.6749	KRS1	5	26	4.74955
orf19.6760	MDS3	34	106	2.64755
orf19.6763	SLK19	1146	412	-2.92034
orf19.6769		13	47	3.13151
orf19.6782	BMT1	5	51	3.84928
orf19.6783		20	75	4.15045
orf19.680	TIM5	18	77	3.48805
orf19.6800	POS5	7	23	3.29473
orf19.6805		7	27	2.60918
orf19.681	HAP43	21	42	2.44698
orf19.6818		5	75	7.52736
orf19.6824	TRY6	1	16	9.41352
orf19.6831	PRP5	10	39	2.09896
orf19.6840		0	18	9.8842
orf19.6844	ICL1	186	2581	12.6696
orf19.685	YHM1	13	73	4.48613
orf19.6852.1		16	38	2.32241
orf19.6853		11	60	5.02356
orf19.6855		9	35	3.80161
orf19.6862		1	25	8.05297
orf19.6864		11	84	2.52441
orf19.6871		13	98	6.74866
orf19.6874		9	107	6.21774
orf19.688		0	7	7.5014
orf19.6898		5	52	5.84668
orf19.6899		1	21	10.3381
orf19.690	PLB2	0	7	21.1804
orf19.6902	DBP7	4	26	5.84668
orf19.691	GPD2	147	558	3.04511
orf19.6913	GCN2	20	65	2.55163
orf19.6921		10	25	3.76541
orf19.6928	SAP9	538	177	-3.13253
orf19.6937	PTR22	186	467	2.10776
orf19.6938	MEU1	5	64	11.3925
orf19.6948	CCC1	4	28	4.80482
orf19.6952		5	18	3.21489
orf19.6955	HBR3	0	17	79.4266
orf19.6966		14	41	2.4399
orf19.6967	USO6	34	139	3.64619
orf19.6968		31	76	2.25324
orf19.6983		20	98	2.40529
orf19.6984		6	51	5.85671
orf19.6987	DNM1	73	187	2.53167
orf19.6988	OST1	0	6	2.64755
orf19.6992		12	39	2.6815
orf19.6993	GAP2	246	678	2.6119
orf19.700	SEO1	1	21	6.53063
orf19.701	CFL11	3	46	21.1804
orf19.7011		21	201	8.32636
orf19.7016	PHM5	10	83	2.76868
orf19.7018	RPS18	79	233	2.63845
orf19.702		5	48	5.5738
orf19.7022		0	6	5.00093
orf19.7025	MCM1	21	52	2.67697
orf19.7033		15	45	2.75787
orf19.7036		0	12	10.296
orf19.7041		6	52	8.11916
orf19.7042		10	51	4.61625
orf19.7046	MET28	18	63	3.28297
orf19.7047	RTF1	11	58	3.45496
orf19.7049	CYB5	6	32	3.62813
orf19.7052		24	58	2.23225
orf19.7053	GAC1	104	230	2.03604
orf19.7057	GUS1	21	58	2.95242
orf19.7062	RPA135	20	254	8.90843
orf19.7064	GLN4	14	65	2.90495
orf19.7072	PEL1	1	10	10.149
orf19.7085		50	8	-9.63154
orf19.7089	PMR1	12	72	3.30944
orf19.7093	HGT13	145	37	-4.68357
orf19.7094	HGT12	123	12	-8.24661
orf19.7095		5	18	2.09598
orf19.7106	VPS7	20	49	2.29455
orf19.7149		32	75	2.04669
orf19.7150	NRG1	48	129	2.14326
orf19.7153		9	56	6.07957
orf19.7166		16	102	5.91806
orf19.717	HSP6	160	1100	3.91383
orf19.7186	CLB4	13	5	2.21656
orf19.7197		3	31	3.48996
orf19.7203	MRP7	2	43	6.61888
orf19.721		1	23	32.6532
orf19.7215		16	382	13.9879
orf19.7219	FTR1	20	82	2.61425
orf19.7221	SET3	19	65	3.01273
orf19.723	BCR1	29	116	3.35787
orf19.7231	FTR2	18	134	5.52391
orf19.7254		0	11	11.2962
orf19.726	PPZ1	9	29	2.55466
orf19.728	TSC11	8	36	3.11823
orf19.7296		477	215	-2.39042
orf19.73		31	79	2.21462
orf19.7305		5	0	-7.36529
orf19.7306		20	100	6.03919
orf19.7310		152	44	-4.18957
orf19.7313	SSU1	10	25	2.17235
orf19.7323	CBP1	45	90	2.25252
orf19.7332	ELF1	15	331	10.0319
orf19.734	GLK1	29	17	-3.35094
orf19.7344		4	17	2.8552
orf19.7349	CHS4	57	202	3.27565
orf19.7354	LAC1	4	21	5.77648
orf19.7358	SAM5	0	59	21.8864
orf19.7359	CRZ1	16	107	3.0618
orf19.736	SRB8	23	99	3.13784
orf19.7362	SKN1	44	188	4.10752
orf19.7367	UBP1	7	53	3.95368
orf19.7368		55	138	2.37896
orf19.7369	TRM12	1	8	2.9785
orf19.7370		3	22	5.77648
orf19.7371	ZCF35	10	37	3.47491
orf19.7372	MRR1	26	128	4.5834
orf19.7374	CTA4	15	116	6.56593
orf19.7377	ASE1	11	3	-3.68265
orf19.7378		3	13	2.5495
orf19.7382	CAM1	257	595	2.17235
orf19.7384	NOG1	15	241	9.8785
orf19.7388	PBS2	11	34	2.85936
orf19.7392	DED1	68	671	8.1479
orf19.7393		17	55	2.11804
orf19.7394	GDA1	3	86	35.0801
orf19.7397		6	26	10.1088
orf19.7400	ALS7	35	67	2.25532
orf19.7401	ISW2	14	60	4.53866
orf19.7402	DOT1	29	56	2.03658
orf19.7410	CYM1	33	86	2.80935
orf19.7412	MUB1	8	28	2.40045
orf19.7436	AAF1	19	47	2.77625
orf19.7437		8	1	-4.34363
orf19.744	GDB1	752	389	-2.14065
orf19.7450		2	11	2.29455
orf19.7451	FUN31	41	87	2.45144
orf19.7459		30	78	2.80801
orf19.746		0	9	8.29567
orf19.7468		42	14	-3.27346
orf19.7469	ARG1	9	59	7.33593
orf19.7475	PHO81	4	45	13.2378
orf19.7478		3	39	6.6504
orf19.7479	NTH1	32	228	4.48047
orf19.748		43	125	2.53597
orf19.7481	MDH1	27	189	6.09996
orf19.7488		3	20	3.53007
orf19.7489		31	98	2.8067
orf19.7497		11	40	3.48594
orf19.7500	PXA1	88	50	-2.14852
orf19.7501		90	208	2.00288
orf19.7502		21	49	2.34564
orf19.7504		6	60	7.80331
orf19.7514	PCK1	233	4135	15.6609
orf19.7516		27	68	2.20629
orf19.7527		29	13	-2.66617
orf19.7529	EPL1	114	67	-2.00724
orf19.7534	MIS12	8	123	17.7484
orf19.7539	INO2	0	6	7.76616
orf19.7549	PMT5	0	21	18.0916
orf19.7551	ALO1	27	89	2.14326
orf19.7552		18	147	5.63608
orf19.756	SAP7	3	24	4.53866
orf19.7561	DEF1	43	244	4.48181
orf19.7569	SIK1	3	23	53.272
orf19.7571	UBC4	27	62	2.23571
orf19.7574		21	52	2.19437
orf19.7583	ZCF39	3	20	3.89459
orf19.7585	INO1	2	111	9.15612
orf19.7586	CHT3	76	3	-7.99149
orf19.7590		146	395	2.43436
orf19.7593		5	27	4.81373
orf19.7599	UTP5	2	13	3.17155
orf19.76	SPB1	38	239	4.84611
orf19.7600	FDH3	13	40	2.07602
orf19.7610	PTP3	687	351	-2.10169
orf19.7619		11	35	2.91615
orf19.7624		2	36	3.4653
orf19.7635	DRS1	11	131	10.3866
orf19.764		3	30	3.29473
orf19.768	SYG1	4	32	5.29511
orf19.771	LPG2	4	40	15.1289
orf19.772	LYS21	16	74	2.73407
orf19.780	DUR1,2	21	252	8.73693
orf19.783		36	70	2.21656
orf19.787		6	21	2.31757
orf19.789	PYC2	264	629	2.09735
orf19.801	TBF1	12	59	2.68357
orf19.808		10	41	3.73772
orf19.809		6	55	6.39825
orf19.813		32	232	4.22289
orf19.815	DCK1	539	1795	2.96407
orf19.828		0	14	31.55
orf19.829	SCH9	17	170	4.92878
orf19.841		12	32	2.25532
orf19.846		152	49	-3.27472
orf19.85	GPX2	10	39	3.53007
orf19.850		6	20	2.05921
orf19.872		0	8	39.7133
orf19.880		13	59	3.22458
orf19.89	PEX7	9	36	3.28938
orf19.896	CHK1	31	104	2.46849
orf19.9		14	1	-5.85446
orf19.906	ROM2	65	195	2.64755
orf19.908	FEN12	8	58	4.02036
orf19.918	CDR11	874	378	-2.57834
orf19.920	RMT2	3	12	5.67333
orf19.928		3	14	3.38298
orf19.930	PET9	485	1685	2.80155
orf19.932		42	170	3.56216
orf19.935	AGA1	0	12	5.58928
orf19.939	NAM7	47	158	2.63179
orf19.941	SEC14	21	151	2.91326
orf19.943	FET33	1	12	8.82518
orf19.96	TOP1	16	149	7.27026
orf19.964	SMC4	26	68	2.85859
orf19.969		24	109	4.48047
orf19.97	CAN1	56	164	2.51178
orf19.979	FAS1	935	3274	2.9702
orf19.984	PHO8	1	19	9.11935
orf19.985		19	57	2.75787
orf19.996		4	17	2.13275
orf19.999	GCA2	116	14	-7.90487
snR10c		23	10	-2.86428
snR35c		0	6	4.33379
tD(GUC)6	tD(GUC)6	32	11	-3.37949
tD(GUC)7	tD(GUC)7	306	73	-2.75012
TER1		258	85	-3.08141
tL(AAG)1	tL(AAG)1	5	0	-19.8296
xi-Ra		1	8	5.73636

## Sheet: C. a. 0h - PK + C. a. 3h
ORF name	Gene Symbol	Read Count		Fold Change of expression
		0ca	3PKca
Ca19-mtDNA:5525-9928		3	35	4.03454
CaalfMr16	RRNL	182070	74686	-2.14053
CaalfMr17	RRNS	43451	23730	-2.44712
CaalfMt20	tK(UUU)6mt	8	1	-4.85094
CEN1		3	14	9.31294
CEN2		1	9	15.1335
CEN3		2	6	12.8053
CEN4		1	9	7.45035
CEN5		1	7	19.79
CEN6		2	13	5.52956
CEN7		2	19	10.4771
CENR		6	17	3.20132
chi-6a		0	5	5.82059
iota-2a		0	5	30.2671
kahu-3a		5	0	-9.87873
koppa-1a		0	5	5.43255
koppa-3a		3	15	15.3663
mu-Ra		1	7	11.6412
nu-2a		1	55	29.782
orf19.1002		9	21	2.48345
orf19.1005		2	13	5.58776
orf19.1007	KCS1	1	11	18.363
orf19.1011	MNN21	11	64	26.6735
orf19.1012		9	19	18.2378
orf19.102		2	6	7.916
orf19.1027	PDR16	2	15	11.1423
orf19.1028	ELA1	3	10	6.11162
orf19.1030		5	259	40.1232
orf19.1031	HMG1	24	89	6.14072
orf19.1033	STR2	29	136	6.41084
orf19.1035	WAR1	16	40	2.50733
orf19.1042	POR1	28	37	3.1669
orf19.1045		1	22	6.9071
orf19.1047	ERB1	4	184	30.4805
orf19.1052		2	6	2.36405
orf19.1054		13	22	3.67425
orf19.1055	CDC3	70	151	3.45559
orf19.1058		0	5	6.50761
orf19.1064	ACS2	135	1165	7.37839
orf19.1065	SSA2	104	1158	10.8934
orf19.1066	GIG1	1	6	4.65647
orf19.1069	RPN4	49	184	4.49438
orf19.107		8	43	7.60557
orf19.1075		6	43	12.8053
orf19.1075.1		7	31	4.85049
orf19.1077	ATM1	12	115	13.1635
orf19.1078	HBR2	48	251	11.0175
orf19.1080		1	20	12.3396
orf19.1083		2	22	2.47375
orf19.1084	CDC39	197	265	2.05799
orf19.1085		26	72	18.0608
orf19.1086		31	60	9.913
orf19.109		1	8	10.186
orf19.1091	NOP8	0	57	15.8499
orf19.1092		2	11	5.43255
orf19.1093	FLO8	34	70	4.213
orf19.1096		9	32	3.04173
orf19.1097	ALS2	714	1275	2.04183
orf19.1105		3	7	5.01775
orf19.1105.2	PGA56	6	66	12.0615
orf19.1105.3		0	8	5.48798
orf19.1106		8	15	2.69202
orf19.1108	HAM1	0	6	27.5508
orf19.1112	BUD7	18	32	3.10431
orf19.1113		0	10	4.13908
orf19.1116		3	12	8.14882
orf19.1119	MTR1	18	86	4.82277
orf19.1121		13	32	4.28885
orf19.113	CIP1	5	50	26.7747
orf19.1133	MSB1	19	102	4.43473
orf19.1135	CAS1	6	12	3.13416
orf19.1139		36	113	4.27549
orf19.1142	AVT4	8	66	6.51906
orf19.1143		2	7	5.23853
orf19.1150		7	12	2.32823
orf19.1152		8	0	-4.23067
orf19.1154	EGD1	41	212	4.51951
orf19.1161	PLD1	109	201	2.34386
orf19.1170	ARO7	2	19	4.93038
orf19.118	FAD2	33	104	5.65428
orf19.119		21	28	2.06273
orf19.1192	DNA2	11	29	2.81328
orf19.1195		19	184	11.6941
orf19.1196	PKH3	26	43	2.42136
orf19.1199	NOP5	12	121	12.8053
orf19.1214		50	131	3.41602
orf19.1217		12	37	4.30371
orf19.1219		3	13	2.74131
orf19.122	CDC2	27	46	2.7493
orf19.1223	DBF2	60	145	3.14743
orf19.1224	FRP3	234	506	2.43248
orf19.1227	ZCF4	2	9	14.7455
orf19.1228	HAP2	13	26	3.49235
orf19.1229		19	55	4.91933
orf19.1232	VRG4	8	125	8.78631
orf19.1233	ADE4	15	461	35.6083
orf19.1235	HOM3	6	134	22.1182
orf19.1237	ARO9	0	12	7.50209
orf19.1239		2	35	11.6412
orf19.1240		127	370	4.23388
orf19.125	EBP1	3	7	5.23853
orf19.1251	BRN1	15	24	3.16494
orf19.1253	PHO4	5	33	12.639
orf19.1255	ZCF5	6	15	3.63787
orf19.1259		26	95	3.64906
orf19.1261	CGT1	2	10	4.78582
orf19.1263	CFL1	7	12	2.91029
orf19.1264	CFL2	7	510	69.847
orf19.1265		19	58	2.55459
orf19.1266		0	6	26.7747
orf19.1267		14	34	2.49454
orf19.1270	FRE3	0	9	5.32168
orf19.1272		6	45	10.3606
orf19.1274		2	8	6.25713
orf19.1275	GAT1	5	16	4.9475
orf19.1281		0	8	18.2835
orf19.1283	MEC1	34	67	4.84125
orf19.1285		19	51	2.81641
orf19.1286		3	29	15.4246
orf19.1287		10	180	22.7345
orf19.1291	ABZ1	12	28	2.68253
orf19.1295	VAS1	61	1241	17.5472
orf19.1296		0	8	19.79
orf19.1298	NUP84	12	53	3.51474
orf19.1299	RPN6	1	4	8.04299
orf19.130		31	51	2.32823
orf19.1300		0	20	41.5907
orf19.1303		0	18	27.706
orf19.1304		0	11	17.8498
orf19.1306		0	6	4.50125
orf19.1308		0	46	13.8031
orf19.1311	SPO75	7	25	-2.6927
orf19.1313	CDR3	7	12	2.82714
orf19.1318		1	12	9.31294
orf19.1321	HWP1	644	1940	3.68214
orf19.1323		37	81	3.15605
orf19.1324	RAD2	17	68	5.71476
orf19.1325	ECM38	9	116	23.1368
orf19.1326		11	26	2.74861
orf19.1327	RBT1	10	262	25.3419
orf19.1330		1	9	6.05341
orf19.1331	HSM3	49	7	-2.20612
orf19.1332	SNG4	2	6	8.31512
orf19.1333	SNG3	11	33	6.75188
orf19.1335		17	270	11.4586
orf19.1342	SHM1	0	31	19.8513
orf19.1343	MED16	10	24	2.54205
orf19.135	EXO84	2	20	3.3554
orf19.1350		7	24	4.14426
orf19.1351		0	5	5.35494
orf19.1353		1	4	-10.1874
orf19.1357	FCY21	29	188	11.5425
orf19.1358	GCN4	67	1323	23.8186
orf19.1359		10	44	9.53468
orf19.136		5	77	19.2079
orf19.1362	SMM1	3	39	24.7791
orf19.1363		43	211	6.52997
orf19.1364		8	20	4.22758
orf19.1365		2	12	8.14882
orf19.1368		44	7	-2.67812
orf19.1369		9	30	3.49235
orf19.137		0	6	23.8644
orf19.1370		1	4	30.2671
orf19.1373	INP51	11	40	4.57332
orf19.1375	LEU42	114	622	7.30584
orf19.1378	SUP35	45	130	2.24071
orf19.1389		43	66	3.78726
orf19.139	TRA1	252	408	4.40388
orf19.1394		6	142	27.5023
orf19.1397		3	7	8.73088
orf19.1401	EAP1	22	2363	78.966
orf19.1402	CCT2	45	111	3.83032
orf19.1409	VAC7	10	42	5.33043
orf19.1409.1		19	113	5.9661
orf19.1414		2	22	3.80577
orf19.1415	FRE1	3	113	14.5515
orf19.1416	COX11	0	14	26.7747
orf19.1422	FZO1	19	148	9.55261
orf19.1426		7	89	6.89158
orf19.1430		0	17	30.2671
orf19.1433		21	4	-2.85317
orf19.1435	TEF1	89	255	3.86644
orf19.144	SNU114	24	97	4.10028
orf19.1440		3	15	3.78338
orf19.1441		15	145	14.736
orf19.1442	PLB4.5	25	50	2.86179
orf19.1445	ESC4	2	11	6.9847
orf19.1447		0	11	8.14882
orf19.1461		1	16	20.3721
orf19.1464	BMT5	14	20	2.39116
orf19.1468	CDC55	54	1498	10.283
orf19.1470	RPS26A	136	317	2.90622
orf19.1478	STT3	27	45	2.90161
orf19.1479		19	27	2.2959
orf19.1481	HAP42	29	48	2.86872
orf19.1483		0	6	19.2079
orf19.1486		12	19	2.53718
orf19.1491		2	18	6.59667
orf19.1492	PRP39	0	16	38.4159
orf19.1493	RAD7	6	41	8.25005
orf19.1494	RAD23	13	21	5.3663
orf19.1497	ZCF6	0	23	13.9694
orf19.1499	CTF1	20	84	4.76629
orf19.1502		0	6	10.4771
orf19.1505		23	70	4.07441
orf19.1508		1	10	10.3108
orf19.1509	ROD1	17	118	7.79453
orf19.151	TPO5	2	36	38.4159
orf19.1510	SRD1	17	57	4.47021
orf19.1513	FAB1	156	312	2.40099
orf19.1516		35	61	2.13148
orf19.1517	ARO3	4	107	37.8338
orf19.1519		12	24	2.78376
orf19.1523	FMO1	8	41	6.20863
orf19.1526	SNF2	84	198	3.51548
orf19.1527		2	6	7.56676
orf19.1529		5	40	9.24185
orf19.1531		16	89	7.65631
orf19.1533		3	59	5.16868
orf19.1534		7	20	3.71409
orf19.1535		7	44	8.96802
orf19.1536		8	40	7.47857
orf19.1538	TLG2	7	16	3.54527
orf19.1539		28	7	-2.57706
orf19.1541		8	79	30.7464
orf19.1542	HEX3	26	181	9.23533
orf19.1543	OPI1	10	18	2.49454
orf19.1547		0	5	4.30723
orf19.1553	ENT3	48	98	2.03533
orf19.1555	SAC3	31	55	3.15163
orf19.1560	POB3	47	60	2.69648
orf19.1563	ECM3	11	48	2.87854
orf19.1566	UTP21	8	101	14.2281
orf19.1569	UTP22	21	161	9.13185
orf19.1573		50	127	3.37594
orf19.1574		3	11	7.77842
orf19.1576		5	42	9.92272
orf19.1578		25	749	34.2533
orf19.158		9	44	5.43255
orf19.1580		1	12	17.4618
orf19.1584		6	57	11.6412
orf19.1585	ZRT2	3	35	4.996
orf19.1589		0	18	6.91623
orf19.1595		8	19	2.87149
orf19.1596	FGR28	3	22	5.82059
orf19.1599		1	4	19.79
orf19.1601	RPL3	269	724	3.18854
orf19.1604		15	28	3.34051
orf19.1605	PMS1	4	12	3.49235
orf19.1606		9	28	7.33394
orf19.1607	ALR1	73	300	4.90817
orf19.1608		8	37	5.60893
orf19.1609		2	78	33.8888
orf19.1611		2	25	24.2524
orf19.1613	ILV2	41	1021	35.6678
orf19.1614	MEP1	47	167	3.85495
orf19.1616	FGR23	3	42	22.7003
orf19.1617		15	51	4.13908
orf19.1619		20	43	3.2677
orf19.1621	GPA2	22	53	5.44396
orf19.1622	YCG1	15	53	4.44089
orf19.1623	CAP1	14	73	5.60355
orf19.1624		18	43	4.02964
orf19.1628	LAP41	29	36	2.25361
orf19.163	PAN6	0	12	10.7681
orf19.1631	ERG6	5	67	4.81378
orf19.1633	UTP4	2	85	5.45297
orf19.1636	STE5	2	8	5.42523
orf19.164		3	34	6.9847
orf19.1646		4	40	8.05181
orf19.1648	RAD5	23	67	3.94506
orf19.1651		2	5	7.79959
orf19.1655	PXP2	236	18	-6.90795
orf19.1655.3		11	45	3.78338
orf19.1656		8	54	11.1039
orf19.1659	ALG8	0	20	25.6106
orf19.166	ASG1	17	238	20.6366
orf19.1662		1	8	29.1029
orf19.1663	MNT2	8	19	5.41762
orf19.1665	MNT1	255	592	2.76532
orf19.1666		3	41	16.1918
orf19.1667		13	31	4.43473
orf19.1668		0	5	13.9694
orf19.1669	AFG3	36	101	3.34311
orf19.1670	BRO1	44	83	2.32823
orf19.1671	UTR2	38	148	4.50272
orf19.1671.1		1	4	4.65647
orf19.1672		235	322	2.0969
orf19.1673	PPT1	3	36	17.0252
orf19.1674	CDC53	25	67	6.65524
orf19.1676		20	45	7.69094
orf19.168		0	5	16.2976
orf19.1683	PPH21	45	65	2.27762
orf19.1686		6	16	4.78582
orf19.1687		13	187	15.4399
orf19.169	CHO2	16	127	9.84208
orf19.1690	TOS1	102	637	5.60736
orf19.1693	CAS4	63	517	8.40128
orf19.1698		6	14	2.7391
orf19.1699	BZZ1	10	38	6.04446
orf19.1706	MET18	6	38	8.35425
orf19.171	DBP2	19	415	22.5999
orf19.1712	GEA2	46	165	4.76629
orf19.1714	PGA44	1	8	13.9694
orf19.1715	IRO1	23	90	6.14395
orf19.1718	ZCF8	4	55	9.31294
orf19.1720		11	23	2.69864
orf19.1725		3	26	16.2976
orf19.1729		0	9	14.2604
orf19.1730		0	6	5.82059
orf19.1734		55	95	3.12195
orf19.1742	HEM3	7	183	15.0723
orf19.1743	ACS1	497	681	2.16566
orf19.1744	HEM4	13	30	3.45078
orf19.1748		1	11	12.4727
orf19.1751	SPT23	46	90	2.89413
orf19.1753	PUS7	9	33	4.72923
orf19.1755	SET2	3	39	30.1008
orf19.1756	GPD1	0	93	108.03
orf19.1757		9	60	5.9758
orf19.1759	PHO23	6	29	6.11162
orf19.176	OPT4	87	760	8.24276
orf19.1763	IFR1	3	18	3.20132
orf19.1765		0	10	35.5056
orf19.1766		1	6	3.78338
orf19.1767		8	49	14.934
orf19.1768		4	18	17.2955
orf19.177		9	64	5.62146
orf19.1770	CYC1	24	38	5.76835
orf19.1771	CWC22	5	30	5.82059
orf19.1772		8	77	12.3396
orf19.1773	RAP1	10	26	2.37575
orf19.1774		2	18	4.33898
orf19.1778		6	14	2.97497
orf19.1779	MP65	419	1722	4.78465
orf19.1780		1	15	18.6259
orf19.1782.1		1	5	10.7681
orf19.1783	YOR1	51	585	7.0335
orf19.1785		13	3	-3.57925
orf19.1789.1	LYS1	0	27	30.7413
orf19.1791		0	49	39.1726
orf19.1792		6	23	3.63787
orf19.1793		5	17	14.988
orf19.1794		8	123	27.0278
orf19.1795	PUF3	27	50	4.0215
orf19.1795.1		1	6	3.58936
orf19.1798	TSC2	22	83	7.76078
orf19.1799	GAP5	16	50	4.15756
orf19.1801	CBR1	12	53	5.60232
orf19.1802		9	67	10.9004
orf19.1803	CDC43	0	8	32.5953
orf19.1806		11	35	6.25713
orf19.1808	MED5	13	58	2.69864
orf19.1814	STT4	147	254	2.39097
orf19.1815		7	257	50.057
orf19.1816	ALS3	300	1295	5.11688
orf19.182		3	28	13.3114
orf19.1821		0	10	15.1335
orf19.1822	UME6	6	159	45.2066
orf19.1823		12	40	6.08923
orf19.1826	MDM34	339	95	-2.16695
orf19.1830		1	30	20.081
orf19.1832	FCY23	7	241	14.0941
orf19.1833		11	178	10.2442
orf19.1834		4	14	7.98252
orf19.1835	PEA2	18	88	5.69541
orf19.1836	APN2	1	8	12.3396
orf19.1839	RPA19	36	769	23.2823
orf19.1842	BUD5	18	87	6.93179
orf19.1843	ALG6	3	43	3.53249
orf19.1844		2	11	7.76078
orf19.1849		15	27	3.49235
orf19.1850	SIW14	0	6	2.97497
orf19.1854	HHF22	140	74	4.38911
orf19.1855		4	53	6.77927
orf19.1856		2	10	4.65647
orf19.1857		6	14	6.15319
orf19.1860	LSC2	43	78	2.66206
orf19.1861		85	27	-2.07973
orf19.1862		9	0	-12.0263
orf19.1864		16	29	2.57331
orf19.1871		43	117	6.00319
orf19.188		8	71	6.56562
orf19.1881		11	20	9.40025
orf19.1883	YCS4	29	55	9.73202
orf19.1886	RCL1	1	33	21.7302
orf19.1887		1	9	7.56676
orf19.1888		1	4	2.03721
orf19.1890		13	21	2.60762
orf19.1896	SSC1	197	625	3.44303
orf19.1901	MCM3	2	24	8.88962
orf19.1902	NOC4	5	53	6.58083
orf19.1923	RRN3	0	19	10.3477
orf19.1926	SEF2	7	17	3.59818
orf19.1930	CFL5	0	16	75.0856
orf19.1932	CFL4	4	10	3.49235
orf19.1933		5	30	6.87888
orf19.1942	SGE1	11	49	4.35605
orf19.1943		9	22	3.05581
orf19.1945	AUR1	60	74	2.242
orf19.1946		1	4	2.91029
orf19.1956		8	31	3.19151
orf19.1961		7	80	13.8967
orf19.1963	GDS1	41	138	3.64326
orf19.1964		12	59	7.36133
orf19.1971	TRY3	2	22	-3.01601
orf19.1977	URA4	7	17	6.29993
orf19.1978	GIT2	20	170	9.26982
orf19.1979	GIT3	30	122	3.43214
orf19.198	ASN1	30	1060	35.3892
orf19.1980	GIT4	2	12	13.9694
orf19.1985		3	20	7.17872
orf19.1988	CDC45	2	20	17.6281
orf19.199		7	28	3.01301
orf19.1991		32	39	3.00047
orf19.1992	SIR2	6	26	3.04461
orf19.1994		12	30	4.08629
orf19.1998		4	19	3.04461
orf19.2000		1	21	22.9913
orf19.2002		33	114	-2.11599
orf19.2003	HNM1	81	366	19.7062
orf19.2007		15	28	6.45254
orf19.2012	NOT3	17	28	2.82075
orf19.2013	KAR2	446	843	2.61032
orf19.202	CDC47	6	26	5.67507
orf19.2020	HGT6	514	119	-3.30236
orf19.2023	HGT7	372	789	2.4338
orf19.2024		2	5	5.23853
orf19.2038		1	6	18.2378
orf19.204		5	10	2.24508
orf19.2040		4	17	4.48185
orf19.2041		5	21	6.07928
orf19.2044	PGA27	0	14	14.9395
orf19.2049		1	5	-2.89919
orf19.2051		2	36	33.7594
orf19.2054	FGR15	3	10	2.32823
orf19.2057		43	143	3.00937
orf19.2059		10	26	4.98907
orf19.206		20	63	3.44579
orf19.2063		10	82	6.31446
orf19.2064		11	21	3.91567
orf19.2069	SMF3	5	31	4.81169
orf19.207	PGA55	33	108	4.26843
orf19.2070		3	18	2.80446
orf19.2072		4	10	5.58776
orf19.2073		23	54	3.99126
orf19.2077	ZCF9	11	17	3.34051
orf19.2081	POM152	22	70	2.85209
orf19.2088		0	14	8.43985
orf19.2090		18	234	12.8804
orf19.2094	PDR6	17	115	4.65647
orf19.2097		12	42	6.82414
orf19.2098	ARO8	21	100	11.7336
orf19.2111		1	4	2.25768
orf19.2119	NDT8	29	38	2.43969
orf19.2124		7	48	2.10776
orf19.2131		7	15	2.49454
orf19.2135	TSM1	65	106	2.19777
orf19.2138	ILS1	137	659	6.74721
orf19.2143		9	48	8.08034
orf19.2149		3	17	2.24508
orf19.2160	NAG4	0	7	27.9388
orf19.2168.3		2	11	6.33797
orf19.217		2	9	10.7099
orf19.2170	PHM7	244	658	2.60762
orf19.2173	MAF1	9	1	-3.24519
orf19.2179	SIT1	18	175	6.51043
orf19.2182	BLM3	236	390	2.11852
orf19.2183	KRE3	14	582	24.3546
orf19.2187	ALG7	0	7	3.958
orf19.2192	GDH2	1683	218	-4.70099
orf19.2193	PRS5	18	44	4.22408
orf19.2197		0	6	10.4771
orf19.2198	FLC3	16	62	4.65647
orf19.2199	PHO86	2	15	3.91273
orf19.22		0	9	11.4957
orf19.22.1		1	8	22.1182
orf19.220	PIR1	182	46	-2.37712
orf19.2204		15	26	4.81704
orf19.2204.2	RHO2	5	17	4.32386
orf19.2208		63	196	4.16001
orf19.2210		29	41	3.00586
orf19.2215	GLE1	19	88	4.47458
orf19.2216	PDS5	17	32	2.37885
orf19.2222		3	20	4.65647
orf19.223		22	37	3.69481
orf19.2232	RPL11	58	322	5.90508
orf19.2236	FHL1	11	123	7.32963
orf19.2237.1		0	5	16.0066
orf19.2238	LTE1	10	93	7.05123
orf19.2242	PRB1	37	123	2.83705
orf19.2247		0	5	8.14882
orf19.2249		7	15	2.00487
orf19.225		4	23	3.73743
orf19.2250	SPE3	20	27	2.03721
orf19.2252		1	6	5.43255
orf19.2257		4	9	2.45758
orf19.2264	OLE2	10	28	5.43255
orf19.2266		6	20	2.56106
orf19.2270	SMF12	25	63	2.85999
orf19.2272	AFT2	15	45	4.85892
orf19.2280	ZCF1	1	46	22.4093
orf19.2281		2	22	8.14882
orf19.2284		1	4	8.32792
orf19.2288	CCT5	39	114	2.19664
orf19.229		7	22	5.94101
orf19.2296		2912	373	-5.24919
orf19.23	RTA3	4	18	6.40265
orf19.230		12	39	3.78338
orf19.2308		5	51	33.7594
orf19.2309	PET127	11	56	4.73408
orf19.2309.2	RPL2	0	12	4.53858
orf19.231	APL2	6	59	11.0591
orf19.2311	RPL82	0	14	11.112
orf19.2313		2	7	7.46975
orf19.2315		1	19	8.90998
orf19.2319		6	110	8.29079
orf19.2320		1	6	5.04451
orf19.2324	UBA4	0	8	4.51951
orf19.2326		1	7	3.90322
orf19.2329.1	RPS17B	0	10	9.28455
orf19.2333		14	19	4.38484
orf19.2334	BIG1	1	4	2.76478
orf19.2336		0	5	10.2442
orf19.2337	ALP1	2	128	81.8763
orf19.2344	ASR1	68	4	-17.1804
orf19.2346		11	49	2.19595
orf19.2347	MNN2	3	55	27.5508
orf19.2351	NIT3	0	20	52.1525
orf19.2356	CRZ2	2	75	15.2629
orf19.2360	URA2	103	1280	14.4957
orf19.2361	SPT1	2	10	8.61447
orf19.2363		0	5	71.0112
orf19.2364	MIS11	101	782	7.48024
orf19.2365	POL2	31	150	5.62102
orf19.2366		3	10	4.65647
orf19.2368		0	9	18.3931
orf19.2370	DSL1	8	20	3.12195
orf19.2379	NOT4	0	11	14.7455
orf19.238	CCP1	121	155	2.90433
orf19.2382		4	29	5.20789
orf19.239		104	250	3.06451
orf19.2395	IME2	0	8	48.3109
orf19.2398		28	8	-2.16473
orf19.2399		1	8	17.4618
orf19.2400		15	22	4.92104
orf19.2404		2	22	-2.05105
orf19.2407	DPS1-1	17	37	4.35012
orf19.2410	SYS3	11	29	3.74181
orf19.2411	SYN8	2	10	3.78338
orf19.2417	SMC5	9	76	8.94532
orf19.2422	ARC1	2	10	3.35266
orf19.2432	HAC1	18	119	12.8559
orf19.2435	MSI3	81	527	7.36588
orf19.2436		14	40	3.12857
orf19.2440		2	14	5.23853
orf19.2443	RGD1	5	28	9.24827
orf19.2444	CHS7	1	18	13.7754
orf19.2445		5	10	2.36579
orf19.2447		4	29	29.5078
orf19.2451	PGA45	11	45	4.3331
orf19.2452		8	31	6.35787
orf19.2454	PHO87	8	84	11.6813
orf19.2455		12	87	12.189
orf19.2457		5	11	2.06366
orf19.2460		4	14	9.02191
orf19.2461	PRN4	17	47	5.5169
orf19.247		2	5	4.15756
orf19.2473		5	12	3.85997
orf19.2474	PRC3	78	161	2.35439
orf19.2476		31	180	4.52948
orf19.2478.1		0	6	4.0215
orf19.2479	UGA4	1	12	6.9847
orf19.248	APL5	18	76	4.55064
orf19.2485		58	150	2.47898
orf19.2489		62	479	8.27582
orf19.2495	GSL1	7	40	7.27573
orf19.250	SLC1	1	16	7.31731
orf19.2503		1	5	5.23853
orf19.2504	BMS1	23	359	23.4376
orf19.251		155	404	3.13154
orf19.2510		3	26	12.3576
orf19.2511.2		1	5	7.52796
orf19.2513		5	15	13.1477
orf19.2516		4	20	10.8263
orf19.2517		1	5	3.91567
orf19.252		0	6	9.31294
orf19.2521		15	51	3.74309
orf19.2525	LYS12	0	6	11.1755
orf19.2527		0	6	6.58174
orf19.2528		17	53	5.15538
orf19.2533.1		3	19	6.46732
orf19.2534	PIN4	27	43	3.93128
orf19.2537		4	33	26.0339
orf19.2538	PTC2	28	228	16.4224
orf19.2539		14	98	6.64163
orf19.2540	SAS3	7	61	8.48302
orf19.2541		1	4	6.40265
orf19.2545	DOT6	9	32	10.3477
orf19.2546	TRP2	3	63	18.1085
orf19.2547		3	26	11.0591
orf19.2551	MET6	424	1642	4.4188
orf19.2552		1	15	3.0766
orf19.2553		0	5	3.49235
orf19.2555	URA5	0	6	5.82059
orf19.2559	CDC4	80	127	2.50411
orf19.2560	CDC6	121	1027	10.5636
orf19.2563		13	34	2.68642
orf19.2565		16	43	3.12714
orf19.2571	SEC4	1	7	2.24038
orf19.2573	FRS1	37	226	5.12639
orf19.2579		2	21	8.14882
orf19.2582		39	83	2.39987
orf19.2583	PTR2	1	5	16.2976
orf19.260	SLD1	3	7	4.11918
orf19.2600	SPC98	7	31	5.18561
orf19.2601	HEM1	15	89	5.41762
orf19.2602	OPT1	17	48	3.80278
orf19.2604		9	33	3.42387
orf19.2606	HDA1	12	75	6.27792
orf19.2607		1	5	2.91029
orf19.2608	ADH5	107	4	-13.2095
orf19.2609	CET1	8	25	2.35249
orf19.2611	MCM6	4	14	3.80278
orf19.2614	RSR1	8	16	2.22701
orf19.2615	MDL1	12	20	3.56083
orf19.2616	UGT51C1	18	147	11.7097
orf19.2618	MET2	9	152	15.5992
orf19.2619	PHO113	2	14	5.04451
orf19.262	SMC3	10	22	3.68637
orf19.2624		4	10	15.1335
orf19.263.1		37	145	5.39295
orf19.2631		0	21	87.3088
orf19.2633	HGT14	3	122	39.3213
orf19.2637		0	6	4.75512
orf19.2641	ARP1	1	4	11.6412
orf19.2644	QCR2	37	78	3.43497
orf19.2646	ZCF13	31	56	2.79388
orf19.2647	ZCF14	1	16	16.1313
orf19.2649	PCL1	2	18	13.1933
orf19.265		3	46	39.871
orf19.2650		23	48	3.8005
orf19.2650.1		2	5	7.66377
orf19.2653		17	55	4.36544
orf19.2654	RMS1	3	49	26.3867
orf19.2660	EAF3	1	17	27.3568
orf19.2663		8	22	3.49235
orf19.2664		33	52	3.43692
orf19.267		15	87	7.85779
orf19.2671		1	5	2.52225
orf19.2672	NCP1	34	265	8.14882
orf19.2673		2	5	5.23853
orf19.2675		14	26	3.58936
orf19.2678	BUB1	5	23	4.33898
orf19.268		1	35	14.7843
orf19.2680		27	65	2.68394
orf19.2681	RBT7	1	13	15.7156
orf19.2682		14	20	2.49454
orf19.2684		3	29	5.937
orf19.2685	PGA54	209	378	2.40009
orf19.2686		36	53	2.49654
orf19.2687.1		0	5	5.23853
orf19.2688	NAN1	5	68	11.2337
orf19.2691		7	19	2.66777
orf19.2694	TYS1	3	56	14.3574
orf19.2695	UBR1	64	223	4.19867
orf19.2697		47	115	2.68895
orf19.2711		16	105	3.9543
orf19.2712	HCA4	3	49	8.82278
orf19.2713		0	7	6.69368
orf19.2717	SAS1	3	22	11.0868
orf19.272	FAA21	49	145	6.90622
orf19.2720		0	22	11.6412
orf19.2723	HIT1	0	6	5.29144
orf19.2725		1	20	9.895
orf19.2726		2	10	5.92642
orf19.2727	GRX3	0	7	20.9541
orf19.273		11	38	3.9289
orf19.2737		652	167	-2.40891
orf19.2738	SUL2	4	83	16.7454
orf19.274	TFC4	22	55	3.10431
orf19.2740		1	14	13.9694
orf19.2746	EMP7	21	99	6.9847
orf19.2748	ARG83	34	108	3.12857
orf19.2749		3	32	12.4173
orf19.2753	ZCF15	30	45	3.20132
orf19.2755		1	6	2.01075
orf19.2760		19	137	6.07928
orf19.2761		2	17	14.2604
orf19.2762	AHP1	6	0	-17.0372
orf19.2765	PGA62	720	1808	3.25907
orf19.2768	AMS1	629	1499	2.67044
orf19.2771	BEM3	14	51	14.6679
orf19.2774	LAB5	11	85	9.40249
orf19.2775	IDI1	7	25	2.76478
orf19.2778		19	48	5.67134
orf19.2779		20	33	5.11199
orf19.2781		61	124	2.58863
orf19.2782		2	42	13.9694
orf19.2783	PIR32	1	13	13.3874
orf19.2799	GPI8	6	0	-7.4999
orf19.2800		0	6	9.50172
orf19.2803	HEM13	43	7	-2.73124
orf19.2805	PEX8	23	44	2.29068
orf19.2809	CTN3	162	99	-2.03242
orf19.2810	AAP1	13	45	5.31445
orf19.2818		0	47	16.0648
orf19.2823	RFG1	61	2522	40.836
orf19.2825	DRE2	18	147	8.69208
orf19.2826		14	47	4.37622
orf19.2827		4	480	44.9479
orf19.2830	RRP9	1	54	72.1753
orf19.2834	RPD3	10	48	6.9847
orf19.2839	CIRT4B	25	6	-2.83477
orf19.2842	GZF3	18	36	2.27145
orf19.2843	RHO1	25	153	9.48632
orf19.2847		4	42	12.5558
orf19.2848		24	88	11.4295
orf19.2849	AQY1	33	17	2.4495
orf19.2850		56	170	3.57795
orf19.2857		20	36	3.42885
orf19.2862	RIB1	8	1	5.02409
orf19.2864.1	RPL28	0	6	6.27918
orf19.2871	SDH12	106	547	4.76106
orf19.2873	TOP2	35	80	2.91925
orf19.2879	IFF5	33	71	2.67432
orf19.288	MET13	24	185	8.91469
orf19.2881	MNN4	147	488	3.74572
orf19.2882	XUT1	1	92	36.0876
orf19.2883	CSO99	2	29	14.4986
orf19.2884	CDC68	43	91	2.52086
orf19.2885	PRI2	4	22	6.6521
orf19.2886	CEK1	15	78	6.41881
orf19.2887		17	24	3.69561
orf19.2891		4	12	8.76968
orf19.2892		31	172	6.9265
orf19.2893		8	52	3.79416
orf19.2898		6	70	12.4173
orf19.290	KRE5	38	90	2.48698
orf19.2903	AGO1	77	183	2.6888
orf19.2911	SEC3	13	21	2.4888
orf19.2917		1	22	24.4465
orf19.2923		1	5	4.65647
orf19.2925		0	6	5.23853
orf19.2926		1	20	4.93038
orf19.2927	MNN11	1	47	114.86
orf19.2928		4	19	8.23837
orf19.2929	GSC1	444	1734	4.4822
orf19.2930		6	62	8.53686
orf19.2933		1	6	3.49235
orf19.2934		3	15	5.12212
orf19.2935	RPL1	24	59	3.36981
orf19.2937	PMM1	0	5	8.29434
orf19.2938		4	37	11.2337
orf19.2939		1	5	8.43985
orf19.2945	PUT4	7	42	5.07223
orf19.2946	HNM4	3	7	4.90592
orf19.2947	SNZ1	13	147	19.3215
orf19.2949	IML1	26	43	3.68936
orf19.2951	HOM6	2	86	31.7855
orf19.2956	MGM11	2	6	2.32823
orf19.2958		7	26	5.56189
orf19.2959		4	11	4.07441
orf19.2959.1		60	10	-3.72242
orf19.2960	FRS2	22	206	11.9994
orf19.2969	RAD16	32	55	2.10532
orf19.2970	LYS2	59	1267	25.1423
orf19.2971		6	27	3.65865
orf19.2972	PDE2	23	96	5.49945
orf19.2980		1	11	9.57163
orf19.2988		23	212	8.34697
orf19.2989	GOR1	14	29	2.42136
orf19.2990	XOG1	10	61	6.61709
orf19.2991	HOL1	5	35	14.7334
orf19.2994	RPL13	2	5	5.72151
orf19.2994.1	RPS16A	37	109	3.0022
orf19.2996		26	60	3.63787
orf19.30	SPF1	64	217	4.70999
orf19.300	AIP2	33	301	8.3503
orf19.3003.1	RPL6	72	354	5.68301
orf19.3007		0	5	5.58776
orf19.3009		1	7	2.10996
orf19.301	PGA18	9	26	2.71627
orf19.3010.1	ECM33	114	272	3.76952
orf19.3012	ARO8	6	43	10.9136
orf19.3015	ARX1	8	149	11.1977
orf19.3016		0	7	6.20863
orf19.3019		0	20	2.36981
orf19.3026	MAS1	0	15	11.874
orf19.3030		0	21	8.38165
orf19.3034	RLI1	16	257	18.9434
orf19.3037		82	409	6.46844
orf19.3038	TPS2	466	106	-2.94115
orf19.304		2	24	9.31294
orf19.3040	EHT1	15	70	9.09467
orf19.3051		5	9	2.108
orf19.3053		0	6	2.07358
orf19.306	USO5	2	11	7.41359
orf19.3077	VID21	14	43	2.34642
orf19.308		8	71	13.1228
orf19.309	DAL5	3	8	3.68637
orf19.3091		15	142	16.5093
orf19.3098		56	122	2.34141
orf19.31		6	16	3.55362
orf19.3100		1	11	19.402
orf19.3103		63	278	4.43519
orf19.3110		8	30	2.49454
orf19.3126	CCT6	36	202	6.61318
orf19.3129		4	8	6.07524
orf19.313	DAL4	0	6	25.6106
orf19.3131	OYE32	8	15	8.14882
orf19.3133	GUT2	68	540	12.5936
orf19.3136		2	5	2.06954
orf19.3138	NOP1	18	64	6.43249
orf19.3141		23	34	5.87473
orf19.3142		1	40	114.084
orf19.3147		2	6	9.31294
orf19.3148		10	27	3.82496
orf19.3150	GRE2	18	23	2.26171
orf19.3152	AMO2	16	306	20.0937
orf19.3153	MSS4	27	83	6.40934
orf19.3156		26	52	2.88119
orf19.3158		11	26	2.67062
orf19.3159	UTP2	22	368	14.1966
orf19.3160	HSP12	6	0	-11.382
orf19.3167		2	10	2.68394
orf19.3170		9	60	3.5819
orf19.3171	ACH1	228	439	2.38183
orf19.3175		51	233	6.27968
orf19.3180		2	44	34.1827
orf19.3181.1		12	61	5.36326
orf19.3185		7	15	2.3954
orf19.3188	TAC1	15	48	3.72518
orf19.3190	HAL9	19	63	5.21846
orf19.3192	STI1	49	93	3.35125
orf19.3193	FCR3	11	38	4.16396
orf19.3195	HIP1	57	155	4.13539
orf19.3202		4	23	3.90811
orf19.3203	RCY1	2	26	24.4465
orf19.3204		7	33	6.52918
orf19.3206	CCT7	3	103	40.5501
orf19.3207	CCN1	6	16	5.98689
orf19.3209	FGR42	5	28	11.8352
orf19.321		5	53	3.42387
orf19.3213		44	51	7.50209
orf19.3214		38	527	14.7251
orf19.3215		60	75	3.23928
orf19.3216		16	67	8.94042
orf19.3218		8	52	6.20863
orf19.3219		4	68	21.0269
orf19.3221	CPA2	10	152	3.97877
orf19.3222		7	51	6.45556
orf19.3226		2	22	9.02191
orf19.3227	FTH2	5	42	6.70753
orf19.3228		3	33	9.77859
orf19.3229		4	30	5.82059
orf19.323		53	170	3.84966
orf19.3230	BOI2	17	96	8.76152
orf19.3231	CDC27	15	90	8.53686
orf19.3232		81	12	-3.04236
orf19.3234	OYE22	1	7	6.9847
orf19.3234.1	SFT1	1	4	2.16193
orf19.3237		90	234	3.63453
orf19.3239	CTF18	2	15	34.9235
orf19.3247		78	256	3.74181
orf19.3249	LAG1	5	23	10.0405
orf19.325		15	52	4.32386
orf19.3250		12	24	4.77288
orf19.3252	DAL81	3	35	10.6434
orf19.3254		0	20	32.5953
orf19.3256	SLN1	40	93	2.77475
orf19.3260		36	105	5.38874
orf19.3264	CCE1	2	8	9.2321
orf19.3264.1		49	524	10.2493
orf19.3265	TRM1	1	62	62.2803
orf19.3269	GSL2	32	56	2.66566
orf19.3276	PWP2	12	103	12.0025
orf19.3278	GSY1	1006	324	-2.00741
orf19.328	NPR2	15	27	3.05257
orf19.3281		8	17	5.0331
orf19.3287	BUD22	1	5	6.9847
orf19.3288	NMA111	9	149	16.4701
orf19.3295		1	5	3.61889
orf19.3298	CCH1	119	330	3.60876
orf19.3301		26	136	7.70108
orf19.3303		23	61	4.17142
orf19.3305	ZCF17	4	37	12.1068
orf19.3306		1	6	6.9847
orf19.3308	STB5	15	21	3.25953
orf19.3312		1	7	2.74732
orf19.3315	CTA9	2	8	5.92642
orf19.332		5	14	3.71409
orf19.3324	TIF	110	175	2.31697
orf19.3325		73	121	2.60291
orf19.3328		2	10	22.1182
orf19.3329		14	32	2.55538
orf19.333	FCY2	21	27	-8.15155
orf19.3330	CRL1	2	23	16.2976
orf19.3331	ABC1	14	171	17.3933
orf19.3332		49	89	2.57331
orf19.3333		5	14	3.74542
orf19.3334	RPS21	46	86	2.60813
orf19.3338		3	20	7.46975
orf19.334		10	41	5.66184
orf19.3340	SOD2	26	43	2.37997
orf19.3341		35	238	6.44576
orf19.3344	VPS17	1	4	8.14882
orf19.3345	SIZ1	27	87	6.66357
orf19.3349		104	192	2.98492
orf19.335		11	22	3.34051
orf19.3350	MRP2	1	4	5.33554
orf19.3352		3	16	7.56676
orf19.3356	ESP1	11	60	4.34305
orf19.3358	LSC1	40	117	4.23315
orf19.3359	ARP8	22	50	6.94943
orf19.3363	VTC4	66	233	4.98546
orf19.3365	DAO2	8	33	5.93146
orf19.3369	MOH1	33	68	2.58503
orf19.3370	DOT4	7	106	17.1292
orf19.3374	ECE1	8	377	42.7047
orf19.3378		1	7	6.9847
orf19.3380	HWP2	2	10	4.26843
orf19.339	NDE1	55	259	5.74548
orf19.3391	ADK1	8	0	-2.22564
orf19.3393		2	5	11.1319
orf19.3395		5	44	8.59656
orf19.34	GIT1	20	144	10.6168
orf19.3406		1	39	13.7754
orf19.3409	SEC12	25	58	2.62865
orf19.3418		0	5	2.32823
orf19.3419	MAE1	13	200	16.2976
orf19.3423	TIF3	6	144	16.123
orf19.3426	ANB1	122	360	4.17325
orf19.3428		58	93	3.61676
orf19.3429	FGR47	25	84	5.03481
orf19.3430		58	96	2.63729
orf19.3431		37	86	2.34463
orf19.3432		4	42	8.43985
orf19.3433	OYE23	4	27	12.4727
orf19.3437		1	6	6.01461
orf19.3438		1	61	15.5216
orf19.3439		7	22	4.52215
orf19.344		0	14	9.895
orf19.3440	FRP5	18	94	7.5974
orf19.3441	FRP6	33	69	3.27893
orf19.3443	OYE2	0	8	181.214
orf19.3445	HOC1	4	37	16.086
orf19.3447		1	8	7.9548
orf19.3449		12	36	5.35494
orf19.345		3	14	4.07441
orf19.3450.1		1	24	47.8951
orf19.3453		12	23	2.2728
orf19.3460		1	7	5.82059
orf19.3461		1	12	11.0591
orf19.3462	SAR1	38	88	2.44465
orf19.3463		10	136	6.5202
orf19.3467	SEC27	63	151	2.83823
orf19.3468	ALG11	14	33	2.67316
orf19.3469		3	11	9.66217
orf19.347	RSN1	76	13	-2.00438
orf19.3470		3	81	17.3648
orf19.3471		2	10	12.262
orf19.3473		3	12	7.88018
orf19.3474	IPL1	1	13	31.4312
orf19.3475		71	524	9.33622
orf19.3476	HRR25	87	133	2.05876
orf19.3477		5	20	7.45035
orf19.3478	NIP7	1	5	10.4771
orf19.348	SKN2	27	39	2.31229
orf19.3480		0	6	41.6172
orf19.3483		2	57	66.9368
orf19.349		7	35	5.07038
orf19.3494	CTF5	0	5	9.31294
orf19.3498		6	11	3.0766
orf19.35.1		16	29	3.02671
orf19.3501		10	61	6.45115
orf19.3505		55	60	2.92503
orf19.3518		41	59	2.24357
orf19.3526	ITR1	9	21	3.20132
orf19.3527	CYT1	164	350	3.26232
orf19.3528		0	12	33.7594
orf19.3536		0	18	11.874
orf19.3538	FRE9	1	13	60.5341
orf19.3540	MAK5	4	68	13.8799
orf19.3545		13	32	2.04367
orf19.3547		3	45	5.47135
orf19.3552		14	56	13.8239
orf19.3556		5	143	26.5419
orf19.356	GTT13	1	10	6.9847
orf19.3561	CDC7	2	18	11.7382
orf19.3564	RPC4	1	47	9.47924
orf19.3568	RXT3	39	49	2.54315
orf19.3569		10	45	4.9475
orf19.3575	CDC19	327	59	-2.59441
orf19.3586		8	14	2.32823
orf19.3591	APE3	16	64	3.46485
orf19.3599	TIF4631	96	200	3.46528
orf19.36		1	14	2.32823
orf19.3601		3	13	6.2439
orf19.3603	MFG1	6	44	7.42125
orf19.3604		7	36	8.55052
orf19.3605	PEX17	2	18	12.3526
orf19.3606		2	15	7.99008
orf19.3608	MSH3	9	30	5.68089
orf19.3609	UTP15	9	55	13.4601
orf19.3610		6	22	6.01461
orf19.3615		1	10	3.29833
orf19.3616	ERG9	15	55	2.27532
orf19.3617	GTR1	6	53	6.89516
orf19.3618	YWP1	69	1642	22.9819
orf19.3621		2	9	13.3874
orf19.3622	ANP1	24	95	4.78582
orf19.3623	SMC2	12	31	2.85209
orf19.3624	MSU1	13	137	9.64554
orf19.3626		1	14	10.4771
orf19.3628	RSP5	128	155	2.49897
orf19.3629	DSE1	73	78	2.31572
orf19.3630	RRP8	3	114	16.721
orf19.3635		40	109	8.523
orf19.3638	PGA46	0	9	37.2518
orf19.3644		59	28	-2.57706
orf19.3651	PGK1	1064	241	-2.23817
orf19.3653	FAT1	15	41	4.65647
orf19.3655		1	4	3.20132
orf19.3658		1	5	2.03721
orf19.3663	PHO91	38	97	3.85452
orf19.3664	HSP31	34	5	-2.19527
orf19.3667		1	4	3.88039
orf19.367	CNH1	17	30	2.32823
orf19.3674	GAL12	1	6	3.34684
orf19.3677		1	4	15.1335
orf19.3680	SEP7	18	36	5.26384
orf19.3681		45	362	7.91236
orf19.3683	AGE3	1	29	7.47335
orf19.3689		17	31	2.53611
orf19.3690.2		14	92	6.95631
orf19.3693	PGA5	2	12	5.5031
orf19.3694		9	54	6.01461
orf19.3695		15	30	3.74542
orf19.3697		8	16	3.09093
orf19.3698		2	46	20.6215
orf19.3700	TOM7	14	171	8.01385
orf19.3704		0	7	52.3853
orf19.3706		7	26	6.9847
orf19.3707	YHB1	78	175	3.42804
orf19.3708	SAP2	6	29	7.64991
orf19.3710	YHB5	34	428	9.05232
orf19.3711		2	13	11.3825
orf19.3714		4	26	19.0139
orf19.3715	ASF1	2	5	5.82059
orf19.3720		13	53	4.7623
orf19.3721		0	7	7.64991
orf19.3722		59	462	9.83032
orf19.3726		8	33	4.98907
orf19.3727	PHO112	1	6	16.2976
orf19.3733	IDP2	78	661	9.04722
orf19.3734	GEF2	44	66	3.17122
orf19.3737		13	66	4.80198
orf19.3740	PGA23	20	2	-5.01095
orf19.3744		6	23	5.18561
orf19.3749	IFC3	122	337	3.0943
orf19.3751		66	187	4.15242
orf19.3753	SEF1	15	75	8.43985
orf19.3756	CHR1	8	41	11.1039
orf19.3763		0	6	16.6857
orf19.3764	GSG1	1	16	11.8075
orf19.3765	RAX2	27	153	8.37749
orf19.3767	PEP1	122	204	2.20124
orf19.377	PHR3	1	4	3.36301
orf19.3770	ARG8	0	32	19.6237
orf19.3773	CDL1	6	93	14.1064
orf19.3774	PPG1	0	5	19.499
orf19.3775	SSK2	98	266	13.146
orf19.3781		4	11	3.08149
orf19.3782		3	16	2.97497
orf19.3782.2		9	59	4.96989
orf19.3788	SPC34	0	7	51.2212
orf19.3792		32	59	2.14914
orf19.3793		6	14	2.23869
orf19.3795	AGP3	11	22	5.82059
orf19.3796	DCR1	7	14	4.98907
orf19.3798		2	6	7.56676
orf19.3799		20	201	5.97042
orf19.3801	FAV1	1	20	5.01466
orf19.3802	PMT6	12	28	2.48345
orf19.3803	MNN22	17	32	3.68637
orf19.3806		2	8	2.08316
orf19.3809	BAS1	4	28	7.68317
orf19.3812	SSZ1	42	118	3.13518
orf19.3813		15	45	2.42524
orf19.3823	ZDS1	38	183	6.65524
orf19.3825	RCE1	6	36	8.29434
orf19.3826		16	27	2.21182
orf19.3827		19	27	2.73568
orf19.3829	PHR1	157	253	2.55509
orf19.3836		1	10	2.47844
orf19.3839	SAP1	1	12	6.79068
orf19.3840		70	130	2.4636
orf19.3841		29	132	5.32168
orf19.3846	LYS4	29	196	7.04938
orf19.3848		5	12	2.41778
orf19.385	GCV2	27	515	18.2378
orf19.3851		2	8	3.68637
orf19.3852		12	40	6.19611
orf19.3854		25	100	4.94156
orf19.3856	CDC28	8	19	2.77597
orf19.386	SAM4	6	219	21.8537
orf19.3863		0	17	7.98252
orf19.3865	RFX1	10	28	4.42365
orf19.3867	RPL7	6	76	18.127
orf19.3868		0	9	6.40265
orf19.3869		1	34	26.3867
orf19.387	GCR3	20	60	3.03854
orf19.3870	ADE13	26	151	6.45756
orf19.3871	DAD3	0	10	45.4006
orf19.3873	ARC4	0	5	5.12766
orf19.3874		1	18	16.6857
orf19.3876	ZCF19	0	6	12.2232
orf19.3878		9	28	7.72551
orf19.3886		6	12	4.44481
orf19.3894		1	8	8.14882
orf19.3895	CHT2	74	10	-3.46134
orf19.3900		15	54	2.62603
orf19.3901		8	82	7.93055
orf19.3902		19	182	14.2145
orf19.3911	SAH1	90	165	2.17222
orf19.3912	GLN3	19	33	2.43737
orf19.3914		6	92	21.5362
orf19.3919		5	16	2.68951
orf19.3924		6	20	5.76515
orf19.3931	SFC1	2	25	5.07038
orf19.3934	CAR1	5	0	-5.26425
orf19.3936		55	122	2.17001
orf19.3941	URA7	47	144	3.12324
orf19.3944	GRR1	35	82	2.96321
orf19.3945		6	24	4.96989
orf19.395	ENO1	1448	380	-2.87792
orf19.3950	MSM1	6	14	2.76478
orf19.3952	SRP11	11	26	4.5952
orf19.3954	PSD2	26	41	2.86373
orf19.3955	MES1	53	453	10.4771
orf19.3957		2	6	3.99126
orf19.3959	SSD1	229	448	2.25574
orf19.3962	HAS1	3	69	13.2162
orf19.3966	CRH12	2	10	3.05581
orf19.3968		2	35	14.697
orf19.3970		0	14	12.0292
orf19.3971		1	10	29.1029
orf19.3972		4	50	37.3223
orf19.3980		65	126	2.70334
orf19.3981	MAL31	56	13	-3.25523
orf19.3983		14	136	16.7633
orf19.3986	PPR1	22	33	3.32605
orf19.3988		31	8	-2.02483
orf19.3991		1	23	27.9388
orf19.3995	RIM13	0	10	10.089
orf19.3996		4	13	5.0057
orf19.3997	ADH1	751	123	-4.21224
orf19.3998		2	5	2.66084
orf19.4000	GRF1	13	29	2.84045
orf19.401	TCP1	16	47	2.51084
orf19.4010	PAN3	10	35	3.72518
orf19.4011		3	7	6.79068
orf19.4012	PCL5	0	21	42.4071
orf19.4016		4	15	2.4592
orf19.4026	HIS1	1	6	8.78077
orf19.4029		0	5	6.88769
orf19.4033	PRP22	11	40	3.94009
orf19.4040	ILV3	12	201	15.493
orf19.4051	HTS1	5	100	5.45019
orf19.4059		8	15	2.60762
orf19.406	ERG1	37	45	2.27409
orf19.4060	ARO4	11	317	19.0469
orf19.4064	GPI7	6	27	13.7754
orf19.4067	FGR18	0	8	9.70098
orf19.4068		4	12	3.06904
orf19.407	GCD6	20	84	5.33166
orf19.4070		0	7	18.6259
orf19.4076	MET1	66	556	9.01445
orf19.4077	MIT1	11	53	8.09062
orf19.4080		0	7	23.6704
orf19.4082	DDR48	0	19	-2.56186
orf19.4093	PES1	4	32	12.4173
orf19.4097		5	40	12.3687
orf19.4099	ECM17	108	1259	13.7163
orf19.411		123	25	-2.34489
orf19.4110		14	30	3.63787
orf19.4119	SPO72	55	226	3.3386
orf19.412	SSH1	4	20	7.63144
orf19.4120	LAS1	8	14	3.06904
orf19.4122		1	42	37.6398
orf19.413.1	RPS27A	0	10	14.3574
orf19.4136	YBL53	1	11	14.7455
orf19.414	RSM22	6	83	5.47135
orf19.4144		0	14	14.3574
orf19.4145	ZCF2	5	65	10.1596
orf19.4152	CEF3	531	2356	5.46851
orf19.4160		0	12	45.4006
orf19.4162	MLH1	1	14	15.7156
orf19.4163		42	48	2.70376
orf19.4166	ZCF21	6	25	4.5952
orf19.4167		1	5	9.895
orf19.417	MTM1	0	5	23.2823
orf19.4170	CSP2	2	5	4.65647
orf19.4171		8	32	5.2833
orf19.4175	TOK1	6	64	6.08345
orf19.4188	NMD5	19	178	3.76209
orf19.4201	NHX1	19	26	2.30116
orf19.4208	RAD52	2	9	9.60397
orf19.4212	FET99	2	5	3.78338
orf19.4213	FET31	10	32	3.06904
orf19.4215	FET34	19	174	8.16855
orf19.4222	SST2	3	16	14.9966
orf19.4225	LEU3	10	79	8.73088
orf19.4232	PTH1	2	23	6.40265
orf19.4233	THR4	4	22	4.14849
orf19.4234		2	31	12.2232
orf19.4236	RET2	0	5	10.4771
orf19.4240		2	7	3.42768
orf19.4242	CST2	58	197	4.10865
orf19.4253		3	12	4.21993
orf19.4257	INT1	83	150	4.66885
orf19.426		1	7	5.48798
orf19.4261	TIF5	9	173	10.0696
orf19.4263		13	29	4.60796
orf19.4264		10	36	3.38652
orf19.4265	UAP1	2	11	26.1479
orf19.4266	SPR28	0	13	23.2096
orf19.4268	UTP13	0	65	45.9826
orf19.427		14	54	2.87966
orf19.4270	MNN13	5	27	5.70418
orf19.4273		8	167	14.8317
orf19.4275	RAD9	17	41	6.42795
orf19.4278		20	60	3.2487
orf19.4279	MNN1	18	41	2.97497
orf19.428		3	17	4.99886
orf19.4282	IFH1	29	300	10.1803
orf19.4283		7	76	6.71308
orf19.4284	BUR2	2	12	7.10112
orf19.4288	CTA7	33	63	2.57517
orf19.4290	TRR1	12	63	8.20426
orf19.4294		1	8	3.85614
orf19.4295		8	46	11.9738
orf19.4299	MSW1	4	15	4.41395
orf19.4304	GAP1	27	96	2.10344
orf19.4309	GRP2	60	414	8.32128
orf19.4310		1	5	27.3568
orf19.4312		19	31	6.1858
orf19.4315		21	47	3.14626
orf19.4318	MIG1	26	44	3.98622
orf19.4322	DAP2	37	79	3.21136
orf19.4325		11	20	2.45077
orf19.4326		3	60	22.3511
orf19.4328	CCC2	18	137	11.4957
orf19.4330		2	14	5.66537
orf19.4335	TNA1	9	355	29.1714
orf19.4337		3	124	14.0058
orf19.4341		1	13	22.1182
orf19.4342		2	6	5.23853
orf19.4348	MED14	19	55	5.01077
orf19.4349		24	57	4.4326
orf19.4354	MCM2	9	31	3.99126
orf19.4355		2	14	8.14882
orf19.4357		5	16	3.0766
orf19.4363	SGD1	8	89	14.6346
orf19.4365		2	38	15.1335
orf19.4366		1	14	6.51906
orf19.4367	SMC1	21	41	2.29186
orf19.4368		16	39	2.35595
orf19.4369		21	46	2.74214
orf19.437	GRS1	41	320	8.02513
orf19.4370		5	12	2.09541
orf19.4374	PRP42	1	13	7.37274
orf19.4375.1	RPS3	1	4	7.20298
orf19.4377	KRE1	6	30	3.59358
orf19.4381	VTC3	62	111	2.83683
orf19.4388		3	19	2.48698
orf19.4390		4	8	3.37594
orf19.4394		2	7	2.32823
orf19.440	SDH1	3	19	2.4636
orf19.4404	PGA49	8	34	5.75211
orf19.4405	PPS1	10	27	4.10865
orf19.4409		2	13	2.57769
orf19.4412		16	57	2.7062
orf19.4426	PEX3	1	16	2.85209
orf19.4433	CPH1	6	19	7.31731
orf19.4435		16	73	9.55379
orf19.4437		15	28	4.7427
orf19.4441		2	7	3.49235
orf19.4444	PHO15	2	18	5.40972
orf19.4445		28	135	4.79144
orf19.4446		9	28	3.98251
orf19.4448	SOG2	17	52	6.73525
orf19.4449		22	32	4.1611
orf19.445		2	37	12.4173
orf19.4450	ZCF23	12	56	5.82059
orf19.4451	RIA1	37	340	2.26423
orf19.4455		2	44	39.58
orf19.4456	GAP4	116	233	3.01263
orf19.4457	BNI4	29	137	5.98689
orf19.4459		2	27	25.0285
orf19.4463		0	6	80.3241
orf19.4465		2	22	13.5461
orf19.4468		0	5	5.90682
orf19.4471		22	248	12.6917
orf19.4475	KTR4	2	9	7.76078
orf19.4476		26	228	10.8045
orf19.4477	CSH1	36	361	11.9057
orf19.4478		14	24	2.41139
orf19.4479		2	88	24.9639
orf19.448	CUE5	35	52	2.40471
orf19.4481	MFALPHA	1	8	5.62657
orf19.449		276	25	-2.09601
orf19.4490	RPL17B	102	252	20.1021
orf19.4490.2	QCR8	1	40	12.8386
orf19.4492		0	11	25.0285
orf19.4494	KTR2	7	26	11.1934
orf19.4495	NDH51	181	645	5.46679
orf19.450		1	4	2.91029
orf19.4502		71	136	3.20842
orf19.4506	LYS22	16	1807	101.543
orf19.4510	IFA4	6	40	7.48361
orf19.4513		13	95	11.1204
orf19.4516		3	16	11.2046
orf19.4518		5	38	5.95754
orf19.4519	SUV3	4	81	32.8281
orf19.4526	HSP3	24	9	-2.08619
orf19.4530.1		16	3	-4.11102
orf19.4531		53	133	3.2677
orf19.4532		8	62	9.22979
orf19.4535	PTR3	2	16	6.79845
orf19.4536	CYS4	0	7	15.3173
orf19.454	SFL1	21	63	4.7427
orf19.4549	FGR38	3	10	2.97497
orf19.4550		5	92	29.491
orf19.4551	CTN1	266	504	2.48576
orf19.4553		32	120	3.86701
orf19.4557		12	22	2.57331
orf19.4560	BFR1	38	441	8.98875
orf19.4565	BGL2	3	15	4.86942
orf19.4568	ZCF25	4	29	14.9007
orf19.4571		2	10	2.13422
orf19.4575		21	45	3.24065
orf19.4577		4	21	4.46245
orf19.4589		1	8	5.70418
orf19.4590	RFX2	27	37	2.55538
orf19.4592	HSX11	9	22	2.66084
orf19.4595		1	5	2.56106
orf19.4599	PHO89	26	543	13.4588
orf19.4602	MDH1-1	140	372	4.07441
orf19.4615		1	4	18.1602
orf19.4621		14	59	5.74548
orf19.4627		12	44	4.00593
orf19.4629		7	80	7.42125
orf19.4630	CPA1	0	19	21.5362
orf19.4633		5	18	4.12638
orf19.4635	NIP1	18	110	11.8352
orf19.4640	PWP1	1	43	22.6697
orf19.4642		1	9	5.69805
orf19.4643		34	141	8.94042
orf19.4645	BEM1	17	38	3.87334
orf19.4647	HAP3	9	123	14.6346
orf19.4649	ZCF27	10	83	8.32344
orf19.4650	ILV6	19	400	16.3329
orf19.4651	PGA53	2	161	32.2072
orf19.4653		0	270	57.9608
orf19.4654		0	18	8.14882
orf19.4655	OPT6	7	71	12.9023
orf19.4656		1	7	14.5515
orf19.4658		32	122	5.17085
orf19.4660	RPS6A	2	76	10.058
orf19.4662	RLM1	15	45	4.68293
orf19.4670	CAS5	7	38	6.9847
orf19.4673	BMT9	17	24	4.04017
orf19.4674.1	CRD2	0	10	13.2418
orf19.4675	ASK1	0	6	7.48361
orf19.4679	AGP2	259	84	-2.00164
orf19.4681	RAT1	25	147	8.00331
orf19.4682	HGT17	202	23	-3.23631
orf19.4683	MLP1	196	220	2.00763
orf19.4686		54	343	6.79593
orf19.4688	DAG7	15	152	9.31294
orf19.4689	PGA57	2	10	2.28809
orf19.469	HST7	12	34	2.69585
orf19.4697	MDN1	261	1385	6.22355
orf19.4698	PTC8	4	81	18.2378
orf19.4699		7	22	2.59281
orf19.4703		1	13	7.916
orf19.4704	ARO1	112	935	8.68663
orf19.4707		2	10	4.26843
orf19.4711		24	30	2.29186
orf19.4713		12	19	3.27062
orf19.4716	GDH3	238	726	3.77399
orf19.4718	TRP5	21	499	17.5737
orf19.4719	CWH41	13	58	4.41562
orf19.4728		67	96	3.69579
orf19.473	TPO4	6	71	17.1292
orf19.4736		57	80	2.21466
orf19.4737	TPO3	21	7	-2.03041
orf19.4739	MSS116	2	93	26.8717
orf19.4743	AFG1	3	11	2.83754
orf19.4744		5	11	2.25548
orf19.4746	JIP5	7	41	6.80561
orf19.4747	HEM14	1	5	3.72518
orf19.475		2	8	5.43255
orf19.4750		4	18	8.73088
orf19.4755	KEX2	54	183	4.20634
orf19.4756		16	24	2.23123
orf19.4757	NAR1	6	67	10.1347
orf19.4758		5	13	3.47471
orf19.4760		4	43	7.86943
orf19.4761	HST1	6	32	8.74966
orf19.4763		1	7	9.64554
orf19.4764		48	79	2.09894
orf19.4765	PGA6	13	49	6.47857
orf19.4766	ARG81	19	111	6.92927
orf19.4768		5	27	7.56676
orf19.477		1	6	10.8651
orf19.4771		8	81	11.6412
orf19.4772	SSU81	24	33	2.0669
orf19.4775	CTA8	15	77	5.33043
orf19.4779		12	50	4.65647
orf19.478		0	13	20.7213
orf19.4784	CRP1	29	79	3.34684
orf19.4785	PTC1	2	9	3.25953
orf19.4786	FGR43	11	2	-2.57706
orf19.4787		9	17	3.13416
orf19.4788	ARG5,6	12	290	33.5411
orf19.4789		0	11	41.9082
orf19.4792		13	85	7.50856
orf19.4798		53	81	3.34883
orf19.4799	CEF1	8	38	5.48798
orf19.48	RPM2	107	178	2.67218
orf19.4802	FTH1	3	8	2.64572
orf19.4805		11	196	15.9096
orf19.4808	NUP188	39	115	6.47923
orf19.481	GCD1	5	11	2.63574
orf19.4813	GUA1	13	94	14.1839
orf19.4816		5	43	6.27611
orf19.4818		4	9	5.09301
orf19.4820		1	16	66.3547
orf19.4821	LIP1	2	6	4.65647
orf19.4823	LIP6	4	15	3.05581
orf19.4825		1	9	2.16193
orf19.4827	ADE12	70	263	4.82277
orf19.4831	MTS1	64	147	2.78732
orf19.4833	MLS1	258	1456	7.84343
orf19.4835		1	8	6.65875
orf19.4843		12	43	3.67616
orf19.4848	SKI3	63	97	2.1324
orf19.4849		1	11	4.65647
orf19.4851	TFA1	13	21	2.49454
orf19.4858	VPS41	24	39	2.23869
orf19.4863	PDC2	11	83	6.20863
orf19.4865		12	45	5.40972
orf19.4866	CPP1	9	22	2.41447
orf19.4869	SFU1	6	25	3.63787
orf19.4870	DBP3	4	106	29.7681
orf19.4871	ERO1	20	117	9.20711
orf19.4874	MNN23	7	88	11.8528
orf19.4880		0	11	20.0228
orf19.4882		1	7	2.57912
orf19.4884	WOR1	2	14	10.089
orf19.4885	MIR1	55	425	9.03355
orf19.4887	ECM21	104	21	-4.49963
orf19.4889		4	37	7.89937
orf19.4890	CLA4	18	123	11.5539
orf19.4892	TPK1	14	55	4.65647
orf19.4904		2	6	6.51906
orf19.4909	CBK1	12	74	7.2434
orf19.4909.1	RPL42	22	36	2.65022
orf19.4910	FGR41	19	62	3.82933
orf19.4912		1	12	5.58776
orf19.4914.1		182	5	-9.01971
orf19.4916		6	0	-2.68444
orf19.4924		15	65	3.41725
orf19.4927	BNI1	71	141	2.93133
orf19.4929		2	42	5.91497
orf19.4931.1	RPL14	2	6	2.14914
orf19.4932		5	100	21.0996
orf19.4933	FAD3	4	66	15.4917
orf19.4934	OP4	2	88	34.0504
orf19.4937	CHS3	66	481	8.5143
orf19.4939	MON2	51	140	3.01943
orf19.494		5	47	6.8184
orf19.4940		19	63	4.08934
orf19.4941	TYE7	46	12	-2.07046
orf19.4943	PSA2	39	7	-6.60089
orf19.4948	REX3	2	37	3.71186
orf19.4950	AKR1	22	35	-2.06148
orf19.4951		21	99	5.3379
orf19.4954		2	5	10.9248
orf19.4955		2	5	6.15319
orf19.4956	RPN1	115	166	2.1365
orf19.4962	RMP1	4	28	17.4618
orf19.4965		2	10	9.57163
orf19.4966	AGC1	13	256	16.4701
orf19.4969	KEM1	119	263	2.51859
orf19.4972		1	8	19.79
orf19.4975	HYR1	17	42	3.43108
orf19.4979	KNS1	39	14	2.06954
orf19.4980	HSP7	891	1979	2.99309
orf19.4982		0	7	10.7196
orf19.4984		10	27	4.86813
orf19.4985	GUP1	2	5	2.42136
orf19.4988		0	10	5.48798
orf19.4991	MPT5	22	66	4.71617
orf19.4993	SEC18	54	252	5.25793
orf19.4997	KIS2	37	57	3.75844
orf19.4998	ROB1	281	829	3.34495
orf19.50		11	52	4.00456
orf19.500		0	8	95.4576
orf19.5000	CYB2	431	111	-3.22656
orf19.5001	CUP2	3	21	3.63787
orf19.5004	RAD54	1	15	6.07928
orf19.5005	OSM2	186	25	-4.30208
orf19.5006.1		2	7	2.52225
orf19.5009		0	31	53.9374
orf19.501		2	29	20.9541
orf19.5011	KAR9	1	23	18.0438
orf19.5015	MYO2	89	271	4.40922
orf19.5019		42	261	8.03241
orf19.5021	PDX1	34	45	3.23928
orf19.5022		9	25	3.83474
orf19.5025	MET3	8	181	29.4706
orf19.5027	LCB2	13	77	8.41339
orf19.5029	MODF	0	16	48.8929
orf19.5031	SSK1	9	40	4.89732
orf19.5032	SIM1	22	100	8.6599
orf19.5034	YBP1	10	31	4.46245
orf19.5035	HPC2	11	18	2.41139
orf19.5037	HRQ2	2	12	14.5515
orf19.5038		9	152	10.186
orf19.5040		21	38	2.7391
orf19.5043		2	9	4.65647
orf19.5046	RAM1	17	55	4.39778
orf19.505	SRV2	9	19	5.07223
orf19.5050	MTO1	0	7	6.15319
orf19.5052		12	3	-4.21701
orf19.5056		131	2	-7.22213
orf19.5059	GCS1	16	332	17.2955
orf19.506	YDJ1	6	36	12.8682
orf19.5061	ADE5,7	47	447	11.0815
orf19.5064	MRPL3	2	17	7.47363
orf19.5070		78	91	3.45811
orf19.5071	NRP1	5	49	9.50696
orf19.5079	CDR4	391	48	-5.54784
orf19.508	QDR1	4	13	4.42365
orf19.5081	FUN12	71	384	5.87516
orf19.5085		29	172	6.78656
orf19.5092		1	4	4.15756
orf19.5094	BUL1	18	232	10.6263
orf19.5097	CAT8	8	118	18.5095
orf19.51		46	459	11.3337
orf19.5100	MLT1	46	1535	29.4271
orf19.5102	PLB5	24	85	3.25953
orf19.5105	MED15	28	47	4.28885
orf19.5106	DIP2	16	260	18.0438
orf19.5110	OPY2	26	93	4.3936
orf19.5117	OLE1	1716	731	-2.00258
orf19.5118	SDS24	317	100	-2.18255
orf19.512		37	191	6.71476
orf19.5121	OPT5	1	14	15.1335
orf19.5124	RBR3	14	46	2.63192
orf19.5125		143	17	-3.33132
orf19.5126		4	67	22.8167
orf19.5129		15	29	2.1065
orf19.5131		38	56	2.06299
orf19.5133	ZCF29	87	181	2.35734
orf19.5136		9	24	6.51906
orf19.5140		0	13	23.2823
orf19.5141		5	11	3.49235
orf19.5145	SSP96	0	7	8.73088
orf19.5147	LMO1	20	132	5.18396
orf19.5148	CYR1	100	200	2.64056
orf19.5160		28	109	3.97076
orf19.5161		1	4	2.61926
orf19.5162	BCK1	11	50	7.07425
orf19.5167	IFM1	3	48	9.91656
orf19.5169		4	14	6.25713
orf19.5175		53	139	3.92551
orf19.5177		25	67	3.05581
orf19.5178	ERG5	94	158	2.24592
orf19.518		17	56	4.45639
orf19.5181	NIK1	63	125	2.65462
orf19.5188	CHS1	69	96	2.18385
orf19.5190		2	6	5.82059
orf19.5198	NOP4	6	70	10.3908
orf19.52		5	39	9.92272
orf19.5201		1	4	2.28039
orf19.5203		6	29	5.04451
orf19.5209		3	12	5.98689
orf19.5210		1	6	4.26843
orf19.5211	IDP1	0	7	34.4246
orf19.5212		1	25	33.9922
orf19.5213		15	38	2.78683
orf19.5221		37	76	3.44061
orf19.5229		15	146	4.11599
orf19.5232	CSI2	3	64	10.8651
orf19.5234	RBD1	16	47	6.16551
orf19.5238		24	50	2.50395
orf19.5241	SNT1	61	82	2.40945
orf19.5242	CDC6	2	5	12.2232
orf19.5243	TRP3	5	38	34.7295
orf19.5244	MCD4	5	31	9.31294
orf19.5245	BUL4	5	10	3.10431
orf19.5251	ZCF3	11	30	3.09323
orf19.5253		8	13	2.91029
orf19.5255	PXA2	24	42	2.85538
orf19.5257	LCB4	1	5	4.36544
orf19.5258		1	17	6.59667
orf19.5263	SER33	10	20	12.4646
orf19.5270		2	6	2.97497
orf19.5271		2	16	11.6412
orf19.5274		69	113	2.6579
orf19.5280	MUP1	14	239	18.4319
orf19.5281		145	316	2.42044
orf19.5282		149	54	-2.61053
orf19.5288	IFE2	153	6	-5.24616
orf19.5289		3	17	5.937
orf19.529		5	28	7.13022
orf19.5291		3	29	8.34284
orf19.5292	AXL2	12	249	19.887
orf19.5293		20	100	5.17772
orf19.5294	PDB1	31	140	4.024
orf19.5297		17	39	4.03561
orf19.5300		10	29	11.4893
orf19.5302	PGA31	31	43	2.19889
orf19.5303	PGA3	1	7	7.37274
orf19.5307	JEN2	102	170	2.38986
orf19.5311		2	12	7.76078
orf19.5312	MET4	7	53	10.8651
orf19.5318	RAD1	12	37	3.49235
orf19.532	RBR2	7	19	5.75709
orf19.5321		8	18	3.13107
orf19.5335	SGS1	13	22	2.91029
orf19.5340		1	8	5.94993
orf19.5348	TPS3	136	33	-2.62324
orf19.5356		3	42	10.6825
orf19.5358		0	8	11.6412
orf19.536		17	58	6.45115
orf19.5365		11	70	8.26523
orf19.5376		12	31	3.08491
orf19.5377	HOS2	0	6	38.8039
orf19.538		1	4	7.916
orf19.5380	LYS144	5	14	2.50733
orf19.5383	PMA1	1327	7320	6.43029
orf19.5384	CHS8	184	483	2.96927
orf19.5387	VPS8	23	52	3.0612
orf19.5388	SWD1	9	18	2.1228
orf19.5391		5	46	11.0143
orf19.5392	NGT1	1	10	4.44481
orf19.5393		13	103	3.83586
orf19.54	RHD1	4	17	2.69585
orf19.5404		0	17	16.6857
orf19.5407	SOF1	14	77	7.71994
orf19.541		2	35	16.2081
orf19.542	HXK2	406	43	-4.39585
orf19.5425		0	8	12.8053
orf19.5431		0	5	6.66722
orf19.5436	UTP8	0	11	9.38142
orf19.5437	RHR2	33	184	5.29776
orf19.5438		1	9	6.28623
orf19.5447	HGT19	83	5	-6.29948
orf19.5469		6	1	-4.6648
orf19.5479	FGR12	1	11	6.9847
orf19.5480	ILV1	15	81	13.7286
orf19.5483		1	16	26.9117
orf19.5486		29	48	2.75622
orf19.5487	CDC46	6	12	5.15538
orf19.5493	GSP1	7	36	2.99518
orf19.5495		17	98	6.13807
orf19.5496	AVT1	4	12	2.97497
orf19.5498	EFH1	7	14	4.78582
orf19.5499		0	5	10.4771
orf19.550	PDX3	1	4	3.99849
orf19.5500	MAK16	0	25	32.3625
orf19.5504		15	107	16.9741
orf19.5505	HIS7	10	330	31.1903
orf19.5506	PLC1	15	32	2.81328
orf19.5507	ENP1	4	65	14.2381
orf19.5508		0	8	14.5515
orf19.551		8	31	7.34849
orf19.5510		5	163	19.927
orf19.5515		0	6	16.5663
orf19.5516		12	55	5.56752
orf19.5517		2	36	23.7813
orf19.5519	GCV1	14	64	4.65647
orf19.5525		12	1	-29.6975
orf19.5535		6	12	4.32386
orf19.5537	WSC2	16	21	2.77171
orf19.554	DIT2	2	6	8.9249
orf19.5541		12	95	10.2031
orf19.5548	LYS14	0	25	21.5362
orf19.5552		12	20	3.6217
orf19.5555		8	38	5.23853
orf19.5557	MNN4-4	7	15	3.88039
orf19.5558	RBF1	7	13	3.56511
orf19.556		20	55	3.70023
orf19.5561	STE23	26	66	4.58592
orf19.5563	RNH1	6	37	12.1586
orf19.5565		26	10	2.29913
orf19.5566		1	14	18.6259
orf19.5575		8	15	5.82059
orf19.5578		2	10	6.40265
orf19.558	GUT1	2	40	13.2488
orf19.5580	TEL1	66	144	2.65419
orf19.5584	PEP3	7	15	2.06954
orf19.5585	SAP5	1	10	9.70098
orf19.5586		9	23	3.20132
orf19.5588	PGA6	3	23	12.3396
orf19.5591	ADO1	17	23	3.3145
orf19.5592		4	13	8.84729
orf19.5595	SHE3	8	69	10.1278
orf19.5597	POL5	11	38	4.03561
orf19.5599	MDL2	8	60	6.9459
orf19.56	ARG2	2	11	8.58537
orf19.5602	BMT6	7	23	2.32823
orf19.5604	MDR1	5	763	154.44
orf19.5605		21	143	8.1936
orf19.5607		0	6	24.4465
orf19.5612	BMT4	8	67	7.72974
orf19.5619		2	29	22.1182
orf19.5620		10	41	6.68429
orf19.5621		18	37	4.43116
orf19.5623	ARP4	2	23	66.7427
orf19.5625		0	7	5.82059
orf19.5627		20	46	6.40265
orf19.5628		1	13	9.83032
orf19.5636	RBT5	103	17	-4.80415
orf19.5639	HIS4	48	1046	16.7835
orf19.5640	PEX5	28	11	-2.67523
orf19.5641	CAR2	0	8	7.32267
orf19.5644		0	9	30.2223
orf19.5645	MET15	1	7	18.6601
orf19.5657	SWI1	26	43	2.56909
orf19.5663	RCH1	0	58	28.2563
orf19.5667	MNR2	11	40	3.03806
orf19.5673	OPT7	6	11	2.42524
orf19.5675		38	134	4.87611
orf19.5676		23	60	3.89148
orf19.5677	DUR4	2	15	11.6412
orf19.568	SPE2	1	29	146.679
orf19.5680		8	28	2.91029
orf19.5682		14	28	2.21558
orf19.5685	THS1	16	63	3.53502
orf19.570	IFF8	3	11	4.9475
orf19.5701		2	13	7.30219
orf19.5702		47	141	3.5966
orf19.5704		2	34	13.4705
orf19.5705	NAM2	11	33	3.58548
orf19.5710		59	133	2.12519
orf19.5711		27	102	3.76099
orf19.5713	YMX6	18	356	23.7972
orf19.5714	SAP1	24	158	8.36197
orf19.5720		0	8	20.9541
orf19.5722		9	47	11.3138
orf19.5723	POX1	18	54	2.50285
orf19.5730		1	5	6.40265
orf19.5736	ALS5	17	67	6.92344
orf19.5742	ALS9	23	66	3.67861
orf19.5746	ALA1	73	504	7.89288
orf19.5750	SHM2	108	329	4.92908
orf19.5752		13	28	3.59818
orf19.5753	HGT1	165	575	4.82673
orf19.5754		7	83	13.5038
orf19.5755		0	8	67.5188
orf19.5759	SNQ2	68	751	12.348
orf19.5760	IHD1	178	1559	11.4612
orf19.5765	NUP82	9	29	2.19242
orf19.577		9	16	3.06904
orf19.5770	OPT8	14	28	2.07452
orf19.5771	PBP2	7	32	4.96282
orf19.5772		2	49	10.7357
orf19.5780		8	32	3.41959
orf19.5782		31	71	3.10431
orf19.5784	AMO1	0	26	6.20863
orf19.5785		3	27	10.2442
orf19.5789	ADE8	3	8	2.48345
orf19.5791	IDH2	20	55	8.75192
orf19.58	RRP6	4	46	9.85619
orf19.5801	RNR21	14	41	10.9533
orf19.5804	HYU1	54	77	2.57633
orf19.5805	DLD1	110	40	-2.05418
orf19.5806	ALD5	1645	3144	2.24942
orf19.581		70	110	2.21076
orf19.5811	MET1	0	13	59.952
orf19.5812		24	72	3.49235
orf19.5816	EBP7	2	15	17.4618
orf19.5818	SUR2	10	36	7.85779
orf19.5821		21	26	2.42689
orf19.5824		6	10	2.94093
orf19.5830	LHS1	25	86	2.69345
orf19.5832	HPT1	2	8	3.35266
orf19.5834		33	81	3.86575
orf19.5840		0	5	5.94993
orf19.5843	SRR1	5	10	2.32823
orf19.5845	RNR3	5	37	10.283
orf19.5847		24	139	5.90577
orf19.585		2	7	6.35787
orf19.5850	NOC2	4	46	16.6614
orf19.5851	STE13	5	12	7.13022
orf19.5852		13	32	2.99344
orf19.5855	MBP1	7	24	3.68011
orf19.5856		1	8	3.65865
orf19.586	ERV46	0	6	8.14882
orf19.5864	URK1	2	12	5.04451
orf19.5865		9	43	6.05341
orf19.5866		1	6	29.1029
orf19.5870	CTP1	2	5	7.48361
orf19.5871	SNF5	0	7	3.9289
orf19.5877	ATF1	7	133	26.3589
orf19.5884		7	53	4.90155
orf19.5887	NUP85	0	49	13.3531
orf19.5893	RIP1	2	34	9.02191
orf19.5894		1	13	5.75932
orf19.5904	RPL19A	6	28	12.9127
orf19.5906	ADE2	20	47	3.28341
orf19.5908	TEC1	194	715	4.85509
orf19.5910		14	66	3.88039
orf19.5912	MAK21	12	322	17.3086
orf19.5917.3		54	73	2.74104
orf19.5919	MEA1	3	15	8.14882
orf19.5921		25	59	2.65564
orf19.5924	ZCF31	12	37	4.6117
orf19.593	FGR32	4	17	3.52763
orf19.5932		11	24	2.63004
orf19.5934		5	21	6.8184
orf19.5935		4	10	2.76478
orf19.5938	SEN1	64	166	2.77597
orf19.5953		16	38	3.45221
orf19.5958	CDR2	44	86	2.59567
orf19.5959	NOP14	4	120	30.3835
orf19.5960	NCE12	796	170	-2.94608
orf19.5964	ARF2	79	136	2.79388
orf19.5965		31	96	3.72518
orf19.5967	FGR44	2	9	11.3725
orf19.597		44	100	4.26843
orf19.5973	PHB2	2	7	2.32823
orf19.5987		2	7	5.23853
orf19.5989		8	1	-5.49773
orf19.5991		14	191	15.9842
orf19.5996.1	RPS19A	0	6	36.0876
orf19.600	TRK1	18	54	4.5429
orf19.6000	CDR1	680	1902	3.37752
orf19.6001	SAP3	2	7	2.63312
orf19.6002	RPL8B	2	30	14.254
orf19.6007		14	39	3.67145
orf19.6008		28	59	2.87796
orf19.6009	SET1	27	81	4.13074
orf19.6011	SIN3	83	145	2.16193
orf19.6012		24	64	3.83844
orf19.6016		2	16	13.1933
orf19.6018	LRO1	29	148	5.07979
orf19.6020		1	12	16.2976
orf19.6022	NRM1	3	29	14.2604
orf19.6023		6	22	5.82059
orf19.6024		1	7	18.6259
orf19.6025		0	8	27.9388
orf19.6026	ERG2	3	9	4.11502
orf19.6027		4	22	5.52956
orf19.6028	HGC1	18	189	8.98347
orf19.6029	ROT1	6	26	8.02628
orf19.6032	SPE1	18	45	4.53604
orf19.6033	CMP1	16	48	5.74628
orf19.6034	TUB2	44	221	4.75001
orf19.6037	ASM3	7	42	7.21753
orf19.6038	UGA32	13	20	2.26697
orf19.604		1	12	12.4173
orf19.6041	RPO41	37	206	5.59083
orf19.6046	APC1	24	30	4.91366
orf19.6049		15	21	2.47375
orf19.6053	CIS2	10	33	3.38652
orf19.6054		18	47	3.29833
orf19.6055		4	21	5.5031
orf19.606		50	53	2.17556
orf19.6060	GCN2	12	28	3.91735
orf19.6068	SVF1	6	44	7.11405
orf19.6070	ENA2	833	326	-2.03389
orf19.6073	HMX1	1	6	5.31445
orf19.6078.1	RFC52	5	0	-11.7597
orf19.6082		7	18	2.353
orf19.6086	LEU4	3	57	7.72551
orf19.6090		21	82	8.43985
orf19.6091	RIM8	3	42	21.6526
orf19.610	EFG1	21	66	3.7195
orf19.6109	TUP1	0	7	2.16406
orf19.6112	CTA2	0	7	4.40702
orf19.6116	GLK4	14	0	-8.95835
orf19.6117		3	17	3.81831
orf19.6126	KGD2	129	289	2.74228
orf19.6133	PIF1	7	28	6.20863
orf19.6134		21	35	2.32823
orf19.6137		2	26	15.9096
orf19.6138		7	17	2.71627
orf19.6141	HGT16	17	55	4.4326
orf19.6146	CLG1	10	65	2.90548
orf19.6155		8	15	3.08149
orf19.6160		577	138	-2.88662
orf19.6165	KGD1	290	770	2.8488
orf19.6168		27	46	2.14634
orf19.6169	ATO1	185	327	2.29068
orf19.6192		1	12	11.0591
orf19.6193	TAF145	49	129	3.12857
orf19.6195		13	30	2.7284
orf19.6198.1		3	16	3.49235
orf19.6199		3	40	5.4782
orf19.6200		1	8	7.56676
orf19.6202	RBT4	47	155	4.18293
orf19.6203	PUT3	8	67	12.0569
orf19.6208	MEF2	11	59	6.65875
orf19.6211		1	5	2.4495
orf19.6214	ATC1	87	32	-2.09983
orf19.6220		9	64	4.19624
orf19.6222	SPO22	6	15	3.74542
orf19.6227		0	7	2.23869
orf19.6229	CAT1	1394	289	-3.5159
orf19.6230		3	35	9.70098
orf19.6233		4	34	5.14662
orf19.6236	NOP6	0	5	58.2059
orf19.6237	RAC1	9	96	7.27573
orf19.6242	CYK3	47	10	-2.69637
orf19.6243	VPS34	4	49	15.1335
orf19.6244		17	28	2.45758
orf19.6245		56	443	7.79774
orf19.6247		10	15	3.98053
orf19.6249	HAK1	1	18	6.2439
orf19.6250		13	4	-2.51343
orf19.6252		6	40	4.72923
orf19.6253	RPS23A	19	216	6.07252
orf19.6257	GLT1	816	1542	2.56724
orf19.6259		2	9	2.91029
orf19.6260		57	180	3.93886
orf19.6266		1	66	7.23869
orf19.6268		7	28	5.87602
orf19.6269		7	18	3.03964
orf19.6271		15	67	3.75978
orf19.6274	PBR1	2	11	5.3032
orf19.6275		3	15	6.79068
orf19.6276		49	101	5.19594
orf19.6277		27	155	6.86531
orf19.6282		4	33	8.66621
orf19.6284		3	9	3.75104
orf19.6287	AAT21	20	35	2.12335
orf19.6291		5	29	4.07441
orf19.6294	MYO1	27	259	10.9427
orf19.6295	MAS2	0	8	5.35494
orf19.6296	VPS22	1	6	16.2976
orf19.6298	SPB4	2	9	20.9541
orf19.6304	LYS5	0	52	62.8623
orf19.6306		12	68	7.71644
orf19.6309	MSS11	10	31	6.57979
orf19.6310		29	87	6.00319
orf19.6312	RPS3	75	524	5.61444
orf19.6313	MNT4	3	22	3.94009
orf19.6316		3	11	3.5819
orf19.6317	ADE6	44	232	7.58293
orf19.6336	PGA25	10	20	2.76062
orf19.6338		9	1	-5.58363
orf19.634		2	7	2.14914
orf19.6340		2	22	26.6404
orf19.6343	FEN1	3	19	9.24827
orf19.6345	RPG1A	29	89	7.23305
orf19.6347		0	5	7.85779
orf19.6348		20	50	3.9289
orf19.6349	RVS162	15	20	9.5975
orf19.635		1	5	3.49235
orf19.6350		1	4	15.1335
orf19.6351		4	8	2.22241
orf19.6353		6	24	7.37274
orf19.6356		1	36	21.1204
orf19.6362	SPA2	67	135	2.31611
orf19.6367	SSB1	135	409	3.49025
orf19.6369	RIO2	1	13	9.31294
orf19.637	SDH2	86	205	2.80338
orf19.6371		1	4	22.1182
orf19.6382		58	146	2.70784
orf19.6385	ACO1	377	1435	4.81432
orf19.6398		2	5	5.69124
orf19.6402	CYS3	23	449	25.637
orf19.6404	GSH2	1	5	4.65647
orf19.6407		2	8	4.07441
orf19.6414.3	TPM2	58	164	4.16001
orf19.6415.1		13	54	2.63406
orf19.6416		14	50	3.05581
orf19.6417	TSR1	14	219	20.1134
orf19.6418		2	21	9.02191
orf19.642		19	36	2.32823
orf19.6422	SSY5	10	40	3.1842
orf19.6425	SKI2	37	109	2.32823
orf19.643		9	51	6.9847
orf19.6431		0	9	16.2976
orf19.6434	PEX19	0	5	2.61926
orf19.644	HGT9	5	11	2.25063
orf19.6442	PRP8	126	318	2.59688
orf19.6453		9	41	3.55887
orf19.6456		3	19	5.82059
orf19.6457		12	24	4.7496
[truncated: 539 more rows]

## Sheet: C. a. 3h - C. a. + PK 3h
ORF name	Gene Symbol	Read Count		Fold Change of expression
		3ca	3PKca
Ca19-mtDNA:5525-9928		1	35	8.13973
CaalfMr17	RRNS	40203	23730	-2.09975
CEN1		1	14	31.6581
CEN2		2	9	5.71604
CEN3		0	6	14.51
CEN4		3	9	5.27635
CEN6		2	13	12.5313
CEN7		2	19	17.8077
CENR		4	17	4.83665
chi-6a		0	5	3.29772
koppa-1a		0	5	18.4672
koppa-3a		7	15	2.41833
mu-Ra		0	7	8.79391
nu-2a		0	55	36.8145
orf19.10	ALK8	10	21	3.41411
orf19.1005		6	13	3.95726
orf19.1007	KCS1	2	11	6.78983
orf19.1011	MNN21	11	64	15.1121
orf19.102		2	6	2.98993
orf19.1027	PDR16	7	15	2.38862
orf19.1028	ELA1	3	10	2.21607
orf19.1030		118	259	2.40978
orf19.1031	HMG1	85	89	2.01686
orf19.1033	STR2	83	136	2.96415
orf19.1042	POR1	35	37	2.32564
orf19.1045		3	22	3.17294
orf19.1047	ERB1	72	184	6.97739
orf19.1052		1	6	8.2914
orf19.1055	CDC3	99	151	2.73517
orf19.1065	SSA2	316	1158	4.1979
orf19.1069	RPN4	134	184	3.10673
orf19.1075		11	43	6.93954
orf19.1077	ATM1	63	115	3.43196
orf19.1078	HBR2	103	251	8.73895
orf19.1080		3	20	5.37782
orf19.1083		1	22	2.31977
orf19.1085		29	72	14.5372
orf19.109		1	8	15.3893
orf19.1090		1	4	2.11054
orf19.1105.2	PGA56	45	66	2.2938
orf19.1106		7	15	2.56875
orf19.1108	HAM1	0	6	4.68276
orf19.1113		0	10	2.55823
orf19.1116		6	12	3.07787
orf19.1121		4	32	4.6168
orf19.113	CIP1	43	50	3.0339
orf19.1133	MSB1	60	102	2.42591
orf19.1144		34	52	2.63817
orf19.1149	MRF1	4	12	3.41763
orf19.1154	EGD1	52	212	2.83121
orf19.1170	ARO7	2	19	4.74871
orf19.1171	BTA1	6	20	3.07787
orf19.1195		99	184	2.62629
orf19.1196	PKH3	32	43	2.5884
orf19.122	CDC2	25	46	3.11529
orf19.1220	RVS167	4	11	4.17711
orf19.1223	DBF2	28	145	6.79718
orf19.1227	ZCF4	3	9	6.26566
orf19.1228	HAP2	11	26	4.29645
orf19.1232	VRG4	78	125	3.31865
orf19.1233	ADE4	181	461	3.49962
orf19.1235	HOM3	44	134	3.80415
orf19.1237	ARO9	2	12	10.9296
orf19.1239		9	35	3.10373
orf19.1251	BRN1	5	24	2.49479
orf19.1261	CGT1	6	10	3.48616
orf19.1264	CFL2	56	510	10.9586
orf19.1265		37	58	2.21719
orf19.1270	FRE3	0	9	10.5527
orf19.1272		23	45	2.09641
orf19.1274		0	8	18.9069
orf19.1286		4	29	9.98737
orf19.1287		37	180	6.63541
orf19.1295	VAS1	334	1241	4.89223
orf19.1296		2	8	6.89984
orf19.1297		9	14	2.08855
orf19.1299	RPN6	1	4	7.71158
orf19.1300		2	20	6.09884
orf19.1303		4	18	7.47483
orf19.1304		1	11	9.33508
orf19.1306		0	6	6.95518
orf19.1318		1	12	21.1054
orf19.1323		42	81	2.2045
orf19.1325	ECM38	88	116	2.37436
orf19.1326		15	26	2.33588
orf19.1327	RBT1	51	262	6.1197
orf19.1342	SHM1	12	31	2.09502
orf19.1357	FCY21	84	188	4.56607
orf19.1358	GCN4	593	1323	3.31776
orf19.1359		29	44	5.27635
orf19.136		35	77	3.22443
orf19.1362	SMM1	21	39	2.656
orf19.1363		119	211	2.98771
orf19.1364		11	20	3.13852
orf19.1365		2	12	9.23361
orf19.1367.1		1	6	2.29105
orf19.1369		20	30	2.07285
orf19.1373	INP51	13	40	4.03054
orf19.1375	LEU42	186	622	4.22665
orf19.1381		4	10	5.47928
orf19.139	TRA1	436	408	2.85407
orf19.1390	PMI1	7	15	4.42282
orf19.1394		52	142	4.08701
orf19.1401	EAP1	317	2363	6.58734
orf19.1409	VAC7	18	42	2.79904
orf19.1414		11	22	2.00219
orf19.1415	FRE1	20	113	4.54858
orf19.1416	COX11	7	14	5.23086
orf19.1430		0	17	13.7185
orf19.1435	TEF1	126	255	3.42289
orf19.144	SNU114	53	97	2.96561
orf19.1441		108	145	2.50771
orf19.1445	ESC4	5	11	4.39696
orf19.1447		6	11	2.08501
orf19.1468	CDC55	35	1498	12.7112
orf19.1470	RPS26A	196	317	2.11172
orf19.1478	STT3	39	45	2.39443
orf19.1483		0	6	4.83665
orf19.1491		5	18	2.03859
orf19.1493	RAD7	16	41	5.65819
orf19.1497	ZCF6	2	23	4.52258
orf19.1499	CTF1	71	84	2.25387
orf19.150	TIM17	5	0	-2.73575
orf19.1502		0	6	23.7436
orf19.1507	AMN1	3	21	3.25061
orf19.1508		1	10	5.84167
orf19.1509	ROD1	61	118	2.57138
orf19.1510	SRD1	38	57	2.26129
orf19.1517	ARO3	47	107	4.28703
orf19.1522		23	68	4.64319
orf19.1527		1	6	4.1392
orf19.1529		1	40	29.1883
orf19.1531		39	89	3.04816
orf19.1535		15	44	3.56325
orf19.1541		12	79	12.6015
orf19.1542	HEX3	118	181	2.36047
orf19.1547		0	5	2.56875
orf19.156	FGR51	12	17	2.63817
orf19.1567		26	47	2.66565
orf19.1576		21	42	2.56648
orf19.1578		471	749	2.03954
orf19.1580		1	12	3.95726
orf19.1584		8	57	9.06872
orf19.1587	HGT2	0	8	6.26566
orf19.1589		2	18	2.56207
orf19.1591	ERG1	27	47	2.31132
orf19.1596	FGR28	4	22	4.39696
orf19.1601	RPL3	421	724	2.04719
orf19.1605	PMS1	3	12	3.29772
orf19.1606		20	28	2.73964
orf19.1607	ALR1	137	300	3.0561
orf19.1608		10	37	3.77901
orf19.1609		23	78	2.83279
orf19.1611		1	25	32.9772
orf19.1613	ILV2	334	1021	4.75941
orf19.1616	FGR23	17	42	5.14444
orf19.1617		200	51	-2.54674
orf19.1618	GFA1	120	213	2.86058
orf19.1622	YCG1	28	53	2.77277
orf19.1623	CAP1	51	73	3.74621
orf19.1624		34	43	2.07066
orf19.163	PAN6	4	12	2.71146
orf19.1631	ERG6	20	67	4.03641
orf19.1633	UTP4	38	85	2.75153
orf19.164		17	34	2.87801
orf19.1648	RAD5	37	67	2.94382
orf19.1656		52	54	2.72611
orf19.1659	ALG8	12	20	2.2323
orf19.166	ASG1	22	238	15.7483
orf19.1661	DBP5	5	11	4.42138
orf19.1668		1	5	2.26129
orf19.1670	BRO1	47	83	2.36047
orf19.1671	UTR2	66	148	2.4144
orf19.1672		172	322	2.61953
orf19.1673	PPT1	10	36	6.43055
orf19.1674	CDC53	26	67	6.05581
orf19.1675		30	32	3.95726
orf19.1676		23	45	5.22886
orf19.168		0	5	4.6168
orf19.1686		4	16	4.43693
orf19.1690	TOS1	242	637	3.43174
orf19.1706	MET18	21	38	2.40192
orf19.1712	GEA2	103	165	2.4676
orf19.1714	PGA44	2	8	2.63817
orf19.1715	IRO1	54	90	2.45712
orf19.1718	ZCF8	30	55	2.63817
orf19.1720		16	23	2.03859
orf19.1725		14	26	2.63817
orf19.1727	PMC1	308	473	2.26696
orf19.1729		2	9	4.6168
orf19.1730		2	6	2.9313
orf19.1738	UGP1	24	44	2.13566
orf19.1742	HEM3	93	183	2.42161
orf19.1743	ACS1	2247	681	-2.04413
orf19.1747	KIP2	3	7	3.73741
orf19.1748		1	11	10.9924
orf19.1754		20	25	2.03211
orf19.1755	SET2	38	39	2.38755
orf19.1756	GPD1	68	93	2.59346
orf19.176	OPT4	168	760	5.54016
orf19.1762	OCA1	1	4	5.71604
orf19.1763	IFR1	6	18	3.34845
orf19.1767		11	49	9.55274
orf19.1768		7	18	6.69195
orf19.177		17	64	5.31983
orf19.1770	CYC1	75	38	2.53645
orf19.1773	RAP1	15	26	2.9313
orf19.1774		3	18	7.72608
orf19.1778		5	14	2.52825
orf19.1780		5	15	2.63817
orf19.1782.1		0	5	4.88062
orf19.1783	YOR1	237	585	3.49333
orf19.1789.1	LYS1	4	27	8.55008
orf19.1791		3	49	13.6576
orf19.1793		9	17	5.90721
orf19.1794		13	123	16.7712
orf19.1795.1		1	6	2.87095
orf19.1798	TSC2	48	83	2.87326
orf19.1799	GAP5	26	50	2.30073
orf19.1800		12	24	2.49932
orf19.1808	MED5	24	58	4.01632
orf19.1814	STT4	153	254	2.23984
orf19.1815		75	257	5.44519
orf19.182		15	28	3.0975
orf19.1821		2	10	2.44973
orf19.1822	UME6	90	159	2.47861
orf19.1823		13	40	5.27635
orf19.1832	FCY23	51	241	4.96856
orf19.1833		85	178	2.96554
orf19.1834		6	14	4.87047
orf19.1835	PEA2	33	88	5.35879
orf19.1843	ALG6	15	43	2.9764
orf19.1844		6	11	2.9313
orf19.1850	SIW14	1	6	2.16707
orf19.1854	HHF22	9	74	38.4978
orf19.1855		18	53	3.26474
orf19.1868	RNR22	5	12	2.58932
orf19.1871		121	117	2.43453
orf19.188		27	71	2.47988
orf19.1883	YCS4	42	55	10.0862
orf19.1886	RCL1	4	33	2.84111
orf19.1890		10	21	2.11054
orf19.1893		26	71	2.67815
orf19.1902	NOC4	26	53	2.20113
orf19.192		17	27	2.34504
orf19.1930	CFL5	3	16	9.45346
orf19.1932	CFL4	4	10	4.6168
orf19.1942	SGE1	9	49	6.12056
orf19.1943		8	22	3.95726
orf19.1960	CLN3	48	10	-2.84288
orf19.1961		45	80	3.76038
orf19.1964		35	59	2.40342
orf19.1971	TRY3	12	22	-4.49029
orf19.1979	GIT3	44	122	3.13283
orf19.198	ASN1	297	1060	4.54651
orf19.1980	GIT4	3	12	5.93589
orf19.1985		11	20	2.40031
orf19.1988	CDC45	3	20	4.11245
orf19.1989	DCW1	43	44	2.61329
orf19.1991		25	39	3.17622
orf19.1994		8	30	3.91177
orf19.2000		12	21	3.15781
orf19.2002		50	114	-2.53588
orf19.2003	HNM1	128	366	14.7801
orf19.2013	KAR2	302	843	4.10972
orf19.2021	HGT8	201	296	2.11054
orf19.2023	HGT7	109	789	9.27832
orf19.203	STB3	25	37	2.19848
orf19.2037		6	0	-2.15767
orf19.204		5	10	2.96795
orf19.2040		7	17	2.16106
orf19.2041		12	21	2.06657
orf19.2044	PGA27	0	14	5.07848
orf19.2049		1	5	-2.21113
orf19.2050		20	30	2.08501
orf19.2055	NPL6	0	5	5.93589
orf19.2063		53	82	2.0712
orf19.2064		9	21	3.05039
orf19.2070		9	18	2.33039
orf19.2072		4	10	7.91452
orf19.2073		36	54	2.39834
orf19.2078		4	11	3.69344
orf19.2081	POM152	33	70	2.25472
orf19.2082	SAP3	6	17	4.55685
orf19.2088		0	14	12.7512
orf19.2094	PDR6	19	115	4.09186
orf19.2097		36	42	2.49161
orf19.2098	ARO8	73	100	3.04589
orf19.2124		11	48	3.70896
orf19.2125		1	10	7.78261
orf19.2129		13	20	2.00611
orf19.2131		10	15	3.29772
orf19.2138	ILS1	351	659	2.76418
orf19.2149		6	17	2.01596
orf19.2160	NAG4	3	7	6.33162
orf19.2167		43	68	2.45164
orf19.2168.3		5	11	2.55139
orf19.217		1	9	10.113
orf19.2170	PHM7	340	658	2.16806
orf19.2183	KRE3	254	582	2.1802
orf19.2191.1		0	5	11.8718
orf19.2192	GDH2	1002	218	-2.57186
orf19.22		4	9	2.54166
orf19.22.1		0	8	8.35422
orf19.2204		20	26	2.87801
orf19.2204.2	RHO2	3	17	11.4321
orf19.2210		35	41	2.62301
orf19.2215	GLE1	17	88	2.70413
orf19.2222		5	20	4.74871
orf19.2228		0	5	21.1054
orf19.2232	RPL11	152	322	2.56082
orf19.2237.1		0	5	9.06872
orf19.2238	LTE1	35	93	3.1778
orf19.2242	PRB1	76	123	2.45164
orf19.2246		1	4	2.38692
orf19.2249		10	15	3.40764
orf19.225		6	23	2.59562
orf19.2251	AAH1	10	37	7.32093
orf19.2264	OLE2	8	28	2.57138
orf19.2267	RFA2	2	9	4.67676
orf19.2276		1	4	2.50288
orf19.2281		3	22	7.69467
orf19.229		17	22	2.98053
orf19.2309.2	RPL2	3	12	2.50789
orf19.231	APL2	19	59	3.0248
orf19.2311	RPL82	0	14	8.65651
orf19.2319		93	110	2.25248
orf19.232		1	4	5.93589
orf19.2320		1	6	2.31731
orf19.2324	UBA4	0	8	6.6969
orf19.2329.1	RPS17B	1	10	3.24317
orf19.2334	BIG1	1	4	2.50626
orf19.2336		1	5	3.62749
orf19.2340	CDC48	359	563	2.00015
orf19.2344	ASR1	28	4	-4.99083
orf19.2346		14	49	3.42138
orf19.2351	NIT3	2	20	8.69045
orf19.2356	CRZ2	9	75	4.86413
orf19.2360	URA2	705	1280	2.88928
orf19.2361	SPT1	2	10	6.97232
orf19.2364	MIS11	391	782	2.58118
orf19.2365	POL2	72	150	2.85802
orf19.2368		5	9	2.004
orf19.2370	DSL1	6	20	3.38374
orf19.238	CCP1	126	155	2.0516
orf19.239		138	250	2.2201
orf19.2395	IME2	4	8	6.08246
orf19.2397		28	36	2.63817
orf19.2397.3		18	34	2.58321
orf19.2398		0	8	16.4886
orf19.2400		11	22	2.19063
orf19.2404		11	22	-3.02572
orf19.2411	SYN8	2	10	2.44973
orf19.2417	SMC5	25	76	4.2797
orf19.2436		32	40	2.10077
orf19.2443	RGD1	18	28	3.92978
orf19.2444	CHS7	11	18	3.60212
orf19.2445		6	10	4.88838
orf19.2446		4	9	2.44275
orf19.2447		9	29	18.7568
orf19.2454	PHO87	31	84	6.29269
orf19.2455		53	87	2.58019
orf19.2461	PRN4	26	47	3.26774
orf19.247		0	5	16.4886
orf19.2479	UGA4	5	12	2.11797
orf19.248	APL5	48	76	2.29175
orf19.2495	GSL1	21	40	3.53327
orf19.250	SLC1	5	16	4.4646
orf19.2503		1	5	5.93589
orf19.2504	BMS1	182	359	2.44395
orf19.2510		7	26	4.55085
orf19.2513		8	15	6.33162
orf19.2516		11	20	4.38125
orf19.2525	LYS12	2	6	2.59492
orf19.2527		1	6	3.23176
orf19.2528		30	53	2.42921
orf19.2531	CSP37	1	5	3.15434
orf19.2533.1		5	19	3.5651
orf19.2534	PIN4	35	43	4.0557
orf19.2537		2	33	40.5619
orf19.2538	PTC2	181	228	4.51768
orf19.2539		12	98	11.7949
orf19.2540	SAS3	11	61	9.00883
orf19.2545	DOT6	22	32	2.37139
orf19.2547		9	26	2.70948
orf19.2551	MET6	779	1642	2.74479
orf19.2552		3	15	2.56875
orf19.2555	URA5	1	6	4.6168
orf19.2559	CDC4	88	127	2.13193
orf19.2560	CDC6	375	1027	3.59337
orf19.2565		11	43	3.06296
orf19.2571	SEC4	1	7	2.31977
orf19.2573	FRS1	107	226	2.8016
orf19.2579		2	21	4.76573
orf19.2593	BIO2	7	14	5.6929
orf19.2600	SPC98	13	31	2.3939
orf19.2602	OPT1	9	48	6.46353
orf19.2606	HDA1	38	75	3.16162
orf19.2608	ADH5	30	4	-3.17544
orf19.2614	RSR1	8	16	2.63817
orf19.2616	UGT51C1	72	147	4.13879
orf19.2619	PHO113	4	14	4.28703
orf19.262	SMC3	10	22	2.08855
orf19.2624		3	10	22.8642
orf19.2625		1	4	3.29772
orf19.263.1		54	145	3.2547
orf19.2631		9	21	2.01901
orf19.2633	HGT14	27	122	6.68337
orf19.2641	ARP1	1	4	4.79668
orf19.2647	ZCF14	8	16	4.26505
orf19.2649	PCL1	5	18	3.58792
orf19.265		18	46	6.23155
orf19.2650		29	48	2.48167
orf19.2650.1		1	5	3.72171
orf19.2663		13	22	2.3084
orf19.2664		39	52	2.07047
orf19.2672	NCP1	159	265	2.40877
orf19.2677		4	9	2.7437
orf19.2678	BUB1	10	23	2.84645
orf19.268		0	35	11.966
orf19.2681	RBT7	3	13	5.08791
orf19.2685	PGA54	237	378	2.24783
orf19.2686		43	53	2.09641
orf19.2687.1		0	5	47.4871
orf19.2694	TYS1	35	56	2.76915
orf19.2711		54	105	2.22271
orf19.2713		2	7	3.0339
orf19.2717	SAS1	5	22	2.0773
orf19.272	FAA21	89	145	4.1457
orf19.2720		4	22	2.14352
orf19.2725		10	20	2.49161
orf19.2727	GRX3	0	7	8.38008
orf19.2734		1	6	3.2035
orf19.2738	SUL2	17	83	6.01632
orf19.274	TFC4	31	55	3.35768
orf19.2740		6	14	3.95726
orf19.2746	EMP7	51	99	3.01506
orf19.2748	ARG83	36	108	3.84547
orf19.2749		7	32	9.74095
orf19.2753	ZCF15	33	45	2.68703
orf19.2755		0	6	2.50626
orf19.2758	PGA38	22	73	6.18956
orf19.2760		93	137	2.23413
orf19.2761		5	17	5.87593
orf19.2765	PGA62	759	1808	3.00546
orf19.2767	PGA59	783	1274	2.1829
orf19.2768	AMS1	372	1499	4.97642
orf19.2779		31	33	2.86511
orf19.2782		24	42	4.19954
orf19.2783	PIR32	3	13	6.742
orf19.2787	PRY1	1	8	4.78169
orf19.2796		0	5	3.70993
orf19.2798		2	12	3.40764
orf19.2800		2	6	2.26343
orf19.2810	AAP1	23	45	4.07365
orf19.2818		20	47	2.63817
orf19.2823	RFG1	247	2522	9.55621
orf19.2825	DRE2	60	147	5.47177
orf19.2826		15	47	4.18398
orf19.2827		15	480	13.2865
orf19.2830	RRP9	10	54	2.90012
orf19.2833	PGA34	0	8	40.8917
orf19.2843	RHO1	60	153	3.13795
orf19.2847		19	42	3.68856
orf19.2848		43	88	5.08791
orf19.2849	AQY1	7	17	9.51627
orf19.2864.1	RPL28	0	6	2.02412
orf19.2873	TOP2	41	80	2.55966
orf19.288	MET13	65	185	3.65575
orf19.2881	MNN4	111	488	4.81027
orf19.2882	XUT1	35	92	3.36096
orf19.2883	CSO99	5	29	8.60547
orf19.2885	PRI2	7	22	4.79668
orf19.2886	CEK1	71	78	2.7562
orf19.2887		14	24	4.97769
orf19.2892		104	172	2.12123
orf19.2893		27	52	2.52347
orf19.2898		26	70	3.59241
orf19.2903	AGO1	93	183	2.49479
orf19.2915		11	17	2.71812
orf19.2925		0	6	5.93589
orf19.2926		7	20	3.79897
orf19.2927	MNN11	11	47	9.08023
orf19.2928		13	19	4.33414
orf19.2934		6	15	3.22443
orf19.2938		7	37	5.30383
orf19.2939		0	5	7.6507
orf19.2941	SCW4	6	15	6.59543
orf19.2945	PUT4	6	42	5.02902
orf19.2946	HNM4	3	7	2.68366
orf19.2947	SNZ1	102	147	2.97231
orf19.2951	HOM6	1	86	41.4193
orf19.2952	EXG2	30	2	-2.6289
orf19.2958		19	26	2.02574
orf19.2959		6	11	3.07787
orf19.2960	FRS2	91	206	2.96242
orf19.2970	LYS2	416	1267	4.61558
orf19.2972	PDE2	45	96	2.7381
orf19.2980		7	11	2.07686
orf19.2988		37	212	5.62699
orf19.2991	HOL1	20	35	3.0354
orf19.2996		47	60	2.00731
orf19.30	SPF1	142	217	2.2323
orf19.300	AIP2	163	301	2.23645
orf19.3003.1	RPL6	194	354	2.12718
orf19.3007		0	5	2.87801
orf19.3009		2	7	2.01334
orf19.3012	ARO8	24	43	2.41296
orf19.3014	BMH1	311	513	2.24442
orf19.3016		0	7	7.03513
orf19.3019		9	20	2.42542
orf19.3035		81	126	2.27842
orf19.304		3	24	3.06369
orf19.3052	YPT1	2	12	2.44129
orf19.306	USO5	6	11	4.31377
orf19.3066	ENG1	35	59	2.54395
orf19.3077	VID21	19	43	2.78954
orf19.31		4	16	4.50041
orf19.3100		3	11	3.29772
orf19.3110		12	30	2.15851
orf19.3126	CCT6	118	202	2.13452
orf19.3133	GUT2	190	540	4.07718
orf19.3142		3	40	38.7812
orf19.3147		0	6	26.3817
orf19.3148		17	27	2.24733
orf19.3149	LSP1	151	270	2.95903
orf19.3150	GRE2	19	23	2.49161
orf19.3153	MSS4	66	83	4.02447
orf19.3156		29	52	2.61179
orf19.3158		12	26	3.6746
orf19.3159	UTP2	231	368	2.07404
orf19.3160	HSP12	5	0	-6.91766
orf19.3173		6	10	3.4626
orf19.3180		12	44	3.5212
orf19.3181.1		7	61	3.82387
orf19.3190	HAL9	35	63	3.36238
orf19.3192	STI1	75	93	2.64746
orf19.3195	HIP1	100	155	2.14856
orf19.3197	PAP1	11	15	2.17261
orf19.3203	RCY1	9	26	2.40877
orf19.3204		8	33	4.59898
orf19.3207	CCN1	8	16	5.93589
orf19.3208	DAL52	1	4	3.95726
orf19.3209	FGR42	6	28	7.31494
orf19.321		11	53	5.07341
orf19.3212	MID1	5	10	17.0539
orf19.3214		88	527	7.26001
orf19.3215		53	75	3.46938
orf19.3216		55	67	2.94494
orf19.3219		60	68	3.0017
orf19.3221	CPA2	67	152	6.95866
orf19.3222		36	51	2.59562
orf19.3226		13	22	3.27134
orf19.3227	FTH2	14	42	3.0115
orf19.3228		14	33	2.21607
orf19.3229		2	30	17.5878
orf19.3232		3	12	10.5527
orf19.3239	CTF18	3	15	6.59543
orf19.3247		132	256	2.58082
orf19.325		27	52	2.04144
orf19.3252	DAL81	19	35	3.75207
orf19.3260		70	105	2.76334
orf19.3264.1		124	524	5.08791
orf19.3265	TRM1	35	62	2.20535
orf19.3275		1	4	3.69344
orf19.3281		13	17	4.72941
orf19.3287	BUD22	0	5	2.45623
orf19.3295		1	5	3.25223
orf19.3301		115	136	2.26883
orf19.3302		57	66	2.42134
orf19.3303		20	61	3.62047
orf19.3305	ZCF17	30	37	2.63817
orf19.3315	CTA9	4	8	3.35768
orf19.3325		49	121	3.69716
orf19.3329		30	32	2.08277
orf19.3331	ABC1	88	171	2.03059
orf19.3338		4	20	3.27644
orf19.3345	SIZ1	87	87	2.68673
orf19.335		15	22	2.17649
orf19.3350	MRP2	1	4	3.29772
orf19.3356	ESP1	27	60	2.24476
orf19.3360		70	102	2.18474
orf19.3363	VTC4	146	233	2.32018
orf19.3369	MOH1	42	68	3.06434
orf19.3371	JAB1	19	23	2.19848
orf19.3375		2	7	5.93589
orf19.3378		2	7	5.27635
orf19.34	GIT1	27	144	6.01504
orf19.3406		21	39	2.34138
orf19.3409	SEC12	37	58	2.52976
orf19.3412	ATG15	9	21	2.1066
orf19.3418		1	5	3.29772
orf19.3419	MAE1	101	200	2.42193
orf19.3426	ANB1	256	360	2.27842
orf19.3428		55	93	3.89035
orf19.3429	FGR47	30	84	3.62225
orf19.3430		32	96	3.92658
orf19.3432		29	42	2.18592
orf19.3433	OYE23	4	27	8.99377
orf19.3438		17	61	5.02509
orf19.3439		11	22	2.37907
orf19.3440	FRP5	22	94	4.95657
orf19.3442		45	15	6.5486
orf19.3443	OYE2	1	8	102.669
orf19.3444		2	7	9.04517
orf19.3445	HOC1	17	37	3.18256
orf19.3447		2	8	6.00917
orf19.345		9	14	2.48597
orf19.3450.1		6	24	18.0903
orf19.3461		2	12	6.26566
orf19.3462	SAR1	40	88	2.61329
orf19.3463		65	136	2.42686
orf19.3467	SEC27	81	151	2.17862
orf19.3469		5	11	8.42186
orf19.3470		48	81	2.22751
orf19.3471		2	10	3.89562
orf19.3473		2	12	5.5276
orf19.3474	IPL1	4	13	6.47552
orf19.3475		296	524	2.96333
orf19.348	SKN2	22	39	3.13553
orf19.3483		20	57	4.74047
orf19.349		27	35	3.00629
orf19.3494	CTF5	0	5	10.5527
orf19.35.1		6	29	5.71604
orf19.3505		58	60	2.74177
orf19.3527	CYT1	285	350	2.57759
orf19.3528		6	12	2.73239
orf19.3536		4	18	2.13566
orf19.3538	FRE9	9	13	3.11784
orf19.3552		54	56	2.98365
orf19.3561	CDC7	4	18	4.20025
orf19.3564	RPC4	15	47	2.34962
orf19.3568	RXT3	26	49	3.53416
orf19.3569		11	45	4.3124
orf19.3591	APE3	27	64	2.95038
orf19.3600		1	4	8.35422
orf19.3601		2	13	6.76749
orf19.3603	MFG1	34	44	2.17011
orf19.3604		18	36	5.8545
orf19.3605	PEX17	2	18	35.9922
orf19.3606		8	15	6.42523
orf19.3609	UTP15	19	55	4.3577
orf19.3615		3	10	3.36367
orf19.3617	GTR1	9	53	6.34811
orf19.3618	YWP1	684	1642	3.06951
orf19.3621		5	9	3.371
orf19.3622	ANP1	45	95	3.64225
orf19.3623	SMC2	15	31	2.48597
orf19.3624	MSU1	46	137	3.14412
orf19.3626		8	14	2.42281
orf19.3628	RSP5	124	155	2.68827
orf19.3629	DSE1	24	78	4.88062
orf19.3630	RRP8	38	114	2.48114
orf19.3638	PGA46	1	9	7.03513
orf19.3644		67	28	-2.73821
orf19.3646	CTR1	13	17	2.70857
orf19.3655		1	4	9.6733
orf19.3668	HGT2	60	128	2.53748
orf19.3674	GAL12	0	6	15.1695
orf19.3678		15	58	3.38483
orf19.3681		111	362	4.15799
orf19.3683	AGE3	4	29	7.14505
orf19.3690.2		70	92	2.2288
orf19.3693	PGA5	4	12	2.98228
orf19.3694		24	54	2.85291
orf19.3697		10	16	3.76184
orf19.3698		5	46	11.6833
orf19.3699	TEP1	1	4	3.07787
orf19.3700	TOM7	72	171	3.08653
orf19.3701		2	7	3.40764
orf19.3708	SAP2	18	29	3.371
orf19.3710	YHB5	201	428	2.34554
orf19.3711		6	13	4.1457
orf19.3714		17	26	3.4938
orf19.3721		0	7	10.113
orf19.3722		95	462	6.68337
orf19.3726		24	33	2.01217
orf19.3727	PHO112	1	6	9.23361
orf19.3737		30	66	2.33196
orf19.3746	IFC1	43	79	2.39589
orf19.3749	IFC3	107	337	3.77405
orf19.3752	RAD51	16	45	3.67956
orf19.3756	CHR1	15	41	2.97394
orf19.3763		1	6	5.40197
orf19.3764	GSG1	5	16	2.83804
orf19.3765	RAX2	152	153	2.61868
orf19.3769		9	16	2.15451
orf19.3770	ARG8	0	32	51.8841
orf19.3773	CDL1	17	93	4.3132
orf19.3775	SSK2	167	266	8.63233
orf19.3781		6	11	3.70993
orf19.3782.2		30	59	2.48167
orf19.3785		2	9	4.28703
orf19.3788	SPC34	0	7	10.7481
orf19.3795	AGP3	14	22	2.85802
orf19.3798		1	6	2.98228
orf19.3799		86	201	2.45787
orf19.3801	FAV1	3	20	9.23361
orf19.3806		0	8	3.73741
orf19.3813		16	45	2.99792
orf19.3825	RCE1	21	36	2.21141
orf19.3827		24	27	2.3845
orf19.3841		35	132	4.16163
orf19.3846	LYS4	131	196	2.08377
orf19.3852		24	40	3.51047
orf19.3854		81	100	2.11054
orf19.3856	CDC28	14	19	3.14551
orf19.3863		4	17	3.01506
orf19.3868		3	9	2.90199
orf19.3869		13	34	2.49161
orf19.3871	DAD3	1	10	11.4321
orf19.3874		11	18	2.9853
orf19.3878		8	28	5.83596
orf19.3886		1	12	27.7008
orf19.3894		1	8	8.39419
orf19.3900		19	54	2.32639
orf19.3901		15	82	5.75122
orf19.3902		57	182	4.63679
orf19.3911	SAH1	87	165	2.17709
orf19.3914		52	92	3.40508
orf19.3919		12	16	2.32576
orf19.3924		16	20	4.89947
orf19.3931	SFC1	83	25	-2.23175
orf19.394		4	12	2.49557
orf19.3945		15	24	2.15322
orf19.3955	MES1	145	453	3.74661
orf19.3957		0	6	3.16581
orf19.3959	SSD1	256	448	2.20125
orf19.3968		4	35	7.83693
orf19.3970		1	14	12.2675
orf19.3971		2	10	3.47128
orf19.3972		3	50	45.0192
orf19.3983		31	136	15.829
orf19.3991		17	23	2.84111
orf19.3996		9	13	2.57822
orf19.4011		0	7	15.3893
orf19.4012	PCL5	0	21	6.11577
orf19.4026	HIS1	0	6	5.44123
orf19.403	PCL2	1	4	2.07285
orf19.4036	APM1	2	6	3.34845
orf19.4040	ILV3	46	201	5.28218
orf19.4056	BRG1	222	62	-2.08074
orf19.406	ERG1	43	45	2.17261
orf19.4060	ARO4	91	317	3.06459
orf19.4068		3	12	3.82535
orf19.4070		1	7	10.5527
orf19.4072	IFF6	26	37	2.15851
orf19.4076	MET1	292	556	2.50544
orf19.4080		0	7	3.83163
orf19.4082	DDR48	0	19	2.48428
orf19.4099	ECM17	767	1259	2.43652
orf19.4127		22	55	2.63817
orf19.413.1	RPS27A	0	10	12.2016
orf19.4144		6	14	2.71146
orf19.4148		10	1	-2.89456
orf19.4152	CEF3	1568	2356	2.2623
orf19.4159		26	3	-3.87473
orf19.4162	MLH1	6	14	4.45192
orf19.4167		0	5	3.73741
orf19.4170	CSP2	0	5	3.51756
orf19.4171		4	32	6.48551
orf19.4175	TOK1	26	64	2.20301
orf19.4208	RAD52	1	9	3.62749
orf19.4210		5	10	2.26883
orf19.4211	FET3	62	92	2.09124
orf19.4222	SST2	6	16	4.51375
orf19.4234		8	31	3.184
orf19.4236	RET2	17	5	-2.24622
orf19.4239		7	11	2.10229
orf19.4240		2	7	2.05622
orf19.4245		6	0	-3.41145
orf19.4251	ZCF22	2	9	3.24698
orf19.4253		8	12	3.18779
orf19.4257	INT1	103	150	3.85501
orf19.4258		5	0	-2.2743
orf19.4261	TIF5	69	173	2.53558
orf19.4263		12	29	2.91426
orf19.4264		16	36	3.83734
orf19.4266	SPR28	2	13	32.3684
orf19.4270	MNN13	5	27	4.6168
orf19.4273		90	167	2.24637
orf19.4275	RAD9	20	41	4.1881
orf19.4279	MNN1	26	41	2.27542
orf19.428		12	17	2.34862
orf19.4282	IFH1	139	300	2.50346
orf19.4284	BUR2	5	12	2.98016
orf19.4294		1	8	2.91298
orf19.4295		36	46	2.84923
orf19.4309	GRP2	200	414	2.74928
orf19.4312		18	31	2.20662
orf19.4315		21	47	3.38227
orf19.4326		37	60	2.58433
orf19.4328	CCC2	89	137	2.50099
orf19.4330		7	14	2.53404
orf19.4335	TNA1	65	355	6.53408
orf19.4337		26	124	3.96757
orf19.4341		7	13	2.63817
orf19.4348	MED14	45	55	2.00907
orf19.4355		7	14	3.84734
orf19.4357		8	16	2.12201
orf19.4365		9	38	5.4874
orf19.4366		5	14	4.10383
orf19.4368		21	39	2.80306
orf19.437	GRS1	93	320	4.75475
orf19.4374	PRP42	2	13	2.17936
orf19.4381	VTC3	73	111	2.09551
orf19.4388		11	19	2.13783
orf19.4391		53	7	-3.0723
orf19.4394		2	7	3.95726
orf19.4401	YVH1	0	6	3.33651
orf19.4404	PGA49	11	34	3.69344
orf19.4405	PPS1	19	27	2.19848
orf19.4412		22	57	2.36117
orf19.4424	PHO1	3	18	3.41411
orf19.4435		35	73	2.85402
orf19.4438	RME1	2	11	20.226
orf19.4441		1	7	4.94658
orf19.4444	PHO15	9	18	2.004
orf19.4449		23	32	4.43213
orf19.445		21	37	2.91109
orf19.4455		21	44	2.63817
orf19.4457	BNI4	77	137	2.79336
orf19.4459		15	27	3.33651
orf19.446.2		18	6	-2.29425
orf19.4465		6	22	6.25345
orf19.4468		0	5	6.69314
orf19.4471		38	248	7.69085
orf19.4476		156	228	2.07285
orf19.4481	MFALPHA	2	8	2.01334
orf19.4490	RPL17B	295	252	8.4273
orf19.4490.2	QCR8	1	40	6.65578
orf19.4494	KTR2	12	26	2.70305
orf19.4495	NDH51	398	645	2.83974
orf19.4505	ADH3	2	6	2.63817
orf19.4506	LYS22	222	1807	9.77347
orf19.4510	IFA4	10	40	5.39626
orf19.4511		15	28	4.58209
orf19.4519	SUV3	21	81	3.71982
orf19.4526	HSP3	0	9	5.771
orf19.4532		22	62	2.76262
orf19.4536	CYS4	2	7	5.58935
orf19.4550		37	92	4.66282
orf19.4560	BFR1	45	441	6.23754
orf19.4565	BGL2	6	15	3.18624
orf19.4568	ZCF25	10	29	4.44324
orf19.4575		34	45	2.02785
orf19.4577		14	21	2.45992
orf19.4589		0	8	6.46353
orf19.4592	HSX11	10	22	2.63817
orf19.4595		1	5	3.22443
orf19.4596		11	1	-2.46383
orf19.4623		23	3	-3.23017
orf19.4623.3	NHP6A	32	89	2.84007
orf19.4629		17	80	2.66053
orf19.4633		0	18	7.70114
orf19.4635	NIP1	110	110	2.10955
orf19.4640	PWP1	28	43	2.07686
orf19.4642		3	9	4.907
orf19.4643		95	141	3.6705
orf19.4645	BEM1	33	38	3.21857
orf19.4647	HAP3	20	123	8.49363
orf19.4649	ZCF27	62	83	2.38771
orf19.4650	ILV6	95	400	4.9253
orf19.4651	PGA53	36	161	4.97655
orf19.4653		24	270	10.3988
orf19.4654		1	18	9.23361
orf19.4655	OPT6	17	71	5.48245
orf19.4658		54	122	2.49451
orf19.4660	RPS6A	7	76	3.6219
orf19.4673	BMT9	12	24	3.89131
orf19.4674.1	CRD2	1	10	15.0046
orf19.4686		125	343	3.90305
orf19.4688	DAG7	30	152	5.38403
orf19.4689	PGA57	2	10	2.89184
orf19.469	HST7	20	34	2.00137
orf19.4690		6	10	2.4623
orf19.4698	PTC8	57	81	2.16269
orf19.4703		4	13	2.49161
orf19.4704	ARO1	261	935	3.99799
orf19.4705		8	16	-2.99686
orf19.4707		1	10	7.25498
orf19.4718	TRP5	143	499	3.62057
orf19.4719	CWH41	22	58	2.84509
orf19.4728		91	96	2.15671
orf19.473	TPO4	41	71	2.51604
orf19.4731		0	9	18.4672
orf19.4743	AFG1	2	11	4.28703
orf19.4749		34	5	-3.08294
orf19.4750		14	18	2.3278
orf19.4753	PFK26	64	118	-2.29001
orf19.4756		12	24	3.25061
orf19.4757	NAR1	24	67	2.74965
orf19.4758		8	13	2.09565
orf19.4761	HST1	9	32	5.69162
orf19.4763		2	7	5.10047
orf19.4764		48	79	2.24245
orf19.4765	PGA6	3	49	12.0602
orf19.477		0	6	6.71535
orf19.4771		59	81	2.29406
orf19.4779		45	50	2.11054
orf19.478		1	13	6.90581
orf19.4784	CRP1	33	79	2.98416
orf19.4787		7	17	2.56489
orf19.4788	ARG5,6	94	290	4.28239
orf19.4789		0	11	23.7436
orf19.4791		12	28	3.95726
orf19.4792		57	85	2.29949
orf19.4800	RIM2	4	14	3.95726
orf19.4802	FTH1	3	8	2.53671
orf19.4805		104	196	2.3345
orf19.4808	NUP188	93	115	3.01607
orf19.4813	GUA1	80	94	2.02231
orf19.4816		4	43	2.44129
orf19.4821	LIP1	1	6	14.0703
orf19.4823	LIP6	9	15	2.51826
orf19.4827	ADE12	108	263	3.75385
orf19.4849		6	11	2.43524
orf19.485		1	4	2.47988
orf19.4853	HCM1	6	12	2.13783
orf19.486	NIP1	8	15	2.63817
orf19.4863	PDC2	26	83	2.17261
orf19.4865		23	45	2.31573
orf19.4869	SFU1	12	25	2.53671
orf19.4874	MNN23	54	88	2.34504
orf19.4882		0	7	14.7394
orf19.4884	WOR1	2	14	4.28703
orf19.4889		23	37	3.79737
orf19.4899	GCA1	8	18	6.27566
orf19.4901		4	15	6.03011
orf19.4905		5	0	-5.3067
orf19.4910	FGR41	7	62	13.7405
orf19.4919		1	9	16.4886
orf19.4924		39	65	2.14352
orf19.493	RPL15A	188	76	-2.32527
orf19.4931.1	RPL14	1	6	5.47928
orf19.4934	OP4	32	88	3.42963
orf19.4939	MON2	63	140	2.67035
orf19.4943	PSA2	26	7	-3.0723
orf19.4945	MSH6	6	25	4.28703
orf19.4948	REX3	8	37	3.20198
orf19.4951		24	99	4.42836
orf19.4955		1	5	3.05039
orf19.4962	RMP1	7	28	5.78369
orf19.4965		4	10	5.74191
orf19.4966	AGC1	149	256	2.11719
orf19.4969	KEM1	136	263	2.22434
orf19.4972		3	8	2.80306
orf19.4975	HYR1	28	42	2.3084
orf19.4981		6	12	2.32974
orf19.4984		11	27	3.87306
orf19.4993	SEC18	96	252	3.4045
orf19.50		26	52	3.6594
orf19.500		2	8	3.6055
orf19.5004	RAD54	9	15	2.13783
orf19.5005	OSM2	84	25	-2.28046
orf19.5006	GCV3	0	5	6.70536
orf19.5009		6	31	3.7419
orf19.5011	KAR9	5	23	8.17834
orf19.5019		37	261	6.35002
orf19.5025	MET3	84	181	4.28703
orf19.5027	LCB2	55	77	2.05622
orf19.5031	SSK1	31	40	3.03639
orf19.5034	YBP1	18	31	2.44669
orf19.5037	HRQ2	7	12	2.44275
orf19.504		33	52	2.01004
orf19.5040		8	38	2.51255
orf19.5046	RAM1	8	55	8.96979
orf19.5052		13	3	-6.08777
orf19.5058	SMI1	54	80	2.11054
orf19.5061	ADE5,7	218	447	2.90199
orf19.5070		86	91	3.19747
orf19.5079	CDR4	170	48	-2.2743
orf19.508	QDR1	1	13	5.01253
orf19.5087	BUD6	10	14	2.34504
orf19.5094	BUL1	65	232	3.66871
orf19.5097	CAT8	63	118	2.83425
orf19.51		303	459	2.11382
orf19.5100	MLT1	372	1535	5.14495
orf19.5102	PLB5	47	85	2.05191
orf19.5113	ADH2	504	178	-2.28009
orf19.5117	OLE1	2553	731	-2.6438
orf19.5121	OPT5	10	14	2.44973
orf19.5124	RBR3	7	46	5.71604
orf19.5131		39	56	2.49557
orf19.5136		11	24	8.07941
orf19.5139		27	49	2.69953
orf19.5141		2	11	4.52258
orf19.5145	SSP96	1	7	3.29772
orf19.5160		64	109	2.21927
orf19.5172	LIP9	0	5	5.93589
orf19.5177		22	67	4.6168
orf19.5178	ERG5	92	158	2.26978
orf19.5181	NIK1	83	125	2.47582
orf19.5188	CHS1	38	96	3.09921
orf19.5211	IDP1	2	7	10.502
orf19.5212		1	25	24.0733
orf19.5221		32	76	3.73273
orf19.5228	RIB3	1	6	3.07787
orf19.5231		0	6	5.77886
orf19.5234	RBD1	36	47	2.09588
orf19.5243	TRP3	15	38	3.19076
orf19.5258		1	17	3.73741
orf19.5263	SER33	12	20	3.4469
orf19.5271		7	16	2.19848
orf19.5274		73	113	3.01172
orf19.5277		1	4	4.23992
orf19.5288	IFE2	84	6	-2.65335
orf19.5289		2	17	4.20459
orf19.5291		3	29	4.20154
orf19.5292	AXL2	115	249	3.46683
orf19.5293		74	100	2.67407
orf19.5294	PDB1	80	140	2.27984
orf19.5303	PGA3	2	7	3.13283
orf19.5307	JEN2	581	170	-2.21348
orf19.5312	MET4	46	53	2.05191
orf19.5316	FGR29	18	42	3.5558
orf19.532	RBR2	11	19	2.80306
orf19.5321		6	18	2.23671
orf19.5334		1	8	2.3084
orf19.5343	ASH1	13	24	2.03097
orf19.536		45	58	2.11372
orf19.5376		10	31	3.88398
orf19.5383	PMA1	3175	7320	3.00925
orf19.5384	CHS8	257	483	2.63362
orf19.5387	VPS8	32	52	2.03598
orf19.5388	SWD1	2	18	8.17834
orf19.5392	NGT1	5	10	3.69344
orf19.541		21	35	4.11646
orf19.5418		8	0	-2.52958
orf19.5431		0	5	6.3925
orf19.5438		0	9	7.63186
orf19.5468		1	8	2.63817
orf19.5480	ILV1	76	81	3.47021
orf19.5483		12	16	4.75597
orf19.5487	CDC46	8	12	2.40539
orf19.5498	EFH1	3	14	9.76124
orf19.5500	MAK16	10	25	2.32092
orf19.5504		32	107	17.1481
orf19.5505	HIS7	69	330	4.78939
orf19.5507	ENP1	39	65	2.55774
orf19.5515		1	6	2.68166
orf19.5517		22	36	2.90199
orf19.5548	LYS14	4	25	4.43693
orf19.5552		11	20	2.95475
orf19.5558	RBF1	9	13	2.69314
orf19.556		32	55	4.3481
orf19.5563	RNH1	17	37	4.59238
orf19.5575		5	15	2.3278
orf19.5578		1	10	9.6733
orf19.558	GUT1	10	40	2.74141
orf19.5584	PEP3	9	15	2.63817
orf19.5585	SAP5	4	10	5.49619
orf19.5586		14	23	2.7638
orf19.5588	PGA6	3	23	4.11245
orf19.5591	ADO1	5	23	2.8168
orf19.5595	SHE3	31	69	2.55023
orf19.5604	MDR1	275	763	3.79059
orf19.5612	BMT4	28	67	3.58965
orf19.5619		17	29	2.50626
orf19.5620		5	41	8.09646
orf19.5621		10	37	5.02104
orf19.5622	GLC3	47	47	5.07758
orf19.5623	ARP4	12	23	9.86448
orf19.5625		3	7	2.82661
orf19.5628		7	13	2.74659
orf19.5636	RBT5	91	17	-3.65011
orf19.5639	HIS4	300	1046	4.27993
orf19.564	KAR3	1	4	2.63817
orf19.5644		5	9	4.21983
orf19.5645	MET15	0	7	14.9771
orf19.5663	RCH1	33	58	2.68852
orf19.5664	HOF1	4	8	3.13283
orf19.5676		24	60	3.02614
orf19.568	SPE2	24	29	2.15851
orf19.5680		4	28	2.77702
orf19.5685	THS1	17	63	2.66575
orf19.5689		7	0	-2.2743
orf19.570	IFF8	5	11	6.40699
orf19.5701		3	13	10.113
orf19.5711		55	102	2.18691
orf19.5713	YMX6	14	356	29.8338
orf19.5714	SAP1	14	158	11.4023
orf19.5722		6	47	4.9426
orf19.5730		1	5	5.80398
orf19.5742	ALS9	35	66	2.48114
orf19.5746	ALA1	219	504	3.10603
orf19.575	HYR3	120	228	2.39518
orf19.5753	HGT1	419	575	2.31362
orf19.5754		62	83	2.25021
orf19.5757		0	5	10.5527
orf19.5765	NUP82	16	29	2.92268
orf19.5780		8	32	3.87482
orf19.5782		38	71	2.15593
orf19.5785		12	27	3.86932
orf19.5789	ADE8	2	8	3.01506
orf19.5791	IDH2	37	55	4.13623
orf19.5812		21	72	3.00056
orf19.5816	EBP7	6	15	6.08809
orf19.5818	SUR2	12	36	2.26129
orf19.5830	LHS1	37	86	2.19229
orf19.5831		1	9	6.76032
orf19.5840		1	5	2.93603
orf19.5846		1	4	3.42963
orf19.5848		13	42	4.09859
orf19.5852		10	32	2.49932
orf19.5856		0	8	4.83665
orf19.5859	DAL8	2	18	3.9447
orf19.5866		1	6	8.24429
orf19.587		1	4	2.15219
orf19.5877	ATF1	38	133	3.90795
orf19.5887	NUP85	25	49	2.54675
orf19.5894		4	13	2.69553
orf19.5904	RPL19A	11	28	8.97228
orf19.5910		19	66	3.76882
orf19.5933		0	6	9.23361
orf19.5934		14	21	2.57536
orf19.5949	FAS2	2344	773	-2.28486
orf19.5956	PIN3	48	5	-3.10577
orf19.5958	CDR2	46	86	2.65426
orf19.5959	NOP14	88	120	2.49479
orf19.5965		49	96	2.2272
orf19.5973	PHB2	1	7	5.49619
orf19.5980		2	6	2.09622
orf19.5989		23	1	-11.978
orf19.5995	MCA1	30	39	2.37053
orf19.5996.1	RPS19A	1	6	6.81528
orf19.6000	CDR1	1108	1902	2.21202
orf19.6001	SAP3	1	7	3.48092
orf19.6002	RPL8B	6	30	4.459
orf19.6005	HGT5	17	40	3.24424
orf19.6008		17	59	4.89161
orf19.6010	CDC5	13	54	4.23707
orf19.6012		37	64	2.3666
orf19.6016		5	16	3.98657
orf19.6018	LRO1	62	148	2.84567
orf19.6022	NRM1	6	29	4.6168
orf19.6024		3	7	3.01506
orf19.6025		0	8	31.6581
orf19.6026	ERG2	4	9	3.2869
orf19.6027		7	22	4.17711
orf19.6029	ROT1	16	26	2.46858
orf19.6033	CMP1	23	48	2.50843
orf19.6034	TUB2	60	221	3.96594
orf19.6049		9	21	2.06995
orf19.6055		8	21	2.98228
orf19.607		61	103	2.19399
orf19.6073	HMX1	1	6	2.63817
orf19.6081	PHR2	39	139	4.58932
orf19.6086	LEU4	11	57	3.10624
orf19.6091	RIM8	15	42	4.71827
orf19.6092	KEL1	78	20	-2.39491
orf19.6112	CTA2	0	7	6.99116
orf19.6113		0	6	11.8718
orf19.6117		12	17	2.57536
orf19.6119		13	38	4.19709
orf19.6124	ACE2	19	36	3.22103
orf19.6134		18	35	3.54505
orf19.6138		9	17	2.51826
orf19.6148		10	21	4.92459
orf19.6166		8	24	2.32411
orf19.6168		33	46	2.04806
orf19.6198.1		7	16	3.95726
orf19.6199		22	40	2.34504
orf19.6200		2	8	5.71604
orf19.6202	RBT4	49	155	3.53983
orf19.6230		5	35	4.30137
orf19.6237	RAC1	46	96	2.85208
orf19.6239		0	5	2.90199
orf19.6240		2	12	2.77702
orf19.6243	VPS34	23	49	2.50948
orf19.6245		107	443	5.95353
orf19.6247		3	15	3.77901
orf19.6252		14	40	2.6794
orf19.6253	RPS23A	45	216	3.35288
orf19.6254	ANT1	46	17	-2.30187
orf19.6257	GLT1	981	1542	2.36931
orf19.6260		117	180	2.32725
orf19.6267		2	8	2.85802
orf19.6276		54	101	4.59796
orf19.6282		9	33	5.19875
orf19.6294	MYO1	74	259	4.04329
orf19.6296	VPS22	0	6	4.34523
orf19.6302	PGA39	3	9	2.75809
orf19.6304	LYS5	0	52	71.2307
orf19.6309	MSS11	24	31	4.51267
orf19.6310		57	87	3.01669
orf19.6312	RPS3	200	524	2.90136
orf19.6313	MNT4	8	22	3.41411
orf19.6316		2	11	2.63817
orf19.6317	ADE6	146	232	2.2334
orf19.634		2	7	4.52258
orf19.6340		5	22	14.0153
orf19.6343	FEN1	4	19	5.09809
orf19.6347		0	5	3.95726
orf19.6348		34	50	2.65786
orf19.6349	RVS162	12	20	16.3127
orf19.6353		14	24	3.95726
orf19.6356		8	36	2.65911
orf19.6369	RIO2	1	13	6.10945
orf19.6398		1	5	29.0199
orf19.6414		16	24	2.17471
orf19.6414.3	TPM2	85	164	2.91398
orf19.6416		24	50	2.06466
orf19.6418		48	21	-2.12757
orf19.6420	PGA13	6	17	2.17649
orf19.643		32	51	2.2323
orf19.6431		2	9	2.3084
orf19.6432		3	14	2.34862
orf19.6434	PEX19	0	5	5.27635
orf19.644	HGT9	2	11	3.82535
orf19.6440		22	40	2.82223
orf19.6449		11	0	-5.91318
orf19.6452	RBP1	7	0	-6.19115
orf19.6453		28	41	2.43349
orf19.6456		8	19	3.29772
orf19.6457		15	24	2.74585
orf19.6476		33	153	2.64563
orf19.6480		3	7	3.34169
orf19.6481	YPS7	9	24	2.95657
orf19.6488		4	14	7.16076
orf19.649		65	154	2.6515
orf19.6492		15	29	2.82367
orf19.6506		3	48	4.04669
orf19.6508		0	11	7.76796
orf19.651	LYP1	6	15	3.73741
orf19.6515	HSP9	1540	3038	2.45078
orf19.6520		1	8	7.91452
orf19.6536	IQG1	43	159	4.65245
orf19.655	PHO84	1044	2498	2.89784
orf19.6556		84	125	2.66943
orf19.6559		2	11	5.10047
orf19.6561	LAT1	30	67	6.21369
orf19.657	SAM2	328	644	2.56101
orf19.6573	BEM2	781	1113	2.24433
orf19.6574	ALK6	3	10	7.69467
orf19.6577	FLU1	86	85	2.42344
orf19.6579		18	34	2.43524
orf19.658	GIN1	16	35	2.63817
orf19.6583		10	18	3.55139
orf19.6584	PRT1	143	218	2.76786
orf19.6586		122	283	2.2715
orf19.6587	GIR2	21	1653	42.9881
orf19.6588	NBP2	28	55	2.47665
orf19.6592		11	20	52.2998
orf19.6594	PLB3	100	119	2.17543
orf19.6596		0	10	25.942
orf19.660		14	21	2.12201
orf19.6600		13	128	5.77546
orf19.6601		36	91	3.82885
orf19.6604		11	30	6.05228
orf19.6605		1	4	4.39696
orf19.6606		5	9	2.15219
orf19.6608		28	40	2.09234
orf19.661	KRR1	28	50	2.00433
orf19.6610		17	30	2.62882
orf19.6632	ACO2	106	113	2.19848
orf19.6634	VMA2	16	34	3.05532
orf19.6636		1	40	67.933
orf19.6637		5	0	-4.39698
orf19.6645	HMO1	1	4	2.96795
orf19.6649	BRF1	2	9	2.78474
orf19.6654		22	4	-2.15767
orf19.6656	DUR3	8	19	5.67207
orf19.6670	CAC2	2	6	5.15643
orf19.6672	MDJ1	37	100	2.83085
orf19.6679		22	28	2.01985
orf19.6689	ARG4	13	40	3.78887
orf19.6690		15	32	2.59562
orf19.6692	MNN26	42	83	2.40103
orf19.6693		45	79	2.00306
orf19.6698		0	6	7.58475
orf19.670.2		288	40	-3.16507
orf19.6701		83	123	2.44355
orf19.6702	DED81	61	215	4.53341
orf19.6703		5	14	2.63817
orf19.6719		58	95	2.32062
orf19.6737		5	10	2.96795
orf19.6739		19	52	2.11323
orf19.6742		34	54	2.63817
orf19.675		20	4	2.52402
orf19.6755	DLD2	1	23	9.04517
orf19.6769		47	83	3.05788
orf19.6770		10	24	2.9313
orf19.6773	ECM29	135	209	2.82093
orf19.6779	PRO2	5	29	7.08789
orf19.6780	MET8	0	5	4.00275
orf19.6781	ZFU2	14	36	2.55823
orf19.6782	BMT1	51	113	2.80547
orf19.6783		75	464	10.3916
orf19.6785	RPS12	4	66	13.4226
orf19.6789		33	55	3.13943
orf19.6790		51	83	2.98734
orf19.6791	HHT1	75	105	3.03166
orf19.6793		11	44	4.21093
orf19.6797		21	53	3.79237
orf19.6801	RPD31	16	20	2.04046
orf19.6804		11	21	2.31645
orf19.681	HAP43	42	55	2.27056
orf19.6821		9	14	2.63817
orf19.6824	TRY6	16	31	3.23588
orf19.6829		11	23	3.43905
orf19.6843		26	36	2.49161
orf19.6846	PHO85	2	23	14.2901
orf19.6847		6	16	2.15451
orf19.6852.1		38	3	-2.527
orf19.6861		3	17	4.06279
orf19.6869		4	14	2.08855
orf19.6875	VPS35	46	73	2.40262
orf19.688		7	1	-2.49439
orf19.6886		0	9	3.81593
orf19.6888		10	20	2.41833
orf19.6889	MKK2	35	46	5.85764
orf19.6891	RFC1	75	73	3.02862
orf19.6899		21	27	2.41296
orf19.69.2		6	22	7.69467
orf19.690	PLB2	7	17	3.51756
orf19.6900		6	17	10.1647
orf19.6915	MRE11	9	17	2.99468
orf19.6918		9	33	10.2641
orf19.6919		2	25	16.3237
orf19.6921		25	93	4.65803
orf19.6923		2	19	3.12274
orf19.6925	HTB1	1	5	2.3084
orf19.693		4	12	10.9296
orf19.6931		0	9	4.09859
orf19.6941		44	70	2.68366
orf19.6949		1	4	9.23361
orf19.695	RGS2	11	67	3.7205
orf19.696	STE2	5	16	6.43055
orf19.697		18	48	3.02425
orf19.6970		0	7	17.8077
orf19.6973		164	219	2.12233
orf19.6975	YST1	291	591	2.26558
orf19.6979		151	157	2.75223
orf19.6982		2	13	5.40826
orf19.6985	TEA1	16	29	2.22988
orf19.6986		1	11	3.18779
orf19.6988	OST1	6	12	2.44275
orf19.6991	PRE3	9	38	3.12415
orf19.6994	BAT22	192	1100	7.27076
orf19.6996	MNN14	45	86	2.4326
orf19.700	SEO1	21	354	20.9271
orf19.7002		63	282	5.27635
orf19.701	CFL11	46	162	4.58932
orf19.7010		11	20	2.36047
orf19.7017	YOX1	6	20	4.07718
orf19.7027		63	247	6.38251
orf19.7029		20	27	2.5043
orf19.7030	SSR1	128	418	3.69344
orf19.7033		45	66	2.69094
orf19.7034		63	87	4.07619
orf19.7038		17	31	5.29633
orf19.7042		51	75	2.73517
orf19.7049	CYB5	32	49	2.60252
orf19.7058		7	18	2.29105
orf19.706	NMD3	2	8	4.64978
orf19.7064	GLN4	65	66	2.12056
orf19.7071	FGR2	1	7	8.57406
orf19.7072	PEL1	10	51	2.89626
orf19.708		3	14	4.67676
orf19.7081	SPL1	0	8	3.89369
orf19.709	PUP2	12	2	-2.93132
orf19.7093	HGT13	37	7	-2.2743
orf19.7094	HGT12	12	46	4.69009
orf19.7095		18	78	5.10278
orf19.7100		0	24	9.76124
orf19.7101		2	26	8.79391
orf19.7108		0	5	3.87482
orf19.711		2	7	3.00206
orf19.712	KIP1	5	10	3.18779
orf19.714		4	28	9.88234
orf19.7153		56	138	2.45379
orf19.716		63	179	5.72879
orf19.717	HSP6	1100	1443	2.56371
orf19.7178	PRE5	0	23	72.5498
orf19.7181		3	12	7.3492
orf19.719		9	21	2.89626
orf19.7190	OGG1	4	14	3.13283
orf19.7196		164	292	2.63452
orf19.7197		31	137	4.33631
orf19.7201	SLA2	49	85	5.1145
orf19.7204		5	21	3.85579
orf19.7205	DUR7	11	26	2.96795
orf19.7212		2	18	6.99116
orf19.7213		37	100	2.10461
orf19.7214		8	1	-7.8337
orf19.7217	RPL4B	2	14	2.69654
orf19.7219	FTR1	82	227	2.89863
orf19.7222	PAM16	47	52	-3.34118
orf19.7223		26	38	-2.2966
orf19.7224		11	29	3.58914
orf19.7245		0	5	8.90384
orf19.7247	RIM11	377	141	-2.20126
orf19.7254		11	46	4.12215
orf19.726	PPZ1	29	45	3.06987
orf19.728	TSC11	36	38	3.75815
orf19.7293	MPS1	2	25	2.84923
orf19.7297		9	43	7.49174
orf19.7298	CHS2	104	171	2.25871
orf19.7299.1		1	5	2.3084
orf19.7301		3	14	6.78387
orf19.7308	TUB1	33	186	5.89791
orf19.731	EMP46	2	6	4.57801
orf19.7313	SSU1	25	48	2.26718
orf19.7314	CDG1	0	5	19.5225
orf19.7319	SUC1	1	7	3.79237
orf19.732		5	25	3.20978
orf19.7321		4	19	2.53472
orf19.7335	PRE8	0	5	6.59543
orf19.734	GLK1	17	0	-3.2851
orf19.7342	AXL1	18	166	8.00055
orf19.7344		17	34	3.54954
orf19.7345		1	17	4.88838
orf19.7353		15	87	2.53558
orf19.7354	LAC1	21	39	2.87634
orf19.7355	SSN8	8	16	3.34169
orf19.7359	CRZ1	107	53	2.17261
orf19.7363	KRE6	118	237	7.67224
orf19.7364		3	16	7.25498
orf19.7369	TRM12	8	22	3.32214
orf19.7370		22	45	2.52825
orf19.7371	ZCF35	37	85	3.24537
orf19.7377	ASE1	3	178	39.5726
orf19.7379	FAA2	34	47	2.0801
orf19.7391	OCH1	5	10	3.65286
orf19.7393		55	83	2.33039
orf19.7395		1	4	3.95726
orf19.7396		15	28	2.3084
orf19.7403		31	41	2.13083
orf19.7413	MMS21	3	8	4.17711
orf19.7414	ALS6	20	28	2.14962
orf19.7427		1	4	2.10077
orf19.7436	AAF1	47	56	2.14898
orf19.7445		41	42	2.48597
orf19.7449		9	13	4.12404
orf19.7450		11	15	2.33377
orf19.746		9	15	4.32211
orf19.7468		14	69	6.44887
orf19.7469	ARG1	59	139	2.24146
orf19.7472	IFF4	14	28	2.21846
orf19.7473		8	21	3.54071
orf19.7475	PHO81	45	55	2.82661
orf19.7491	RTT19	0	5	17.8077
orf19.7494		26	180	8.75727
orf19.7498	LEU1	58	145	3.38527
orf19.7499		11	34	3.88398
orf19.750		0	9	12.3115
orf19.7501		208	492	2.54336
orf19.7502		49	50	2.61205
orf19.7513	ALK2	14	37	4.12215
orf19.7514	PCK1	4135	1051	-2.95892
orf19.7516		68	93	2.03516
orf19.7518	ZCF38	0	7	7.3492
orf19.7520	POT1	15	0	-7.42938
orf19.7527		13	34	3.91846
orf19.7534	MIS12	123	173	2.12439
orf19.7538		4	11	3.42963
orf19.754	YBN5	25	56	2.781
orf19.7545		16	55	4.16831
orf19.7550	IFA14	6	20	4.17711
orf19.7561	DEF1	244	46	-2.11127
orf19.7565	GNP3	35	60	2.63817
orf19.7571	UBC4	62	64	2.40675
orf19.7574		52	111	2.16502
orf19.7585	INO1	111	27	-2.16974
orf19.7586	CHT3	3	74	7.98395
orf19.759	SEC21	56	112	2.32901
orf19.7590		395	732	2.09818
orf19.76	SPB1	239	569	3.03854
orf19.7600	FDH3	40	42	3.07609
orf19.7614		1	6	2.70582
orf19.762		1	7	10.5527
orf19.7634	MCD1	1	4	2.90199
orf19.7654	CPR6	49	63	2.1476
orf19.767	ERG3	22	60	11.1421
orf19.772	LYS21	74	144	2.26248
orf19.773		2	10	8.17834
orf19.775		21	28	2.15219
orf19.779	HAT1	7	21	3.95726
orf19.787		21	56	6.18486
orf19.787.1		0	5	2.82661
orf19.789	PYC2	629	2371	4.69916
orf19.794	SSN3	2	9	7.14505
orf19.797	BAT21	3	40	9.45346
orf19.801	TBF1	59	65	2.48767
orf19.813		232	750	2.8314
orf19.814	SSY1	20	75	2.28202
orf19.816	DCK2	25	29	2.50478
orf19.829	SCH9	170	741	4.60343
orf19.834		18	28	3.36154
orf19.836.1		4	13	11.4899
orf19.837.1	INO4	1	8	6.76032
orf19.844	STE11	33	46	2.16244
orf19.849		9	23	6.72734
orf19.85	GPX2	39	118	4.78169
orf19.850		20	48	3.2035
orf19.851		2	10	6.15574
orf19.857	FMO2	15	19	2.43524
orf19.864		58	82	2.2488
orf19.867		21	30	2.15451
orf19.868	ADAEC	222	64	-2.24622
orf19.88	ILV5	160	851	6.12162
orf19.881	DFG16	23	32	2.21266
orf19.893	PGA17	2	26	10.7725
orf19.894		18	3	-5.7399
orf19.895	HOG1	2	12	3.6705
orf19.897	VPS2	0	5	5.11146
orf19.900	NSP1	74	103	2.14352
orf19.915		37	57	2.0065
orf19.922	ERG11	46	136	3.19625
orf19.925	SAM51	4	9	3.83282
orf19.929		0	13	16.0929
orf19.930	PET9	1685	3713	2.99862
orf19.933		5	0	-2.61889
orf19.939	NAM7	158	291	2.4881
orf19.940	BUD2	74	115	2.25472
orf19.941	SEC14	151	205	2.67255
orf19.942	KRE62	0	6	20.4458
orf19.949		57	75	2.00573
orf19.952		4	14	3.64319
orf19.953.1	COF1	15	22	2.75809
orf19.961.2		1	119	102.449
orf19.966	DUS4	0	8	6.40699
orf19.969		109	98	2.26343
orf19.984	PHO8	19	24	2.29776
orf19.986	GLY1	61	60	4.06718
orf19.991	DJP1	2	15	5.88878
orf19.994		9	18	3.01506
RB2-5a		2	198	189.289
rho-3c		11	67	6.85925
snR10b		1	8	5.65323
snR31a		142	22	-3.33023
snR5d		9	49	3.88295
snR62		51	3	-2.2344
Tca13-6		0	8	5.55615
Tca9-R		455	143	-2.76737
tD(GUC)7	tD(GUC)7	73	7	-4.0071
tE(UUC)1	tE(UUC)1	18	1	-44.3712
tE(UUC)5	tE(UUC)5	449	3	-30.324
tG(GCC)6	tG(GCC)6	6	18	3.59751
tH(GUG)3	tH(GUG)3	12	1	-4.42225
tL(AAG)1	tL(AAG)1	0	5	20.4458
tP(UGG)1	tP(UGG)1	0	11	16.8184
tY(GUA)2	tY(GUA)2	18	2	-5.415
zeta-6a		2	6	3.95726
zeta-Rb		1	6	10.8825
Zorro2-1		1	4	3.41143
