# Supplementary material for: The Absence of N-Acetyl-D-glucosamine Causes Attenuation of Virulence of Candida albicans upon Interaction with Vaginal Epithelial Cells In Vitro
Source: Biomed Res Int. 2015 Aug 20;2015:398045. doi: 10.1155/2015/398045 (PMC4558442; doi:10.1155/2015/398045)
Supplement: Supplementary file 1 — RNA seq data was analyzed and differentially expressed genes between the C.a.3h vs. C.a.0h, PK+C.a.3h vs. C.a.0h and PK+C.a.3h vs. C.a.3h samples were listed. Since the hyphal form of C. albicans is pathogenic, genes with altered expression upon hyphal growth were collected. Our gene expression analysis revealed that the expression of genes involved in the glyoxylate cycle and fatty acid beta-oxidation in C. albicans were upregulated. [file 398045.f1.zip › sup/BMRI Manczinger et al Table S2.xls]

## Sheet: Both, no difference between hyp
ORF name	Gene symbol	Read count			Fold change of expression
		0ca	3ca	3PKCa	3hCa/0hca	3hpkca/0hca
orf19.1035	WAR1	16	68	40	3.12275	2.50733
orf19.1075.1		7	55	31	4.37582	4.85049
orf19.1086		31	85	60	2.70214	9.913
orf19.1093	FLO8	34	116	70	2.78764	4.213
orf19.1139		36	141	113	3.19311	4.27549
orf19.1150		7	25	12	2.52583	2.32823
orf19.1152		8	0	0	-10.6298	-4.23067
orf19.118	FAD2	33	145	104	2.9094	5.65428
orf19.1192	DNA2	11	33	29	2.42692	2.81328
orf19.1217		12	46	37	3.07544	4.30371
orf19.1219		3	20	13	2.39134	2.74131
orf19.1229		19	69	55	3.01764	4.91933
orf19.1259		26	143	95	3.30944	3.64906
orf19.1275	GAT1	5	35	16	4.70676	4.9475
orf19.1281		0	9	8	11.7323	18.2835
orf19.1333	SNG3	11	45	33	3.26532	6.75188
orf19.1368		44	19	7	-2.50231	-2.67812
orf19.1397		3	13	7	3.82424	8.73088
orf19.1461		1	19	16	34.8594	20.3721
orf19.1486		12	28	19	2.01395	2.53718
orf19.1492	PRP39	0	16	16	22.9455	38.4159
orf19.1494	RAD23	13	36	21	3.40092	5.3663
orf19.1519		12	35	24	3.33822	2.78376
orf19.1523	FMO1	8	71	41	7.35431	6.20863
orf19.1536		8	49	40	4.57305	7.47857
orf19.1555	SAC3	31	60	55	2.13096	3.15163
orf19.158		9	71	44	3.60361	5.43255
orf19.1604		15	52	28	3.53007	3.34051
orf19.1646		4	43	40	5.40542	8.05181
orf19.1662		1	16	8	19.4154	29.1029
orf19.1663	MNT2	8	34	19	3.6319	5.41762
orf19.1666		3	51	41	6.33808	16.1918
orf19.1667		13	38	31	2.68958	4.43473
orf19.1734		55	113	95	2.01909	3.12195
orf19.1751	SPT23	46	129	90	2.96624	2.89413
orf19.1759	PHO23	6	29	29	4.85385	6.11162
orf19.1765		0	7	10	6.83951	35.5056
orf19.1766		1	15	6	3.41976	3.78338
orf19.1785		13	3	3	-5.66561	-3.57925
orf19.1802		9	73	67	7.94266	10.9004
orf19.1806		11	41	35	3.25428	6.25713
orf19.1816	ALS3	300	1835	1295	5.34618	5.11688
orf19.1849		15	33	27	2.90495	3.49235
orf19.1856		2	23	10	4.55967	4.65647
orf19.1862		9	0	0	-13.5975	-12.0263
orf19.1864		16	36	29	2.29919	2.57331
orf19.1887		1	11	9	16.7678	7.56676
orf19.1901	MCM3	2	28	24	6.97991	8.88962
orf19.1923	RRN3	0	23	19	8.33489	10.3477
orf19.1956		8	44	31	4.71007	3.19151
orf19.1963	GDS1	41	235	138	4.78848	3.64326
orf19.2012	NOT3	17	36	28	3.08881	2.82075
orf19.202	CDC47	6	35	26	3.80586	5.67507
orf19.2051		2	59	36	38.3895	33.7594
orf19.2054	FGR15	3	16	10	2.52988	2.32823
orf19.2059		10	26	26	3.15185	4.98907
orf19.207	PGA55	33	138	108	3.96002	4.26843
orf19.2198	FLC3	16	78	62	4.2655	4.65647
orf19.2199	PHO86	2	13	15	2.08372	3.91273
orf19.220	PIR1	182	69	46	-2.88676	-2.37712
orf19.2250	SPE3	20	46	27	3.18337	2.03721
orf19.2266		6	23	20	2.11804	2.56106
orf19.2270	SMF12	25	71	63	2.96352	2.85999
orf19.2272	AFT2	15	50	45	4.29748	4.85892
orf19.23	RTA3	4	32	18	5.07448	6.40265
orf19.2309	PET127	11	85	56	5.41278	4.73408
orf19.2326		1	9	7	2.12842	3.90322
orf19.2333		14	41	19	3.26532	4.38484
orf19.2363		0	6	5	34.4182	71.0112
orf19.2379	NOT4	0	15	11	10.5902	14.7455
orf19.2382		4	44	29	3.90166	5.20789
orf19.2407	DPS1-1	17	45	37	2.07856	4.35012
orf19.2410	SYS3	11	29	29	2.74211	3.74181
orf19.2422	ARC1	2	23	10	3.77718	3.35266
orf19.2440		2	13	14	3.38298	5.23853
orf19.2452		8	41	31	5.29511	6.35787
orf19.2457		5	27	11	2.56732	2.06366
orf19.2473		5	17	12	2.64755	3.85997
orf19.2563		13	40	34	2.64755	2.68642
orf19.2611	MCM6	4	23	14	2.70639	3.80278
orf19.2660	EAF3	1	16	17	11.914	27.3568
orf19.2671		1	10	5	3.2359	2.52225
orf19.2675		14	36	26	3.89779	3.58936
orf19.2680		27	101	65	3.01527	2.68394
orf19.2682		14	38	20	2.7316	2.49454
orf19.2684		3	30	29	3.97133	5.937
orf19.2688	NAN1	5	94	68	10.2813	11.2337
orf19.2726		2	11	10	4.1719	5.92642
orf19.273		11	43	38	2.75787	3.9289
orf19.2762	AHP1	6	0	0	-5.6184	-17.0372
orf19.2771	BEM3	14	63	51	3.37878	14.6679
orf19.2778		19	66	48	3.14538	5.67134
orf19.2839	CIRT4B	25	6	6	-4.15478	-2.83477
orf19.2842	GZF3	18	62	36	2.97043	2.27145
orf19.2891		4	24	12	4.23608	8.76968
orf19.2930		6	101	62	9.04581	8.53686
orf19.2933		1	8	6	4.11842	3.49235
orf19.2935	RPL1	24	80	59	2.53143	3.36981
orf19.2959.1		60	15	10	-3.15655	-3.72242
orf19.2969	RAD16	32	89	55	2.14057	2.10532
orf19.2971		6	30	27	2.83666	3.65865
orf19.2989	GOR1	14	38	29	2.54165	2.42136
orf19.3015	ARX1	8	202	149	10.0439	11.1977
orf19.3051		5	22	9	3.81629	2.108
orf19.313	DAL4	0	9	6	18.5329	25.6106
orf19.3141		23	60	34	2.81174	5.87473
orf19.3170		9	71	60	2.80595	3.5819
orf19.3171	ACH1	228	689	439	2.89357	2.38183
orf19.3188	TAC1	15	63	48	3.17706	3.72518
orf19.3193	FCR3	11	52	38	2.98698	4.16396
orf19.3230	BOI2	17	132	96	7.29238	8.76152
orf19.3249	LAG1	5	40	23	11.3624	10.0405
orf19.3254		0	23	20	14.1203	32.5953
orf19.3256	SLN1	40	127	93	2.20025	2.77475
orf19.3330	CRL1	2	26	23	10.5902	16.2976
orf19.3334	RPS21	46	111	86	2.28587	2.60813
orf19.334		10	53	41	3.12893	5.66184
orf19.3340	SOD2	26	69	43	2.43183	2.37997
orf19.3344	VPS17	1	13	4	6.17762	8.14882
orf19.3352		3	14	16	3.7507	7.56676
orf19.3359	ARP8	22	64	50	2.38012	6.94943
orf19.339	NDE1	55	351	259	5.38051	5.74548
orf19.3391	ADK1	8	0	0	-4.30586	-2.22564
orf19.3423	TIF3	6	171	144	11.9581	16.123
orf19.3437		1	10	6	4.70676	6.01461
orf19.3449		12	45	36	3.58891	5.35494
orf19.347	RSN1	76	17	13	-5.17295	-2.00438
orf19.3477		5	31	20	6.94247	7.45035
orf19.3480		0	7	6	7.61172	41.6172
orf19.3501		10	67	61	3.93456	6.45115
orf19.3526	ITR1	9	37	21	2.48996	3.20132
orf19.356	GTT13	1	10	10	3.30944	6.9847
orf19.3575	CDC19	327	88	59	-3.27346	-2.59441
orf19.3608	MSH3	9	40	30	3.45947	5.68089
orf19.3635		40	136	109	2.85242	8.523
orf19.3653	FAT1	15	71	41	3.4231	4.65647
orf19.3664	HSP31	34	5	5	-4.59914	-2.19527
orf19.367	CNH1	17	47	30	2.39209	2.32823
orf19.3680	SEP7	18	64	36	3.26148	5.26384
orf19.3695		15	50	30	3.20392	3.74542
orf19.3704		0	7	7	51.186	52.3853
orf19.3706		7	26	26	3.85099	6.9847
orf19.3734	GEF2	44	103	66	2.4041	3.17122
orf19.3740	PGA23	20	1	2	-19.8296	-5.01095
orf19.3744		6	23	23	2.96847	5.18561
orf19.3751		66	229	187	3.01148	4.15242
orf19.3774	PPG1	0	8	5	5.73636	19.499
orf19.3792		32	79	59	2.05016	2.14914
orf19.3802	PMT6	12	39	28	2.47105	2.48345
orf19.3809	BAS1	4	29	28	6.1335	7.68317
orf19.3823	ZDS1	38	249	183	5.31176	6.65524
orf19.3839	SAP1	1	20	12	3.74019	6.79068
orf19.3840		70	209	130	2.42179	2.4636
orf19.3851		2	12	8	2.94173	3.68637
orf19.3865	RFX1	10	52	28	4.17725	4.42365
orf19.3867	RPL7	6	113	76	16.7678	18.127
orf19.3876	ZCF19	0	6	6	3.08881	12.2232
orf19.3895	CHT2	74	18	10	-2.46409	-3.46134
orf19.3912	GLN3	19	60	33	3.03365	2.43737
orf19.3944	GRR1	35	112	82	2.59407	2.96321
orf19.395	ENO1	1448	535	380	-3.01658	-2.87792
orf19.3952	SRP11	11	37	26	3.20493	4.5952
orf19.3981	MAL31	56	20	13	-2.20499	-3.25523
orf19.4000	GRF1	13	43	29	3.10646	2.84045
orf19.401	TCP1	16	55	47	2.40529	2.51084
orf19.407	GCD6	20	96	84	4.09488	5.33166
orf19.4077	MIT1	11	56	53	4.80972	8.09062
orf19.4093	PES1	4	55	32	10.4799	12.4173
orf19.411		123	29	25	-4.57781	-2.34489
orf19.4110		14	42	30	3.2359	3.63787
orf19.412	SSH1	4	25	20	8.62906	7.63144
orf19.4136	YBL53	1	12	11	9.11935	14.7455
orf19.4160		0	10	12	26.0343	45.4006
orf19.4166	ZCF21	6	43	25	3.29783	4.5952
orf19.4265	UAP1	2	26	11	7.67112	26.1479
orf19.4268	UTP13	0	71	65	26.5858	45.9826
orf19.4318	MIG1	26	76	44	2.59407	3.98622
orf19.4322	DAP2	37	100	79	2.26716	3.21136
orf19.4354	MCM2	9	38	31	3.53007	3.99126
orf19.4369		21	56	46	2.00037	2.74214
orf19.4370		5	19	12	2.70639	2.09541
orf19.4377	KRE1	6	30	30	2.072	3.59358
orf19.4390		4	21	8	2.5593	3.37594
orf19.440	SDH1	3	17	19	2.01132	2.4636
orf19.4409		2	20	13	3.27792	2.57769
orf19.4426	PEX3	1	16	16	2.82406	2.85209
orf19.4433	CPH1	6	33	19	5.54725	7.31731
orf19.4437		15	40	28	2.87635	4.7427
orf19.4446		9	26	28	2.46176	3.98251
orf19.4448	SOG2	17	54	52	2.52148	6.73525
orf19.4450	ZCF23	12	60	56	3.53007	5.82059
orf19.4492		0	11	11	9.48707	25.0285
orf19.4502		71	193	136	2.72289	3.20842
orf19.4513		13	110	95	4.041	11.1204
orf19.4516		3	13	16	6.94983	11.2046
orf19.4531		53	171	133	2.81786	3.2677
orf19.4549	FGR38	3	16	10	2.05921	2.97497
orf19.4590	RFX2	27	65	37	2.08791	2.55538
orf19.4627		12	58	44	3.06286	4.00593
orf19.4662	RLM1	15	52	45	2.20629	4.68293
orf19.4670	CAS5	7	54	38	6.13118	6.9847
orf19.4682	HGT17	202	32	23	-5.73643	-3.23631
orf19.4699		7	23	22	2.72778	2.59281
orf19.4744		5	22	11	2.86818	2.25548
orf19.4760		4	48	43	5.25981	7.86943
orf19.4786	FGR43	11	1	2	-5.66561	-2.57706
orf19.4798		53	93	81	2.23652	3.34883
orf19.4818		4	19	9	6.94983	5.09301
orf19.4866	CPP1	9	29	22	3.17053	2.41447
orf19.4880		0	11	11	11.8257	20.0228
orf19.4890	CLA4	18	151	123	5.00829	11.5539
orf19.4927	BNI1	71	168	141	2.41363	2.93133
orf19.4929		2	43	42	7.44177	5.91497
orf19.4932		5	139	100	7.87962	21.0996
orf19.4933	FAD3	4	101	66	12.0837	15.4917
orf19.4941	TYE7	46	25	12	-2.53603	-2.07046
orf19.4988		0	7	10	3.78222	5.48798
orf19.4991	MPT5	22	115	66	4.48047	4.71617
orf19.4997	KIS2	37	99	57	2.59712	3.75844
orf19.5000	CYB2	431	168	111	-2.89228	-3.22656
orf19.5001	CUP2	3	34	21	4.02649	3.63787
orf19.501		2	30	29	14.7822	20.9541
orf19.5029	MODF	0	18	16	37.0657	48.8929
orf19.5032	SIM1	22	149	100	5.51035	8.6599
orf19.5050	MTO1	0	9	7	3.71918	6.15319
orf19.5056		131	0	2	-19.786	-7.22213
orf19.506	YDJ1	6	46	36	3.84014	12.8682
orf19.5064	MRPL3	2	14	17	4.27139	7.47363
orf19.5105	MED15	28	84	47	2.16759	4.28885
orf19.5125		143	32	17	-3.60333	-3.33132
orf19.5126		4	82	67	9.70769	22.8167
orf19.5167	IFM1	3	50	48	5.58928	9.91656
orf19.5169		4	20	14	4.93264	6.25713
orf19.5198	NOP4	6	107	70	7.68117	10.3908
orf19.52		5	58	39	3.65614	9.92272
orf19.5213		15	50	38	2.68767	2.78683
orf19.5251	ZCF3	11	29	30	2.79884	3.09323
orf19.5280	MUP1	14	345	239	16.5325	18.4319
orf19.529		5	29	28	4.85385	7.13022
orf19.5300		10	30	29	3.45333	11.4893
orf19.5311		2	22	12	8.08975	7.76078
orf19.5335	SGS1	13	45	22	2.7679	2.91029
orf19.5340		1	9	8	3.21138	5.94993
orf19.5348	TPS3	136	47	33	-3.46029	-2.62324
orf19.5377	HOS2	0	7	6	9.70769	38.8039
orf19.5391		5	74	46	7.67112	11.0143
orf19.542	HXK2	406	44	43	-8.0287	-4.39585
orf19.5425		0	13	8	12.1787	12.8053
orf19.5447	HGT19	83	15	5	-3.84805	-6.29948
orf19.5495		17	145	98	5.32185	6.13807
orf19.5496	AVT1	4	18	12	2.84367	2.97497
orf19.5508		0	16	8	15.8853	14.5515
orf19.5525		12	1	1	-12.4643	-29.6975
orf19.5537	WSC2	16	39	21	2.14326	2.77171
orf19.5555		8	39	38	2.74561	5.23853
orf19.5561	STE23	26	88	66	3.44984	4.58592
orf19.5566		1	12	14	7.94266	18.6259
orf19.5580	TEL1	66	195	144	2.54165	2.65419
orf19.5597	POL5	11	47	38	3.79483	4.03561
orf19.56	ARG2	2	11	11	3.08881	8.58537
orf19.5602	BMT6	7	27	23	2.28652	2.32823
orf19.5607		0	9	6	30.4469	24.4465
orf19.5627		20	53	46	2.05921	6.40265
orf19.5667	MNR2	11	56	40	2.73365	3.03806
orf19.5677	DUR4	2	15	15	9.70769	11.6412
orf19.5704		2	52	34	14.2464	13.4705
orf19.5705	NAM2	11	44	33	3.00056	3.58548
orf19.5736	ALS5	17	92	67	5.62024	6.92344
orf19.5752		13	39	28	2.4871	3.59818
orf19.5755		0	9	8	30.0056	67.5188
orf19.5801	RNR21	14	59	41	3.97133	10.9533
orf19.5805	DLD1	110	47	40	-2.67093	-2.05418
orf19.5834		33	95	81	3.09714	3.86575
orf19.5843	SRR1	5	25	10	2.94173	2.32823
orf19.5845	RNR3	5	38	37	7.42786	10.283
orf19.5850	NOC2	4	83	46	16.0508	16.6614
orf19.5864	URK1	2	10	12	2.64755	5.04451
orf19.5884		7	70	53	5.52735	4.90155
orf19.5906	ADE2	20	58	47	3.34904	3.28341
orf19.5919	MEA1	3	23	15	7.1582	8.14882
orf19.593	FGR32	4	16	17	3.63704	3.52763
orf19.5935		4	15	10	3.19913	2.76478
orf19.5953		16	55	38	3.16489	3.45221
orf19.5987		2	12	7	3.2359	5.23853
orf19.600	TRK1	18	60	54	3.5516	4.5429
orf19.6007		14	51	39	3.05487	3.67145
orf19.6011	SIN3	83	187	145	2.15809	2.16193
orf19.6020		1	12	12	11.0315	16.2976
orf19.6023		6	26	22	3.79483	5.82059
orf19.6032	SPE1	18	65	45	3.89525	4.53604
orf19.6037	ASM3	7	43	42	4.7656	7.21753
orf19.604		1	12	12	11.4727	12.4173
orf19.6041	RPO41	37	307	206	6.0615	5.59083
orf19.6054		18	54	47	2.94173	3.29833
orf19.6068	SVF1	6	45	44	5.39316	7.11405
orf19.6090		21	140	82	7.99169	8.43985
orf19.6116	GLK4	14	3	0	-12.7258	-8.95835
orf19.6133	PIF1	7	41	28	3.48805	6.20863
orf19.6141	HGT16	17	60	55	3.02093	4.4326
orf19.6192		1	14	12	11.0315	11.0591
orf19.6227		0	10	7	4.45785	2.23869
orf19.6242	CYK3	47	19	10	-4.13041	-2.69637
orf19.6244		17	45	28	2.71292	2.45758
orf19.6259		2	15	9	2.64755	2.91029
orf19.6268		7	32	28	2.14326	5.87602
orf19.6275		3	31	15	7.06014	6.79068
orf19.6287	AAT21	20	57	35	2.97938	2.12335
orf19.6306		12	111	68	3.47964	7.71644
orf19.6338		9	2	1	-14.7306	-5.58363
orf19.6362	SPA2	67	178	135	2.44531	2.31611
orf19.6415.1		13	61	54	2.78217	2.63406
orf19.6487		26	4	1	-3.96593	-6.01314
orf19.6489	FMP45	25	7	2	-3.53011	-3.02524
orf19.6494	WHI3	9	33	21	2.249	5.82059
orf19.6511	LIG1	7	60	55	7.62174	13.8636
orf19.6557		15	39	27	2.86818	3.20132
orf19.6558		2	29	30	4.90288	10.6064
orf19.6563		2	19	18	5.44219	14.7455
orf19.6569		4	14	16	3.2359	6.59667
orf19.6653	MTG2	2	50	34	12.8595	18.7922
orf19.6660		2	48	30	15.8853	16.2976
orf19.6665		29	87	52	2.73885	3.35186
orf19.6749	KRS1	5	26	18	4.74955	10.2231
orf19.6760	MDS3	34	106	83	2.64755	3.03683
orf19.6763	SLK19	1146	412	261	-2.92034	-3.2277
orf19.6800	POS5	7	23	16	3.29473	2.48345
orf19.6805		7	27	29	2.60918	3.54297
orf19.6840		0	18	10	9.8842	13.5038
orf19.685	YHM1	13	73	58	4.48613	5.23853
orf19.6855		9	35	35	3.80161	5.64149
orf19.6871		13	98	56	6.74866	6.57384
orf19.6902	DBP7	4	26	24	5.84668	6.54816
orf19.6928	SAP9	538	177	132	-3.13253	-4.04495
orf19.6948	CCC1	4	28	25	4.80482	6.72601
orf19.6952		5	18	21	3.21489	6.8184
orf19.6955	HBR3	0	17	12	79.4266	64.0265
orf19.6983		20	98	63	2.40529	2.69345
orf19.6984		6	51	46	5.85671	7.93716
orf19.6992		12	39	19	2.6815	2.01482
orf19.6993	GAP2	246	678	503	2.6119	2.61045
orf19.702		5	48	36	5.5738	6.55582
orf19.7036		0	12	13	10.296	41.9082
orf19.7041		6	52	38	8.11916	12.9217
orf19.7046	MET28	18	63	59	3.28297	5.49463
orf19.7085		50	8	6	-9.63154	-7.73118
orf19.7089	PMR1	12	72	63	3.30944	3.91273
orf19.7149		32	75	40	2.04669	2.40254
orf19.7203	MRP7	2	43	39	6.61888	13.4601
orf19.723	BCR1	29	116	71	3.35787	3.32199
orf19.73		31	79	58	2.21462	2.9652
orf19.7305		5	0	0	-7.36529	-3.72242
orf19.7323	CBP1	45	90	73	2.25252	2.06215
orf19.736	SRB8	23	99	81	3.13784	4.62413
orf19.7367	UBP1	7	53	46	3.95368	8.94042
orf19.7394	GDA1	3	86	50	35.0801	34.9235
orf19.7412	MUB1	8	28	22	2.40045	5.26181
orf19.7478		3	39	33	6.6504	8.02409
orf19.7488		3	20	10	3.53007	4.90155
orf19.7489		31	98	76	2.8067	4.59922
orf19.7497		11	40	35	3.48594	7.85779
orf19.7549	PMT5	0	21	24	18.0916	38.4159
orf19.756	SAP7	3	24	10	4.53866	3.49235
orf19.7569	SIK1	3	23	16	53.272	15.1864
orf19.7593		5	27	28	4.81373	10.3183
orf19.7599	UTP5	2	13	13	3.17155	6.58454
orf19.7619		11	35	28	2.91615	3.64419
orf19.7624		2	36	22	3.4653	15.5233
orf19.7635	DRS1	11	131	112	10.3866	11.4621
orf19.764		3	30	29	3.29473	4.26843
orf19.768	SYG1	4	32	25	5.29511	6.11162
orf19.780	DUR1,2	21	252	171	8.73693	8.03241
orf19.808		10	41	37	3.73772	4.93038
orf19.809		6	55	49	6.39825	10.186
orf19.846		152	49	28	-3.27472	-2.14014
orf19.880		13	59	30	3.22458	3.98486
orf19.89	PEX7	9	36	24	3.28938	3.06904
orf19.896	CHK1	31	104	92	2.46849	2.73315
orf19.918	CDR11	874	378	256	-2.57834	-2.67932
orf19.920	RMT2	3	12	10	5.67333	10.6434
orf19.935	AGA1	0	12	7	5.58928	8.9249
orf19.943	FET33	1	12	10	8.82518	13.9694
orf19.985		19	57	49	2.75787	5.86909
orf19.996		4	17	12	2.13275	2.71627
xi-Ra		1	8	10	5.73636	29.3358

## Sheet: Both, difference between hyphae
ORF name	Gene symbol	Read count			Fold change of expression
		0ca	3ca	3PKCa	3hCa/0hca	3hpkca/0hca	3hpkca/3hca
orf19.1030		5	118	259	16.6502	40.1232	2.40978
orf19.1031	HMG1	24	85	89	3.04469	6.14072	2.01686
orf19.1033	STR2	29	83	136	2.16279	6.41084	2.96415
orf19.1047	ERB1	4	72	184	4.36846	30.4805	6.97739
orf19.1065	SSA2	104	316	1158	2.59495	10.8934	4.1979
orf19.1077	ATM1	12	63	115	3.83556	13.1635	3.43196
orf19.1105.2	PGA56	6	45	66	5.25833	12.0615	2.2938
orf19.113	CIP1	5	43	50	8.82518	26.7747	3.0339
orf19.1195		19	99	184	4.4527	11.6941	2.62629
orf19.1223	DBF2	60	28	145	-2.1596	3.14743	6.79718
orf19.1232	VRG4	8	78	125	2.64755	8.78631	3.31865
orf19.1233	ADE4	15	181	461	10.1749	35.6083	3.49962
orf19.1235	HOM3	6	44	134	5.81423	22.1182	3.80415
orf19.1264	CFL2	7	56	510	6.37374	69.847	10.9586
orf19.1272		6	23	45	4.9421	10.3606	2.09641
orf19.1287		10	37	180	3.42625	22.7345	6.63541
orf19.1295	VAS1	61	334	1241	3.58675	17.5472	4.89223
orf19.1325	ECM38	9	88	116	9.74447	23.1368	2.37436
orf19.1327	RBT1	10	51	262	4.14104	25.3419	6.1197
orf19.1342	SHM1	0	12	31	9.47545	19.8513	2.09502
orf19.1357	FCY21	29	84	188	2.52789	11.5425	4.56607
orf19.1358	GCN4	67	593	1323	7.17913	23.8186	3.31776
orf19.136		5	35	77	5.95699	19.2079	3.22443
orf19.1362	SMM1	3	21	39	9.32947	24.7791	2.656
orf19.1363		43	119	211	2.18561	6.52997	2.98771
orf19.1394		6	52	142	6.7292	27.5023	4.08701
orf19.1401	EAP1	22	317	2363	11.9875	78.966	6.58734
orf19.1415	FRE1	3	20	113	3.19913	14.5515	4.54858
orf19.1416	COX11	0	7	14	5.1186	26.7747	5.23086
orf19.1441		15	108	145	5.87628	14.736	2.50771
orf19.1447		0	6	11	3.90829	8.14882	2.08501
orf19.1499	CTF1	20	71	84	2.11471	4.76629	2.25387
orf19.1509	ROD1	17	61	118	3.03126	7.79453	2.57138
orf19.1517	ARO3	4	47	107	8.82518	37.8338	4.28703
orf19.1531		16	39	89	2.51178	7.65631	3.04816
orf19.1542	HEX3	26	118	181	3.9125	9.23533	2.36047
orf19.1576		5	21	42	3.86627	9.92272	2.56648
orf19.1578		25	471	749	16.7946	34.2533	2.03954
orf19.1609		2	23	78	11.963	33.8888	2.83279
orf19.1613	ILV2	41	334	1021	7.49417	35.6678	4.75941
orf19.1616	FGR23	3	17	42	4.41259	22.7003	5.14444
orf19.1617		15	200	51	10.5412	4.13908	-2.54674
orf19.164		3	17	34	2.42692	6.9847	2.87801
orf19.1656		8	52	54	4.07316	11.1039	2.72611
orf19.1659	ALG8	0	12	20	11.4727	25.6106	2.2323
orf19.1706	MET18	6	21	38	3.47816	8.35425	2.40192
orf19.1715	IRO1	23	54	90	2.50047	6.14395	2.45712
orf19.1718	ZCF8	4	30	55	3.53007	9.31294	2.63817
orf19.1725		3	14	26	6.17762	16.2976	2.63817
orf19.1742	HEM3	7	93	183	6.22407	15.0723	2.42161
orf19.1743	ACS1	497	2247	681	4.42689	2.16566	-2.04413
orf19.1755	SET2	3	38	39	12.6074	30.1008	2.38755
orf19.1756	GPD1	0	68	93	41.6548	108.03	2.59346
orf19.1770	CYC1	24	75	38	2.27418	5.76835	2.53645
orf19.1783	YOR1	51	237	585	2.01341	7.0335	3.49333
orf19.1798	TSC2	22	48	83	2.70104	7.76078	2.87326
orf19.1815		7	75	257	9.19289	50.057	5.44519
orf19.182		3	15	28	4.29748	13.3114	3.0975
orf19.1822	UME6	6	90	159	18.2387	45.2066	2.47861
orf19.1832	FCY23	7	51	241	2.83666	14.0941	4.96856
orf19.1833		11	85	178	3.45443	10.2442	2.96554
orf19.1854	HHF22	140	9	74	-8.7712	4.38911	38.4978
orf19.1855		4	18	53	2.07651	6.77927	3.26474
orf19.1871		43	121	117	2.46586	6.00319	2.43453
orf19.188		8	27	71	2.64755	6.56562	2.47988
orf19.1902	NOC4	5	26	53	2.98975	6.58083	2.20113
orf19.1961		7	45	80	3.69554	13.8967	3.76038
orf19.1964		12	35	59	3.06286	7.36133	2.40342
orf19.198	ASN1	30	297	1060	7.78381	35.3892	4.54651
orf19.2000		1	12	21	7.28077	22.9913	3.15781
orf19.2023	HGT7	372	109	789	-3.81228	2.4338	9.27832
orf19.2063		10	53	82	3.0487	6.31446	2.0712
orf19.2097		12	36	42	2.73885	6.82414	2.49161
orf19.2098	ARO8	21	73	100	3.85226	11.7336	3.04589
orf19.2138	ILS1	137	351	659	2.44094	6.74721	2.76418
orf19.2183	KRE3	14	254	582	11.1708	24.3546	2.1802
orf19.2232	RPL11	58	152	322	2.30593	5.90508	2.56082
orf19.2238	LTE1	10	35	93	2.2189	7.05123	3.1778
orf19.231	APL2	6	19	59	3.65614	11.0591	3.0248
orf19.2319		6	93	110	3.68074	8.29079	2.25248
orf19.2344	ASR1	68	28	4	-3.4424	-17.1804	-4.99083
orf19.2360	URA2	103	705	1280	5.01705	14.4957	2.88928
orf19.2364	MIS11	101	391	782	2.898	7.48024	2.58118
orf19.2398		28	0	8	-35.6933	-2.16473	16.4886
orf19.2417	SMC5	9	25	76	2.09017	8.94532	4.2797
orf19.2443	RGD1	5	18	28	2.35338	9.24827	3.92978
orf19.2444	CHS7	1	11	18	3.82424	13.7754	3.60212
orf19.2455		12	53	87	4.72407	12.189	2.58019
orf19.2495	GSL1	7	21	40	2.05921	7.27573	3.53327
orf19.2504	BMS1	23	182	359	9.59003	23.4376	2.44395
orf19.2538	PTC2	28	181	228	3.63513	16.4224	4.51768
orf19.2560	CDC6	121	375	1027	2.93974	10.5636	3.59337
orf19.2608	ADH5	107	30	4	-4.15988	-13.2095	-3.17544
orf19.2616	UGT51C1	18	72	147	2.82925	11.7097	4.13879
orf19.2631		0	9	21	43.2434	87.3088	2.01901
orf19.2633	HGT14	3	27	122	5.88345	39.3213	6.68337
orf19.2647	ZCF14	1	8	16	3.78222	16.1313	4.26505
orf19.265		3	18	46	6.39825	39.871	6.23155
orf19.2672	NCP1	34	159	265	3.38298	8.14882	2.40877
orf19.2694	TYS1	3	35	56	5.18479	14.3574	2.76915
orf19.2725		1	10	20	3.97133	9.895	2.49161
orf19.2738	SUL2	4	17	83	2.78332	16.7454	6.01632
orf19.2746	EMP7	21	51	99	2.31661	6.9847	3.01506
orf19.2760		19	93	137	2.7211	6.07928	2.23413
orf19.2782		2	24	42	3.32641	13.9694	4.19954
orf19.2818		0	20	47	6.08937	16.0648	2.63817
orf19.2823	RFG1	61	247	2522	4.27324	40.836	9.55621
orf19.2827		4	15	480	3.38298	44.9479	13.2865
orf19.2830	RRP9	1	10	54	24.887	72.1753	2.90012
orf19.2843	RHO1	25	60	153	3.02309	9.48632	3.13795
orf19.2847		4	19	42	3.404	12.5558	3.68856
orf19.2849	AQY1	33	7	17	-3.88499	2.4495	9.51627
orf19.288	MET13	24	65	185	2.43854	8.91469	3.65575
orf19.2882	XUT1	1	35	92	10.7373	36.0876	3.36096
orf19.2886	CEK1	15	71	78	2.32887	6.41881	2.7562
orf19.2892		31	104	172	3.26532	6.9265	2.12123
orf19.2898		6	26	70	3.45653	12.4173	3.59241
orf19.2927	MNN11	1	11	47	12.6494	114.86	9.08023
orf19.2947	SNZ1	13	102	147	6.5005	19.3215	2.97231
orf19.2960	FRS2	22	91	206	4.05053	11.9994	2.96242
orf19.2970	LYS2	59	416	1267	5.44726	25.1423	4.61558
orf19.2972	PDE2	23	45	96	2.00849	5.49945	2.7381
orf19.2991	HOL1	5	20	35	4.85385	14.7334	3.0354
orf19.30	SPF1	64	142	217	2.10993	4.70999	2.2323
orf19.300	AIP2	33	163	301	3.73373	8.3503	2.23645
orf19.3003.1	RPL6	72	194	354	2.67162	5.68301	2.12718
orf19.3012	ARO8	6	24	43	4.5229	10.9136	2.41296
orf19.3126	CCT6	36	118	202	3.0982	6.61318	2.13452
orf19.3133	GUT2	68	190	540	3.08881	12.5936	4.07718
orf19.3159	UTP2	22	231	368	6.84489	14.1966	2.07404
orf19.3180		2	12	44	9.70769	34.1827	3.5212
orf19.3214		38	88	527	2.02824	14.7251	7.26001
orf19.3216		16	55	67	3.03586	8.94042	2.94494
orf19.3219		4	60	68	7.00498	21.0269	3.0017
orf19.3222		7	36	51	2.4871	6.45556	2.59562
orf19.3226		2	13	22	2.75787	9.02191	3.27134
orf19.3228		3	14	33	4.41259	9.77859	2.21607
orf19.3232		81	3	12	-32.1051	-3.04236	10.5527
orf19.3252	DAL81	3	19	35	2.83666	10.6434	3.75207
orf19.3264.1		49	124	524	2.01444	10.2493	5.08791
orf19.3265	TRM1	1	35	62	28.2406	62.2803	2.20535
orf19.3301		26	115	136	3.3943	7.70108	2.26883
orf19.3305	ZCF17	4	30	37	4.58909	12.1068	2.63817
orf19.3331	ABC1	14	88	171	8.56561	17.3933	2.03059
orf19.3345	SIZ1	27	87	87	2.48018	6.66357	2.68673
orf19.3363	VTC4	66	146	233	2.14874	4.98546	2.32018
orf19.3406		1	21	39	5.88345	13.7754	2.34138
orf19.3419	MAE1	13	101	200	6.7292	16.2976	2.42193
orf19.3432		4	29	42	3.86101	8.43985	2.18592
orf19.3438		1	17	61	3.08881	15.5216	5.02509
orf19.3445	HOC1	4	17	37	5.05442	16.086	3.18256
orf19.3463		10	65	136	2.68668	6.5202	2.42686
orf19.3470		3	48	81	7.79557	17.3648	2.22751
orf19.3475		71	296	524	3.15059	9.33622	2.96333
orf19.3483		2	20	57	14.1203	66.9368	4.74047
orf19.3528		0	6	12	12.3552	33.7594	2.73239
orf19.3538	FRE9	1	9	13	19.4154	60.5341	3.11784
orf19.3552		14	54	56	4.63322	13.8239	2.98365
orf19.3564	RPC4	1	15	47	4.03437	9.47924	2.34962
orf19.3603	MFG1	6	34	44	3.41976	7.42125	2.17011
orf19.3618	YWP1	69	684	1642	7.48717	22.9819	3.06951
orf19.3624	MSU1	13	46	137	3.0678	9.64554	3.14412
orf19.3626		1	8	14	4.32434	10.4771	2.42281
orf19.3629	DSE1	73	24	78	-2.10761	2.31572	4.88062
orf19.3630	RRP8	3	38	114	6.73923	16.721	2.48114
orf19.3690.2		14	70	92	3.1211	6.95631	2.2288
orf19.3694		9	24	54	2.10824	6.01461	2.85291
orf19.3700	TOM7	14	72	171	2.59639	8.01385	3.08653
orf19.3708	SAP2	6	18	29	2.26933	7.64991	3.371
orf19.3710	YHB5	34	201	428	3.85937	9.05232	2.34554
orf19.3714		4	17	26	5.44219	19.0139	3.4938
orf19.3726		8	24	33	2.47945	4.98907	2.01217
orf19.3737		13	30	66	2.05921	4.80198	2.33196
orf19.3765	RAX2	27	152	153	3.19913	8.37749	2.61868
orf19.3782.2		9	30	59	2.00264	4.96989	2.48167
orf19.3799		20	86	201	2.42911	5.97042	2.45787
orf19.3825	RCE1	6	21	36	3.7507	8.29434	2.21141
orf19.3846	LYS4	29	131	196	3.38298	7.04938	2.08377
orf19.3854		25	81	100	2.34137	4.94156	2.11054
orf19.3869		1	13	34	10.5902	26.3867	2.49161
orf19.3874		1	11	18	5.58928	16.6857	2.9853
orf19.3902		19	57	182	3.06559	14.2145	4.63679
orf19.3914		6	52	92	6.32471	21.5362	3.40508
orf19.3931	SFC1	2	83	25	11.3158	5.07038	-2.23175
orf19.3955	MES1	53	145	453	2.79641	10.4771	3.74661
orf19.3991		1	17	23	9.83377	27.9388	2.84111
orf19.4040	ILV3	12	46	201	2.93307	15.493	5.28218
orf19.4060	ARO4	11	91	317	6.21518	19.0469	3.06459
orf19.4076	MET1	66	292	556	3.59796	9.01445	2.50544
orf19.4099	ECM17	108	767	1259	5.62948	13.7163	2.43652
orf19.4144		0	6	14	5.29511	14.3574	2.71146
orf19.4152	CEF3	531	1568	2356	2.41724	5.46851	2.2623
orf19.4175	TOK1	6	26	64	2.76143	6.08345	2.20301
orf19.4236	RET2	0	17	5	23.5338	10.4771	-2.24622
orf19.4261	TIF5	9	69	173	3.97133	10.0696	2.53558
orf19.4273		8	90	167	6.60254	14.8317	2.24637
orf19.428		3	12	17	2.12842	4.99886	2.34862
orf19.4282	IFH1	29	139	300	4.0665	10.1803	2.50346
orf19.4295		8	36	46	4.20247	11.9738	2.84923
orf19.4309	GRP2	60	200	414	3.02671	8.32128	2.74928
orf19.4326		3	37	60	8.64867	22.3511	2.58433
orf19.4328	CCC2	18	89	137	4.59645	11.4957	2.50099
orf19.4335	TNA1	9	65	355	4.4645	29.1714	6.53408
orf19.4337		3	26	124	3.53007	14.0058	3.96757
orf19.4348	MED14	19	45	55	2.49407	5.01077	2.00907
orf19.4435		16	35	73	3.34748	9.55379	2.85402
orf19.445		2	21	37	4.2655	12.4173	2.91109
orf19.4455		2	21	44	15.0028	39.58	2.63817
orf19.4457	BNI4	29	77	137	2.14326	5.98689	2.79336
orf19.4459		2	15	27	7.5014	25.0285	3.33651
orf19.4476		26	156	228	5.21237	10.8045	2.07285
orf19.4490	RPL17B	102	295	252	2.38536	20.1021	8.4273
orf19.4506	LYS22	16	222	1807	10.3896	101.543	9.77347
orf19.4519	SUV3	4	21	81	8.82518	32.8281	3.71982
orf19.4526	HSP3	24	0	9	-12.0394	-2.08619	5.771
orf19.4532		8	22	62	3.34096	9.22979	2.76262
orf19.4550		5	37	92	6.32471	29.491	4.66282
orf19.4635	NIP1	18	110	110	5.61029	11.8352	2.10955
orf19.4640	PWP1	1	28	43	10.9154	22.6697	2.07686
orf19.4643		34	95	141	2.43575	8.94042	3.6705
orf19.4649	ZCF27	10	62	83	3.48594	8.32344	2.38771
orf19.4650	ILV6	19	95	400	3.31613	16.3329	4.9253
orf19.4651	PGA53	2	36	161	6.4718	32.2072	4.97655
orf19.4653		0	24	270	5.5738	57.9608	10.3988
orf19.4698	PTC8	4	57	81	8.43295	18.2378	2.16269
orf19.4704	ARO1	112	261	935	2.17275	8.68663	3.99799
orf19.4718	TRP5	21	143	499	4.85385	17.5737	3.62057
orf19.473	TPO4	6	41	71	6.80799	17.1292	2.51604
orf19.4750		4	14	18	3.7507	8.73088	2.3278
orf19.4757	NAR1	6	24	67	3.68581	10.1347	2.74965
orf19.4771		8	59	81	5.07448	11.6412	2.29406
orf19.4779		12	45	50	2.20629	4.65647	2.11054
orf19.4788	ARG5,6	12	94	290	7.83234	33.5411	4.28239
orf19.4792		13	57	85	3.26532	7.50856	2.29949
orf19.4805		11	104	196	6.815	15.9096	2.3345
orf19.4808	NUP188	39	93	115	2.14823	6.47923	3.01607
orf19.4813	GUA1	13	80	94	7.01369	14.1839	2.02231
orf19.4874	MNN23	7	54	88	5.05442	11.8528	2.34504
orf19.4889		4	23	37	2.08022	7.89937	3.79737
orf19.4910	FGR41	19	7	62	-3.58822	3.82933	13.7405
orf19.4934	OP4	2	32	88	9.92832	34.0504	3.42963
orf19.4943	PSA2	39	26	7	-2.14852	-6.60089	-3.0723
orf19.4966	AGC1	13	149	256	7.77923	16.4701	2.11719
orf19.5004	RAD54	1	9	15	2.84367	6.07928	2.13783
orf19.5009		0	6	31	14.4145	53.9374	3.7419
orf19.5025	MET3	8	84	181	6.87435	29.4706	4.28703
orf19.5027	LCB2	13	55	77	4.09167	8.41339	2.05622
orf19.5061	ADE5,7	47	218	447	3.81859	11.0815	2.90199
orf19.5079	CDR4	391	170	48	-2.43936	-5.54784	-2.2743
orf19.5094	BUL1	18	65	232	2.89647	10.6263	3.66871
orf19.5097	CAT8	8	63	118	6.53063	18.5095	2.83425
orf19.51		46	303	459	5.36171	11.3337	2.11382
orf19.5100	MLT1	46	372	1535	5.71961	29.4271	5.14495
orf19.5121	OPT5	1	10	14	6.17762	15.1335	2.44973
orf19.5234	RBD1	16	36	47	2.94173	6.16551	2.09588
orf19.5292	AXL2	12	115	249	5.73636	19.887	3.46683
orf19.5307	JEN2	102	581	170	5.28991	2.38986	-2.21348
orf19.5312	MET4	7	46	53	5.29511	10.8651	2.05191
orf19.536		17	45	58	3.05204	6.45115	2.11372
orf19.5383	PMA1	1327	3175	7320	2.13684	6.43029	3.00925
orf19.5388	SWD1	9	2	18	-3.85261	2.1228	8.17834
orf19.541		2	21	35	3.93739	16.2081	4.11646
orf19.5480	ILV1	15	76	81	3.95611	13.7286	3.47021
orf19.5483		1	12	16	5.6585	26.9117	4.75597
orf19.5500	MAK16	0	10	25	13.9438	32.3625	2.32092
orf19.5505	HIS7	10	69	330	6.51237	31.1903	4.78939
orf19.5507	ENP1	4	39	65	5.56665	14.2381	2.55774
orf19.5517		2	22	36	8.19481	23.7813	2.90199
orf19.558	GUT1	2	10	40	4.83283	13.2488	2.74141
orf19.5595	SHE3	8	31	69	3.97133	10.1278	2.55023
orf19.5604	MDR1	5	275	763	40.7429	154.44	3.79059
orf19.5612	BMT4	8	28	67	2.15334	7.72974	3.58965
orf19.5619		2	17	29	8.82518	22.1182	2.50626
orf19.5623	ARP4	2	12	23	6.76597	66.7427	9.86448
orf19.5639	HIS4	48	300	1046	3.92145	16.7835	4.27993
orf19.5663	RCH1	0	33	58	10.51	28.2563	2.68852
orf19.568	SPE2	1	24	29	67.9539	146.679	2.15851
orf19.5746	ALA1	73	219	504	2.54115	7.89288	3.10603
orf19.5753	HGT1	165	419	575	2.08622	4.82673	2.31362
orf19.5754		7	62	83	6.00112	13.5038	2.25021
orf19.5785		3	12	27	2.64755	10.2442	3.86932
orf19.5877	ATF1	7	38	133	6.74496	26.3589	3.90795
orf19.5887	NUP85	0	25	49	5.24319	13.3531	2.54675
orf19.5959	NOP14	4	88	120	12.1787	30.3835	2.49479
orf19.5989		8	23	1	2.17872	-5.49773	-11.978
orf19.6091	RIM8	3	15	42	4.58909	21.6526	4.71827
orf19.6199		3	22	40	2.33608	5.4782	2.34504
orf19.6237	RAC1	9	46	96	2.55103	7.27573	2.85208
orf19.6243	VPS34	4	23	49	6.03054	15.1335	2.50948
orf19.6294	MYO1	27	74	259	2.70639	10.9427	4.04329
orf19.6317	ADE6	44	146	232	3.39524	7.58293	2.2334
orf19.6356		1	8	36	7.94266	21.1204	2.65911
orf19.6418		2	48	21	19.1948	9.02191	-2.12757
orf19.643		9	32	51	3.12893	6.9847	2.2323
orf19.6515	HSP9	431	1540	3038	2.92107	7.15888	2.45078
orf19.655	PHO84	52	1044	2498	4.66999	13.5329	2.89784
orf19.6556		8	84	125	5.4768	14.6199	2.66943
orf19.657	SAM2	123	328	644	2.4185	6.19382	2.56101
orf19.6573	BEM2	131	781	1113	4.36942	9.80642	2.24433
orf19.6577	FLU1	3	86	85	12.6494	30.6551	2.42344
orf19.6584	PRT1	10	143	218	5.92785	16.4075	2.76786
orf19.660		4	14	21	3.38298	7.17872	2.12201
orf19.6600		2	13	128	2.08424	12.0375	5.77546
orf19.661	KRR1	7	28	50	6.17762	12.382	2.00433
orf19.6632	ACO2	12	106	113	5.63207	12.382	2.19848
orf19.6672	MDJ1	8	37	100	4.909	13.8967	2.83085
orf19.6679		7	22	28	2.56732	5.18561	2.01985
orf19.6689	ARG4	1	13	40	5.18479	19.6445	3.78887
orf19.6692	MNN26	6	42	83	6.04185	14.5067	2.40103
orf19.6693		6	45	79	5.95699	11.9322	2.00306
orf19.6702	DED81	31	61	215	2.07511	9.40733	4.53341
orf19.6769		13	47	83	3.13151	9.5758	3.05788
orf19.6782	BMT1	5	51	113	3.84928	10.799	2.80547
orf19.6783		20	75	464	4.15045	43.13	10.3916
orf19.681	HAP43	21	42	55	2.44698	5.55601	2.27056
orf19.6824	TRY6	1	16	31	9.41352	30.4611	3.23588
orf19.6899		1	21	27	10.3381	24.9454	2.41296
orf19.690	PLB2	0	7	17	21.1804	74.5035	3.51756
orf19.6921		10	25	93	3.76541	17.5394	4.65803
orf19.6988	OST1	0	6	12	2.64755	6.46732	2.44275
orf19.700	SEO1	1	21	354	6.53063	136.667	20.9271
orf19.701	CFL11	3	46	162	21.1804	97.2038	4.58932
orf19.7033		15	45	66	2.75787	7.42125	2.69094
orf19.7042		10	51	75	4.61625	12.6262	2.73517
orf19.7049	CYB5	6	32	49	3.62813	9.44229	2.60252
orf19.7064	GLN4	14	65	66	2.90495	6.16012	2.12056
orf19.7072	PEL1	1	10	51	10.149	29.394	2.89626
orf19.7093	HGT13	145	37	7	-4.68357	-10.6518	-2.2743
orf19.7095		5	18	78	2.09598	10.6953	5.10278
orf19.7153		9	56	138	6.07957	14.9179	2.45379
orf19.717	HSP6	160	1100	1443	3.91383	10.0339	2.56371
orf19.7197		3	31	137	3.48996	15.1335	4.33631
orf19.7219	FTR1	20	82	227	2.61425	7.57775	2.89863
orf19.7254		0	11	46	11.2962	46.5647	4.12215
orf19.726	PPZ1	9	29	45	2.55466	7.84248	3.06987
orf19.728	TSC11	8	36	38	3.11823	11.7188	3.75815
orf19.7313	SSU1	10	25	48	2.17235	4.92511	2.26718
orf19.734	GLK1	29	17	0	-3.35094	-11.0082	-3.2851
orf19.7344		4	17	34	2.8552	10.1347	3.54954
orf19.7354	LAC1	4	21	39	5.77648	16.6151	2.87634
orf19.7359	CRZ1	16	107	53	3.0618	6.6521	2.17261
orf19.7369	TRM12	1	8	22	2.9785	9.895	3.32214
orf19.7370		3	22	45	5.77648	14.6044	2.52825
orf19.7371	ZCF35	10	37	85	3.47491	11.2774	3.24537
orf19.7377	ASE1	11	3	178	-3.68265	10.7457	39.5726
orf19.7393		17	55	83	2.11804	4.93586	2.33039
orf19.7436	AAF1	19	47	56	2.77625	5.9661	2.14898
orf19.7450		2	11	15	2.29455	5.35494	2.33377
orf19.746		0	9	15	8.29567	35.8548	4.32211
orf19.7469	ARG1	9	59	139	7.33593	16.4432	2.24146
orf19.7475	PHO81	4	45	55	13.2378	37.4181	2.82661
orf19.7501		90	208	492	2.00288	5.09405	2.54336
orf19.7502		21	49	50	2.34564	6.12693	2.61205
orf19.7514	PCK1	233	4135	1051	15.6609	5.29279	-2.95892
orf19.7516		27	68	93	2.20629	4.49017	2.03516
orf19.7534	MIS12	8	123	173	17.7484	37.7045	2.12439
orf19.7571	UBC4	27	62	64	2.23571	5.38081	2.40675
orf19.7574		21	52	111	2.19437	4.75086	2.16502
orf19.7585	INO1	2	111	27	9.15612	4.21993	-2.16974
orf19.7590		146	395	732	2.43436	5.10773	2.09818
orf19.76	SPB1	38	239	569	4.84611	14.7251	3.03854
orf19.7600	FDH3	13	40	42	2.07602	6.38602	3.07609
orf19.772	LYS21	16	74	144	2.73407	6.1858	2.26248
orf19.787		6	21	56	2.31757	14.3338	6.18486
orf19.789	PYC2	264	629	2371	2.09735	9.85581	4.69916
orf19.801	TBF1	12	59	65	2.68357	6.67586	2.48767
orf19.813		32	232	750	4.22289	11.9567	2.8314
orf19.829	SCH9	17	170	741	4.92878	22.6893	4.60343
orf19.85	GPX2	10	39	118	3.53007	16.8797	4.78169
orf19.850		6	20	48	2.05921	6.59667	3.2035
orf19.930	PET9	485	1685	3713	2.80155	8.40079	2.99862
orf19.939	NAM7	47	158	291	2.63179	6.54816	2.4881
orf19.941	SEC14	21	151	205	2.91326	7.78582	2.67255
orf19.969		24	109	98	4.48047	10.1413	2.26343
orf19.984	PHO8	1	19	24	9.11935	20.9541	2.29776
tD(GUC)7	tD(GUC)7	306	73	7	-2.75012	-11.02	-4.0071

## Sheet: Only hyphae with cells
ORF name	Gene symbol	Read Count		Gene expression fold change
		0ca	3pkca	3hpkca/0hca
Ca19-mtDNA:5525-9928		13	19	-1.64792
CaalfMt20	tK(UUU)6mt	3	35	4.03454
CEN1		8	1	-4.85094
CEN2		3	14	9.31294
CEN3		1	9	15.1335
CEN4		2	6	12.8053
CEN5		1	9	7.45035
CEN6		1	7	19.79
CEN7		2	13	5.52956
CENR		2	19	10.4771
chi-6a		6	17	3.20132
iota-2a		0	5	5.82059
kahu-3a		0	5	30.2671
koppa-1a		5	0	-9.87873
koppa-3a		0	5	5.43255
mu-Ra		3	15	15.3663
nu-2a		1	7	11.6412
orf19.1002		1	55	29.782
orf19.1005		9	21	2.48345
orf19.1007	KCS1	2	13	5.58776
orf19.1011	MNN21	1	11	18.363
orf19.1012		11	64	26.6735
orf19.102		9	19	18.2378
orf19.1027	PDR16	2	6	7.916
orf19.1028	ELA1	2	15	11.1423
orf19.1032	SKO1	3	10	6.11162
orf19.1042	POR1	41	21	1.5809
orf19.1045		28	37	3.1669
orf19.1052		1	22	6.9071
orf19.1054		2	6	2.36405
orf19.1055	CDC3	13	22	3.67425
orf19.1058		70	151	3.45559
orf19.1066	GIG1	0	5	6.50761
orf19.1067	GPM2	1	6	4.65647
orf19.1075		11	18	1.87552
orf19.1080		6	43	12.8053
orf19.1083		1	20	12.3396
orf19.1085		2	22	2.47375
orf19.109		26	72	18.0608
orf19.1092		1	8	10.186
orf19.1097	ALS2	2	11	5.43255
orf19.1105		714	1275	2.04183
orf19.1105.3		3	7	5.01775
orf19.1106		0	8	5.48798
orf19.1108	HAM1	8	15	2.69202
orf19.1112	BUD7	0	6	27.5508
orf19.1113		18	32	3.10431
orf19.1116		0	10	4.13908
orf19.1135	CAS1	3	12	8.14882
orf19.1143		6	12	3.13416
orf19.1154	EGD1	2	7	5.23853
orf19.1166	CTA3	41	212	4.51951
orf19.117		178	227	1.73805
orf19.1170	ARO7	14	30	1.90139
orf19.1171	BTA1	2	19	4.93038
orf19.1190	STV1	3	20	1.91737
orf19.1191		48	68	1.51162
orf19.1196	PKH3	20	31	1.20358
orf19.1210		26	43	2.42136
orf19.122	CDC2	15	22	1.48611
orf19.1220	RVS167	27	46	2.7493
orf19.1227	ZCF4	6	11	1.12466
orf19.1228	HAP2	2	9	14.7455
orf19.1237	ARO9	13	26	3.49235
orf19.1239		0	12	7.50209
orf19.1246		2	35	11.6412
orf19.125	EBP1	89	98	1.31988
orf19.1254	SEC23	3	7	5.23853
orf19.1255	ZCF5	148	79	-1.05186
orf19.1261	CGT1	6	15	3.63787
orf19.1263	CFL1	2	10	4.78582
orf19.1265		7	12	2.91029
orf19.1266		19	58	2.55459
orf19.1267		0	6	26.7747
orf19.1270	FRE3	14	34	2.49454
orf19.1274		0	9	5.32168
orf19.1277		2	8	6.25713
orf19.1286		4	11	1.68797
orf19.1289	SCT1	3	29	15.4246
orf19.1290	XKS1	19	26	1.95161
orf19.1291	ABZ1	32	9	-1.60458
orf19.1296		12	28	2.68253
orf19.1299	RPN6	0	8	19.79
orf19.130		1	4	8.04299
orf19.1300		31	51	2.32823
orf19.1303		0	20	41.5907
orf19.1304		0	18	27.706
orf19.1306		0	11	17.8498
orf19.1311	SPO75	0	6	4.50125
orf19.1313	CDR3	7	25	-2.6927
orf19.1314		7	12	2.82714
orf19.1318		24	38	1.8208
orf19.1323		1	12	9.31294
orf19.1326		37	81	3.15605
orf19.1330		11	26	2.74861
orf19.1332	SNG4	1	9	6.05341
orf19.1339	CPY1	2	6	8.31512
orf19.1343	MED16	121	169	1.13899
orf19.1350		10	24	2.54205
orf19.1351		7	24	4.14426
orf19.1353		0	5	5.35494
orf19.1364		1	4	-10.1874
orf19.1365		8	20	4.22758
orf19.1367.1		2	12	8.14882
orf19.1369		1	6	1.74618
orf19.137		9	30	3.49235
orf19.1370		0	6	23.8644
orf19.1373	INP51	1	4	30.2671
orf19.1396		11	40	4.57332
orf19.1409	VAC7	5	11	1.5832
orf19.1418	SEC15	10	42	5.33043
orf19.1424		11	17	1.11238
orf19.1430		6	17	1.77389
orf19.1433		0	17	30.2671
orf19.1435	TEF1	21	4	-2.85317
orf19.1440		89	255	3.86644
orf19.1442	PLB4.5	3	15	3.78338
orf19.1444		25	50	2.86179
orf19.1445	ESC4	20	39	1.83287
orf19.1451	SRB9	2	11	6.9847
orf19.1462	SMP2	52	101	1.53236
orf19.1464	BMT5	88	106	1.77764
orf19.1470	RPS26A	14	20	2.39116
orf19.1471	COX4	136	317	2.90622
orf19.1478	STT3	72	81	-1.25549
orf19.1481	HAP42	27	45	2.90161
orf19.1483		29	48	2.86872
orf19.1491		0	6	19.2079
orf19.1493	RAD7	2	18	6.59667
orf19.1497	ZCF6	6	41	8.25005
orf19.1502		0	23	13.9694
orf19.1508		0	6	10.4771
orf19.1516		1	10	10.3108
orf19.1524	SPR3	35	61	2.13148
orf19.1525		1	6	-1.47261
orf19.1526	SNF2	4	14	-1.8346
orf19.1527		84	198	3.51548
orf19.1529		2	6	7.56676
orf19.1534		5	40	9.24185
orf19.1535		7	20	3.71409
orf19.1538	TLG2	7	44	8.96802
orf19.1541		7	16	3.54527
orf19.1543	OPI1	8	79	30.7464
orf19.1547		10	18	2.49454
orf19.1553	ENT3	0	5	4.30723
orf19.1560	POB3	48	98	2.03533
orf19.1562		47	60	2.69648
orf19.1567		27	33	1.26995
orf19.1574		34	47	1.7109
orf19.1580		3	11	7.77842
orf19.1584		1	12	17.4618
orf19.1587	HGT2	6	57	11.6412
orf19.1589		4	8	1.57987
orf19.1595		0	18	6.91623
orf19.1596	FGR28	8	19	2.87149
orf19.1598	ERG24	3	22	5.82059
orf19.1599		6	15	1.41582
orf19.1605	PMS1	1	4	19.79
orf19.1606		4	12	3.49235
orf19.1608		9	28	7.33394
orf19.1611		8	37	5.60893
orf19.1619		2	25	24.2524
orf19.1622	YCG1	20	43	3.2677
orf19.1624		15	53	4.44089
orf19.1628	LAP41	18	43	4.02964
orf19.163	PAN6	29	36	2.25361
orf19.1630		0	12	10.7681
orf19.1632		59	76	1.73044
orf19.1636	STE5	0	7	1.60759
orf19.1648	RAD5	2	8	5.42523
orf19.1651		23	67	3.94506
orf19.1655.3		2	5	7.79959
orf19.166	ASG1	11	45	3.78338
orf19.1668		17	238	20.6366
orf19.1670	BRO1	0	5	13.9694
orf19.1671	UTR2	44	83	2.32823
orf19.1671.1		38	148	4.50272
orf19.1673	PPT1	1	4	4.65647
orf19.1674	CDC53	3	36	17.0252
orf19.1676		25	67	6.65524
orf19.168		20	45	7.69094
orf19.1682		0	5	16.2976
orf19.1683	PPH21	7	15	1.94811
orf19.1686		45	65	2.27762
orf19.1698		6	16	4.78582
orf19.1714	PGA44	6	14	2.7391
orf19.1720		1	8	13.9694
orf19.1729		11	23	2.69864
orf19.1730		0	9	14.2604
orf19.1744	HEM4	0	6	5.82059
orf19.1748		13	30	3.45078
orf19.175		1	11	12.4727
orf19.1760	RAS1	2	6	1.62976
orf19.1763	IFR1	24	48	1.76946
orf19.1764		3	18	3.20132
orf19.1767		14	27	1.76495
orf19.1768		8	49	14.934
orf19.177		4	18	17.2955
orf19.1773	RAP1	9	64	5.62146
orf19.1774		10	26	2.37575
orf19.1778		2	18	4.33898
orf19.1780		6	14	2.97497
orf19.1782.1		1	15	18.6259
orf19.1789.1	LYS1	1	5	10.7681
orf19.1791		0	27	30.7413
orf19.1792		0	49	39.1726
orf19.1793		6	23	3.63787
orf19.1794		5	17	14.988
orf19.1795	PUF3	8	123	27.0278
orf19.1795.1		27	50	4.0215
orf19.1799	GAP5	1	6	3.58936
orf19.1800		16	50	4.15756
orf19.1803	CDC43	18	24	1.26995
orf19.1808	MED5	0	8	32.5953
orf19.1814	STT4	13	58	2.69864
orf19.1821		147	254	2.39097
orf19.1823		0	10	15.1335
orf19.1834		12	40	6.08923
orf19.1835	PEA2	4	14	7.98252
orf19.1836	APN2	18	88	5.69541
orf19.1840		1	8	12.3396
orf19.1844		184	243	1.28089
orf19.1847	ARO1	2	11	7.76078
orf19.1850	SIW14	16	5	-1.31716
orf19.1857		0	6	2.97497
orf19.1880	HEM15	6	14	6.15319
orf19.1881		14	3	-1.10445
orf19.1883	YCS4	11	20	9.40025
orf19.1886	RCL1	29	55	9.73202
orf19.1888		1	33	21.7302
orf19.1890		1	4	2.03721
orf19.1891	APR1	13	21	2.60762
orf19.1907	EMC9	203	196	1.20249
orf19.1926	SEF2	24	30	1.55873
orf19.1930	CFL5	7	17	3.59818
orf19.1932	CFL4	0	16	75.0856
orf19.1942	SGE1	4	10	3.49235
orf19.1943		11	49	4.35605
orf19.1946		9	22	3.05581
orf19.1975		1	4	2.91029
orf19.1977	URA4	1	5	1.61841
orf19.1979	GIT3	7	17	6.29993
orf19.1980	GIT4	30	122	3.43214
orf19.1985		2	12	13.9694
orf19.1988	CDC45	3	20	7.17872
orf19.199		2	20	17.6281
orf19.1991		7	28	3.01301
orf19.1992	SIR2	32	39	3.00047
orf19.1994		6	26	3.04461
orf19.1995	MNN24	12	30	4.08629
orf19.1998		100	111	1.58064
orf19.2002		4	19	3.04461
orf19.2007		33	114	-2.11599
orf19.2024		15	28	6.45254
orf19.2038		2	5	5.23853
orf19.204		1	6	18.2378
orf19.2040		5	10	2.24508
orf19.2041		4	17	4.48185
orf19.2044	PGA27	5	21	6.07928
orf19.2049		0	14	14.9395
orf19.2055	NPL6	1	5	-2.89919
orf19.2070		11	21	3.91567
orf19.2072		3	18	2.80446
orf19.2073		4	10	5.58776
orf19.2075	DFG5	23	54	3.99126
orf19.2081	POM152	71	34	-1.35507
orf19.2084	CDH1	22	70	2.85209
orf19.2088		9	21	1.6815
orf19.2094	PDR6	0	14	8.43985
orf19.2095		17	115	4.65647
orf19.2111		58	84	1.55216
orf19.2124		1	4	2.25768
orf19.2125		7	48	2.10776
orf19.2129		2	10	1.09021
orf19.2131		6	20	1.97629
orf19.2135	TSM1	7	15	2.49454
orf19.2149		65	106	2.19777
orf19.215		3	17	2.24508
orf19.2160	NAG4	96	25	-1.474
orf19.2168.3		0	7	27.9388
orf19.217		2	11	6.33797
orf19.2173	MAF1	2	9	10.7099
orf19.2187	ALG7	9	1	-3.24519
orf19.2193	PRS5	0	7	3.958
orf19.2197		18	44	4.22408
orf19.22		0	6	10.4771
orf19.22.1		0	9	11.4957
orf19.2204		1	8	22.1182
orf19.2204.2	RHO2	15	26	4.81704
orf19.2210		5	17	4.32386
orf19.2215	GLE1	29	41	3.00586
orf19.2216	PDS5	19	88	4.47458
orf19.2222		17	32	2.37885
orf19.2228		3	20	4.65647
orf19.2237.1		0	5	1.43276
orf19.2247		0	5	16.0066
orf19.2249		0	5	8.14882
orf19.225		7	15	2.00487
orf19.2252		4	23	3.73743
orf19.2257		1	6	5.43255
orf19.2264	OLE2	4	9	2.45758
orf19.2267	RFA2	10	28	5.43255
orf19.2281		34	43	1.06398
orf19.2284		2	22	8.14882
orf19.2288	CCT5	1	4	8.32792
orf19.229		39	114	2.19664
orf19.2297	ARL3	7	22	5.94101
orf19.2309.2	RPL2	7	26	1.09136
orf19.2311	RPL82	0	12	4.53858
orf19.2312		0	14	11.112
orf19.2313		5	10	1.74618
orf19.2320		2	7	7.46975
orf19.2324	UBA4	1	6	5.04451
orf19.2329.1	RPS17B	0	8	4.51951
orf19.2334	BIG1	0	10	9.28455
orf19.2336		1	4	2.76478
orf19.2346		0	5	10.2442
orf19.2351	NIT3	11	49	2.19595
orf19.2356	CRZ2	0	20	52.1525
orf19.2361	SPT1	2	75	15.2629
orf19.2366		2	10	8.61447
orf19.2368		3	10	4.65647
orf19.2370	DSL1	0	9	18.3931
orf19.238	CCP1	8	20	3.12195
orf19.239		121	155	2.90433
orf19.2395	IME2	104	250	3.06451
orf19.2397		0	8	48.3109
orf19.2399		30	36	1.96062
orf19.2400		1	8	17.4618
orf19.2411	SYN8	15	22	4.92104
orf19.2445		2	10	3.78338
orf19.2447		5	10	2.36579
orf19.2460		4	29	29.5078
orf19.2461	PRN4	4	14	9.02191
orf19.2468		17	47	5.5169
orf19.247		5	0	-1.50328
orf19.2478.1		2	5	4.15756
orf19.2479	UGA4	0	6	4.0215
orf19.250	SLC1	1	12	6.9847
orf19.2501	FLC1	1	16	7.31731
orf19.2503		97	127	1.63866
orf19.2510		1	5	5.23853
orf19.2511.2		3	26	12.3576
orf19.2513		1	5	7.52796
orf19.2516		5	15	13.1477
orf19.2517		4	20	10.8263
orf19.252		1	5	3.91567
orf19.2521		0	6	9.31294
orf19.2525	LYS12	15	51	3.74309
orf19.2527		0	6	11.1755
orf19.2528		0	6	6.58174
orf19.2531	CSP37	17	53	5.15538
orf19.2533.1		1	5	1.6417
orf19.2534	PIN4	3	19	6.46732
orf19.2537		27	43	3.93128
orf19.2539		4	33	26.0339
orf19.2540	SAS3	14	98	6.64163
orf19.2541		7	61	8.48302
orf19.2545	DOT6	1	4	6.40265
orf19.2547		9	32	10.3477
orf19.2552		3	26	11.0591
orf19.2553		1	15	3.0766
orf19.2555	URA5	0	5	3.49235
orf19.2559	CDC4	0	6	5.82059
orf19.2565		80	127	2.50411
orf19.2571	SEC4	16	43	3.12714
orf19.2579		1	7	2.24038
orf19.2582		2	21	8.14882
orf19.2583	PTR2	39	83	2.39987
orf19.2599	CRC1	1	5	16.2976
orf19.260	SLD1	24	38	1.83635
orf19.2600	SPC98	3	7	4.11918
orf19.2602	OPT1	7	31	5.18561
orf19.2607		17	48	3.80278
orf19.2609	CET1	1	5	2.91029
orf19.2614	RSR1	8	25	2.35249
orf19.2615	MDL1	8	16	2.22701
orf19.2619	PHO113	12	20	3.56083
orf19.262	SMC3	2	14	5.04451
orf19.2623	ECM22	10	22	3.68637
orf19.2624		117	148	1.9976
orf19.263.1		4	10	15.1335
orf19.2637		37	145	5.39295
orf19.2641	ARP1	0	6	4.75512
orf19.2646	ZCF13	1	4	11.6412
orf19.2649	PCL1	31	56	2.79388
orf19.2650		2	18	13.1933
orf19.2650.1		23	48	3.8005
orf19.2663		2	5	7.66377
orf19.2664		8	22	3.49235
orf19.2665	MSN5	33	52	3.43692
orf19.2673		152	191	1.81483
orf19.2678	BUB1	2	5	5.23853
orf19.268		5	23	4.33898
orf19.2681	RBT7	1	35	14.7843
orf19.2685	PGA54	1	13	15.7156
orf19.2686		209	378	2.40009
orf19.2687.1		36	53	2.49654
orf19.269	SES1	0	5	5.23853
orf19.2691		8	18	1.89638
orf19.2703		7	19	2.66777
orf19.2706	CRH11	22	29	1.40737
orf19.2713		165	252	1.43803
orf19.2717	SAS1	0	7	6.69368
orf19.2720		3	22	11.0868
orf19.2723	HIT1	0	22	11.6412
orf19.2727	GRX3	0	6	5.29144
orf19.2734		0	7	20.9541
orf19.2740		22	55	3.10431
orf19.2748	ARG83	1	14	13.9694
orf19.2749		34	108	3.12857
orf19.2753	ZCF15	3	32	12.4173
orf19.2755		30	45	3.20132
orf19.2761		1	6	2.01075
orf19.2763		2	17	14.2604
orf19.2765	PGA62	8	25	1.5859
orf19.2775	IDI1	720	1808	3.25907
orf19.2779		7	25	2.76478
orf19.2781		20	33	5.11199
orf19.2783	PIR32	61	124	2.58863
orf19.2787	PRY1	1	13	13.3874
orf19.2798		103	107	1.88895
orf19.2800		6	0	-7.4999
orf19.2803	HEM13	0	6	9.50172
orf19.2805	PEX8	43	7	-2.73124
orf19.2810	AAP1	23	44	2.29068
orf19.2820		13	45	5.31445
orf19.2826		16	6	-1.12491
orf19.2833	PGA34	14	47	4.37622
orf19.2841	PGM2	13	5	-1.28853
orf19.2848		74	36	-1.07206
orf19.2857		24	88	11.4295
orf19.2862	RIB1	20	36	3.42885
orf19.2864.1	RPL28	8	1	5.02409
orf19.2873	TOP2	0	6	6.27918
orf19.2879	IFF5	35	80	2.91925
orf19.2883	CSO99	33	71	2.67432
orf19.2885	PRI2	2	29	14.4986
orf19.2887		4	22	6.6521
orf19.290	KRE5	17	24	3.69561
orf19.2903	AGO1	38	90	2.48698
orf19.2911	SEC3	77	183	2.6888
orf19.2915		13	21	2.4888
orf19.2919	MPH1	8	17	1.979
orf19.2921		10	16	-1.3458
orf19.2923		2	6	1.26113
orf19.2925		1	5	4.65647
orf19.2926		0	6	5.23853
orf19.2928		1	20	4.93038
orf19.2934		4	19	8.23837
orf19.2937	PMM1	3	15	5.12212
orf19.2938		0	5	8.29434
orf19.2939		4	37	11.2337
orf19.2945	PUT4	1	5	8.43985
orf19.2946	HNM4	7	42	5.07223
orf19.2949	IML1	3	7	4.90592
orf19.2951	HOM6	26	43	3.68936
orf19.2956	MGM11	2	86	31.7855
orf19.2958		2	6	2.32823
orf19.2959		7	26	5.56189
orf19.2964		4	11	4.07441
orf19.2974	YKT6	29	38	1.9006
orf19.2980		2	5	1.7014
orf19.2987		1	11	9.57163
orf19.2988		53	60	1.98051
orf19.2994	RPL13	23	212	8.34697
orf19.2996		2	5	5.72151
orf19.3006	GGA2	26	60	3.63787
orf19.3007		22	29	-1.0443
orf19.3009		0	5	5.58776
orf19.301	PGA18	1	7	2.10996
orf19.3013	CDC12	9	26	2.71627
orf19.3014	BMH1	28	39	1.9006
orf19.3016		318	513	1.89045
orf19.3035		0	7	6.20863
orf19.304		80	126	1.95737
orf19.3045		2	24	9.31294
orf19.3050	AGE1	17	5	-1.44193
orf19.3052	YPT1	13	18	1.80438
orf19.3053		2	12	1.69824
orf19.3058	COQ6	0	6	2.07358
orf19.306	USO5	8	2	1.16412
orf19.3062		2	11	7.41359
orf19.3065	DAO1	25	49	-1.09412
orf19.3077	VID21	16	3	-1.27939
orf19.3086	SEC1	14	43	2.34642
orf19.309	DAL5	11	28	1.79761
orf19.31		3	8	3.68637
orf19.3100		6	16	3.55362
orf19.3110		1	11	19.402
orf19.3123	RPT5	8	30	2.49454
orf19.3129		1	6	1.39694
orf19.3131	OYE32	4	8	6.07524
orf19.3136		8	15	8.14882
orf19.3138	NOP1	2	5	2.06954
orf19.3142		18	64	6.43249
orf19.3147		1	40	114.084
orf19.3148		2	6	9.31294
orf19.3150	GRE2	10	27	3.82496
orf19.3156		18	23	2.26171
orf19.3158		26	52	2.88119
orf19.3160	HSP12	11	26	2.67062
orf19.3166		6	0	-11.382
orf19.3167		69	86	1.83403
orf19.3181.1		2	10	2.68394
orf19.3190	HAL9	12	61	5.36326
orf19.3192	STI1	19	63	5.21846
orf19.320		49	93	3.35125
orf19.3202		5	10	-1.11933
orf19.3203	RCY1	4	23	3.90811
orf19.3204		2	26	24.4465
orf19.3207	CCN1	7	33	6.52918
orf19.3209	FGR42	6	16	5.98689
orf19.321		5	28	11.8352
orf19.3212	MID1	5	53	3.42387
orf19.3215		44	51	7.50209
orf19.3225	CWH43	60	75	3.23928
orf19.3227	FTH2	98	48	1.05829
orf19.3229		5	42	6.70753
orf19.3234	OYE22	4	30	5.82059
orf19.3234.1	SFT1	1	7	6.9847
orf19.3239	CTF18	1	4	2.16193
orf19.325		2	15	34.9235
orf19.3264	CCE1	15	52	4.32386
orf19.3269	GSL2	2	8	9.2321
orf19.328	NPR2	32	56	2.66566
orf19.3281		15	27	3.05257
orf19.3287	BUD22	8	17	5.0331
orf19.3295		1	5	6.9847
orf19.3303		1	5	3.61889
orf19.3306		23	61	4.17142
orf19.3308	STB5	1	6	6.9847
orf19.3312		15	21	3.25953
orf19.3315	CTA9	1	7	2.74732
orf19.332		2	8	5.92642
orf19.3324	TIF	5	14	3.71409
orf19.3329		110	175	2.31697
orf19.333	FCY2	14	32	2.55538
orf19.3332		21	27	-8.15155
orf19.3333		49	89	2.57331
orf19.3335		5	14	3.74542
orf19.3338		175	197	1.54132
orf19.3349		3	20	7.46975
orf19.335		104	192	2.98492
orf19.3350	MRP2	11	22	3.34051
orf19.3353		1	4	5.33554
orf19.3369	MOH1	34	4	-1.86743
orf19.3371	JAB1	33	68	2.58503
orf19.3375		16	23	1.80639
orf19.3380	HWP2	1	7	6.9847
orf19.3393		2	10	4.26843
orf19.34	GIT1	2	5	11.1319
orf19.3409	SEC12	20	144	10.6168
orf19.3411		25	58	2.62865
orf19.3418		3	7	1.79095
orf19.3428		0	5	2.32823
orf19.3429	FGR47	58	93	3.61676
orf19.3433	OYE23	25	84	5.03481
orf19.3439		4	27	12.4727
orf19.344		7	22	4.52215
orf19.3440	FRP5	0	14	9.895
orf19.3443	OYE2	18	94	7.5974
orf19.3447		0	8	181.214
orf19.345		1	8	7.9548
orf19.3450.1		3	14	4.07441
orf19.3453		1	24	47.8951
orf19.3460		12	23	2.2728
orf19.3461		1	7	5.82059
orf19.3462	SAR1	1	12	11.0591
orf19.3467	SEC27	38	88	2.44465
orf19.3468	ALG11	63	151	2.83823
orf19.3469		14	33	2.67316
orf19.3471		3	11	9.66217
orf19.3473		2	10	12.262
orf19.3474	IPL1	3	12	7.88018
orf19.3476	HRR25	1	13	31.4312
orf19.3478	NIP7	87	133	2.05876
orf19.348	SKN2	1	5	10.4771
orf19.3494	CTF5	27	39	2.31229
orf19.3505		0	5	9.31294
orf19.3517		55	60	2.92503
orf19.3536		1	4	1.19088
orf19.3545		0	18	11.874
orf19.3554	AAT1	13	32	2.04367
orf19.3561	CDC7	77	93	1.62383
orf19.3569		2	18	11.7382
orf19.3591	APE3	10	45	4.9475
orf19.3601		16	64	3.46485
orf19.3604		3	13	6.2439
orf19.3605	PEX17	7	36	8.55052
orf19.3606		2	18	12.3526
orf19.3609	UTP15	2	15	7.99008
orf19.3610		9	55	13.4601
orf19.3615		6	22	6.01461
orf19.3617	GTR1	1	10	3.29833
orf19.3621		6	53	6.89516
orf19.3622	ANP1	2	9	13.3874
orf19.3623	SMC2	24	95	4.78582
orf19.3628	RSP5	12	31	2.85209
orf19.3638	PGA46	128	155	2.49897
orf19.3644		0	9	37.2518
orf19.3655		59	28	-2.57706
orf19.3667		1	4	3.20132
orf19.3674	GAL12	1	4	3.88039
orf19.3677		1	6	3.34684
orf19.3683	AGE3	1	4	15.1335
orf19.3689		1	29	7.47335
orf19.3693	PGA5	17	31	2.53611
orf19.3697		2	12	5.5031
orf19.3698		8	16	3.09093
orf19.3701		2	46	20.6215
orf19.3711		3	7	1.28884
orf19.3715	ASF1	2	13	11.3825
orf19.3720		2	5	5.82059
orf19.3721		13	53	4.7623
orf19.3722		0	7	7.64991
orf19.3727	PHO112	59	462	9.83032
orf19.374		1	6	16.2976
orf19.3746	IFC1	17	25	1.91172
orf19.3749	IFC3	50	79	1.72677
orf19.3756	CHR1	122	337	3.0943
orf19.3763		8	41	11.1039
orf19.3764	GSG1	0	6	16.6857
orf19.3767	PEP1	1	16	11.8075
orf19.3769		122	204	2.20124
orf19.377	PHR3	8	16	1.78255
orf19.3770	ARG8	1	4	3.36301
orf19.3773	CDL1	0	32	19.6237
orf19.3781		6	93	14.1064
orf19.3782		4	11	3.08149
orf19.3785		3	16	2.97497
orf19.3788	SPC34	4	9	1.62145
orf19.3793		0	7	51.2212
orf19.3795	AGP3	6	14	2.23869
orf19.3796	DCR1	11	22	5.82059
orf19.3798		7	14	4.98907
orf19.3801	FAV1	2	6	7.56676
orf19.3803	MNN22	1	20	5.01466
orf19.3806		17	32	3.68637
orf19.3811	GYP1	2	8	2.08316
orf19.3813		15	3	-1.06637
orf19.3815		15	45	2.42524
orf19.382	TEF2	45	15	-1.6935
orf19.3822	SCS7	197	114	-1.20614
orf19.3826		23	8	-1.25417
orf19.3827		16	27	2.21182
orf19.3836		19	27	2.73568
orf19.384		1	10	2.47844
orf19.3841		17	23	1.7748
orf19.3848		29	132	5.32168
orf19.3852		5	12	2.41778
orf19.3856	CDC28	12	40	6.19611
orf19.3863		8	19	2.77597
orf19.3868		0	17	7.98252
orf19.3871	DAD3	0	9	6.40265
orf19.3873	ARC4	0	10	45.4006
orf19.3878		0	5	5.12766
orf19.3886		9	28	7.72551
orf19.3894		6	12	4.44481
orf19.3900		1	8	8.14882
orf19.3901		15	54	2.62603
orf19.391	UPC2	8	82	7.93055
orf19.3911	SAH1	20	8	1.06434
orf19.3919		90	165	2.17222
orf19.3924		5	16	2.68951
orf19.3934	CAR1	6	20	5.76515
orf19.3945		5	0	-5.26425
orf19.3949		6	24	4.96989
orf19.3950	MSM1	56	72	1.80374
orf19.3957		6	14	2.76478
orf19.3959	SSD1	2	6	3.99126
orf19.3966	CRH12	229	448	2.25574
orf19.3968		2	10	3.05581
orf19.3970		2	35	14.697
orf19.3971		0	14	12.0292
orf19.3972		1	10	29.1029
orf19.3983		4	50	37.3223
orf19.3986	PPR1	14	136	16.7633
orf19.3996		22	33	3.32605
orf19.3998		4	13	5.0057
orf19.4011		2	5	2.66084
orf19.4012	PCL5	3	7	6.79068
orf19.4013		0	21	42.4071
orf19.4016		1	4	1.12254
orf19.4026	HIS1	4	15	2.4592
orf19.4029		1	6	8.78077
orf19.4033	PRP22	0	5	6.88769
orf19.4059		11	40	3.94009
orf19.406	ERG1	8	15	2.60762
orf19.4067	FGR18	37	45	2.27409
orf19.4068		0	8	9.70098
orf19.4070		4	12	3.06904
orf19.4080		0	7	18.6259
orf19.4082	DDR48	0	7	23.6704
orf19.4109	PMT4	0	19	-2.56186
orf19.4120	LAS1	30	14	-1.25274
orf19.413.1	RPS27A	8	14	3.06904
orf19.4131		0	10	14.3574
orf19.4148		14	28	1.38667
orf19.4162	MLH1	13	1	-1.95232
orf19.4163		1	14	15.7156
orf19.4167		42	48	2.70376
orf19.417	MTM1	1	5	9.895
orf19.4170	CSP2	0	5	23.2823
orf19.4171		2	5	4.65647
orf19.4173		8	32	5.2833
orf19.418	KOG1	29	13	1.2297
orf19.4191.1		106	139	1.88429
orf19.4201	NHX1	16	33	1.10868
orf19.4208	RAD52	19	26	2.30116
orf19.4210		2	9	9.60397
orf19.4212	FET99	77	92	1.73949
orf19.4213	FET31	2	5	3.78338
orf19.4222	SST2	10	32	3.06904
orf19.4230		3	16	14.9966
orf19.4232	PTH1	42	47	1.19601
orf19.4234		2	23	6.40265
orf19.4240		2	31	12.2232
orf19.4246		2	7	3.42768
orf19.4251	ZCF22	307	163	-1.87701
orf19.4255	ECM331	3	12	4.21993
orf19.4257	INT1	4	8	1.0089
orf19.426		83	150	4.66885
orf19.4263		1	7	5.48798
orf19.4264		13	29	4.60796
orf19.4266	SPR28	10	36	3.38652
orf19.4270	MNN13	0	13	23.2096
orf19.4275	RAD9	5	27	5.70418
orf19.4279	MNN1	17	41	6.42795
orf19.4284	BUR2	18	41	2.97497
orf19.4288	CTA7	2	12	7.10112
orf19.4294		33	63	2.57517
orf19.4299	MSW1	1	8	3.85614
orf19.4301		4	15	4.41395
orf19.4308	HSL1	2	7	1.62976
orf19.431	ZCF2	38	56	1.63352
orf19.4310		39	44	1.36862
orf19.4312		1	5	27.3568
orf19.4315		19	31	6.1858
orf19.4316		21	47	3.14626
orf19.4325		8	2	-1.47261
orf19.4330		11	20	2.45077
orf19.4341		2	14	5.66537
orf19.4349		1	13	22.1182
orf19.4355		24	57	4.4326
orf19.4356	HGT3	2	14	8.14882
orf19.4357		28	42	1.89638
orf19.4362		5	16	3.0766
orf19.4365		7	26	-1.07689
orf19.4366		2	38	15.1335
orf19.4367	SMC1	1	14	6.51906
orf19.4368		21	41	2.29186
orf19.4371	TAL1	16	39	2.35595
orf19.4374	PRP42	140	141	1.12359
orf19.4375.1	RPS3	1	13	7.37274
orf19.4381	VTC3	1	4	7.20298
orf19.4388		62	111	2.83683
orf19.4391		3	19	2.48698
orf19.4392	DEM1	32	7	-1.80846
orf19.4394		25	64	1.96752
orf19.4396		2	7	2.32823
orf19.4404	PGA49	103	58	-1.01412
orf19.4405	PPS1	8	34	5.75211
orf19.4412		10	27	4.10865
orf19.4423		16	57	2.7062
orf19.4424	PHO1	62	88	1.33874
orf19.4441		12	4	1.08901
orf19.4444	PHO15	2	7	3.49235
orf19.4449		2	18	5.40972
orf19.4463		22	32	4.1611
orf19.4465		0	6	80.3241
orf19.4468		2	22	13.5461
orf19.4471		0	5	5.90682
orf19.4475	KTR4	22	248	12.6917
orf19.4478		2	9	7.76078
orf19.448	CUE5	14	24	2.41139
orf19.4481	MFALPHA	35	52	2.40471
orf19.4490.2	QCR8	1	8	5.62657
orf19.4494	KTR2	1	40	12.8386
orf19.450		7	26	11.1934
orf19.451	SOK1	1	4	2.91029
orf19.4510	IFA4	258	333	1.5534
orf19.4511		6	40	7.48361
orf19.4515		21	28	1.97004
orf19.4535	PTR3	16	3	-4.11102
orf19.4536	CYS4	2	16	6.79845
orf19.4557		0	7	15.3173
orf19.4560	BFR1	12	22	2.57331
orf19.4565	BGL2	38	441	8.98875
orf19.4568	ZCF25	3	15	4.86942
orf19.457		4	29	14.9007
orf19.4571		68	87	1.5011
orf19.4574		2	10	2.13422
orf19.4589		21	45	3.24065
orf19.459	ADP1	1	8	5.70418
orf19.4592	HSX11	72	83	1.41019
orf19.4593	RGA2	9	22	2.66084
orf19.4595		91	57	1.36127
orf19.4601		1	5	2.56106
orf19.4614		5	1	1.82933
orf19.4615		31	41	1.5965
orf19.4622		1	4	18.1602
orf19.4623		12	3	-1.66942
orf19.4629		16	3	-1.64334
orf19.4642		7	80	7.42125
orf19.4645	BEM1	1	9	5.69805
orf19.4647	HAP3	17	38	3.87334
orf19.4654		9	123	14.6346
orf19.4655	OPT6	0	18	8.14882
orf19.4656		7	71	12.9023
orf19.4658		1	7	14.5515
orf19.4659		32	122	5.17085
orf19.4660	RPS6A	3	10	1.53599
orf19.4673	BMT9	2	76	10.058
orf19.4674.1	CRD2	17	24	4.04017
orf19.4675	ASK1	0	10	13.2418
orf19.4678		0	6	7.48361
orf19.4679	AGP2	8	0	-1.30155
orf19.4683	MLP1	259	84	-2.00164
orf19.4688	DAG7	196	220	2.00763
orf19.4689	PGA57	15	152	9.31294
orf19.469	HST7	2	10	2.28809
orf19.4703		12	34	2.69585
orf19.4707		1	13	7.916
orf19.4711		2	10	4.26843
orf19.4713		24	30	2.29186
orf19.4715		12	19	3.27062
orf19.4719	CWH41	387	447	1.33294
orf19.4728		13	58	4.41562
orf19.4731		67	96	3.69579
orf19.4737	TPO3	2	9	1.81085
orf19.4743	AFG1	21	7	-2.03041
orf19.4747	HEM14	3	11	2.83754
orf19.4748		1	5	3.72518
orf19.475		18	5	-1.83258
orf19.4753	PFK26	2	8	5.43255
orf19.4754	ZWF1	45	118	-1.37532
orf19.4756		70	187	1.3977
orf19.4758		16	24	2.23123
orf19.4761	HST1	5	13	3.47471
orf19.4763		6	32	8.74966
orf19.4764		1	7	9.64554
orf19.4768		48	79	2.09894
orf19.4769	IPT1	5	27	7.56676
orf19.477		33	42	1.93073
orf19.4772	SSU81	1	6	10.8651
orf19.4777	DAK2	24	33	2.0669
orf19.478		73	83	1.18871
orf19.4784	CRP1	0	13	20.7213
orf19.4785	PTC1	29	79	3.34684
orf19.4787		2	9	3.25953
orf19.4789		9	17	3.13416
orf19.4802	FTH1	0	11	41.9082
orf19.4807		3	8	2.64572
orf19.4816		5	11	2.63574
orf19.4821	LIP1	5	43	6.27611
orf19.4822	LIP1	2	6	4.65647
orf19.4823	LIP6	18	34	1.95572
orf19.4825		4	15	3.05581
orf19.4827	ADE12	1	9	2.16193
orf19.4835		70	263	4.82277
orf19.4843		1	8	6.65875
orf19.4848	SKI3	12	43	3.67616
orf19.4849		63	97	2.1324
orf19.4850		1	11	4.65647
orf19.4863	PDC2	67	83	1.79213
orf19.4864		11	83	6.20863
orf19.4865		16	25	1.71554
orf19.4869	SFU1	12	45	5.40972
orf19.4882		6	25	3.63787
orf19.4884	WOR1	1	7	2.57912
orf19.4893		2	14	10.089
orf19.4904		78	80	1.26876
orf19.4913		2	6	6.51906
orf19.4916		50	13	1.34867
orf19.4931.1	RPL14	6	0	-2.68444
orf19.4939	MON2	2	6	2.14914
orf19.4948	REX3	51	140	3.01943
orf19.4951		2	37	3.71186
orf19.4954		21	99	5.3379
orf19.4955		2	5	10.9248
orf19.4956	RPN1	2	5	6.15319
orf19.4962	RMP1	115	166	2.1365
orf19.4965		4	28	17.4618
orf19.4969	KEM1	2	10	9.57163
orf19.4972		119	263	2.51859
orf19.4975	HYR1	1	8	19.79
orf19.4979	KNS1	17	42	3.43108
orf19.4982		39	14	2.06954
orf19.4984		0	7	10.7196
orf19.4985	GUP1	10	27	4.86813
orf19.50		2	5	2.42136
orf19.500		11	52	4.00456
orf19.5006.1		0	8	95.4576
orf19.5007	ACT1	2	7	2.52225
orf19.5011	KAR9	207	240	1.69468
orf19.5019		1	23	18.0438
orf19.5026		42	261	8.03241
orf19.5034	YBP1	208	204	1.73162
orf19.5035	HPC2	10	31	4.46245
orf19.5037	HRQ2	11	18	2.41139
orf19.504		2	12	14.5515
orf19.5043		39	52	1.92682
orf19.5045	PTP2	2	9	4.65647
orf19.5046	RAM1	38	42	1.56428
orf19.5052		17	55	4.39778
orf19.5068	IRE1	12	3	-4.21701
orf19.5070		77	86	1.6537
orf19.5078		78	91	3.45811
orf19.508	QDR1	2	5	1.40664
orf19.5092		4	13	4.42365
orf19.5095		1	4	4.15756
orf19.5124	RBR3	221	221	1.5085
orf19.5129		14	46	2.63192
orf19.5131		15	29	2.1065
orf19.5133	ZCF29	38	56	2.06299
orf19.5136		87	181	2.35734
orf19.5139		9	24	6.51906
orf19.5141		26	49	1.93287
orf19.5145	SSP96	5	11	3.49235
orf19.5161		0	7	8.73088
orf19.5164	ECM39	1	4	2.61926
orf19.5172	LIP9	2	5	1.57987
orf19.5178	ERG5	25	67	3.05581
orf19.5181	NIK1	94	158	2.24592
orf19.5182	POL3	63	125	2.65462
orf19.5190		26	36	1.76696
orf19.5197	APE2	2	6	5.82059
orf19.5201		156	158	1.78071
orf19.5209		1	4	2.28039
orf19.5210		3	12	5.98689
orf19.5211	IDP1	1	6	4.26843
orf19.5212		0	7	34.4246
orf19.5221		1	25	33.9922
orf19.5228	RIB3	37	76	3.44061
orf19.5241	SNT1	1	6	-1.06355
orf19.5242	CDC6	61	82	2.40945
orf19.5243	TRP3	2	5	12.2232
orf19.5245	BUL4	5	38	34.7295
orf19.5253		5	10	3.10431
orf19.5257	LCB4	8	13	2.91029
orf19.5258		1	5	4.36544
orf19.5263	SER33	1	17	6.59667
orf19.5270		10	20	12.4646
orf19.5271		2	6	2.97497
orf19.5274		2	16	11.6412
orf19.5289		69	113	2.6579
orf19.5291		3	17	5.937
orf19.5297		3	29	8.34284
orf19.5302	PGA31	17	39	4.03561
orf19.5303	PGA3	31	43	2.19889
orf19.5305	RHD3	1	7	7.37274
orf19.5316	FGR29	3	7	-1.77258
orf19.5318	RAD1	27	42	1.64035
orf19.532	RBR2	12	37	3.49235
orf19.5321		7	19	5.75709
orf19.5334		8	18	3.13107
orf19.5358		1	8	1.56708
orf19.5376		0	8	11.6412
orf19.538		12	31	3.08491
orf19.5384	CHS8	1	4	7.916
orf19.5387	VPS8	184	483	2.96927
orf19.5392	NGT1	23	52	3.0612
orf19.5395		1	10	4.44481
orf19.5426		48	55	-1.0623
orf19.5431		16	42	1.84502
orf19.5438		0	5	6.66722
orf19.5441	ULP3	1	9	6.28623
orf19.5468		20	26	1.42743
orf19.5469		3	8	1.35814
orf19.5479	FGR12	6	1	-4.6648
orf19.548	CDC1	1	11	6.9847
orf19.5486		6	0	-1.48677
orf19.5487	CDC46	29	48	2.75622
orf19.5498	EFH1	6	12	5.15538
orf19.5499		7	14	4.78582
orf19.550	PDX3	0	5	10.4771
orf19.5504		1	4	3.99849
orf19.5506	PLC1	15	107	16.9741
orf19.551		15	32	2.81328
orf19.5515		8	31	7.34849
orf19.5521	ISA1	0	6	16.5663
orf19.5535		6	1	-1.19516
orf19.554	DIT2	6	12	4.32386
orf19.5548	LYS14	2	6	8.9249
orf19.5551	MIF2	0	25	21.5362
orf19.5552		11	2	1.21955
orf19.5557	MNN4-4	12	20	3.6217
orf19.5558	RBF1	7	15	3.88039
orf19.556		7	13	3.56511
orf19.5563	RNH1	20	55	3.70023
orf19.5565		6	37	12.1586
orf19.5569		26	10	2.29913
orf19.5575		66	74	1.40204
orf19.5576		8	15	5.82059
orf19.5578		40	52	1.94766
orf19.5584	PEP3	2	10	6.40265
orf19.5585	SAP5	7	15	2.06954
orf19.5586		1	10	9.70098
orf19.5588	PGA6	9	23	3.20132
orf19.5592		3	23	12.3396
orf19.5618		4	13	8.84729
orf19.5620		8	15	1.51982
orf19.5621		10	41	6.68429
orf19.5625		18	37	4.43116
orf19.5628		0	7	5.82059
orf19.5636	RBT5	1	13	9.83032
orf19.5641	CAR2	103	17	-4.80415
orf19.5644		0	8	7.32267
orf19.5645	MET15	0	9	30.2223
orf19.5651		1	7	18.6601
orf19.5657	SWI1	26	39	1.92436
orf19.5673	OPT7	26	43	2.56909
orf19.5676		6	11	2.42524
orf19.5680		23	60	3.89148
orf19.5682		8	28	2.91029
orf19.5685	THS1	14	28	2.21558
orf19.570	IFF8	16	63	3.53502
orf19.5701		3	11	4.9475
orf19.5713	YMX6	2	13	7.30219
orf19.5714	SAP1	18	356	23.7972
orf19.5718		24	158	8.36197
orf19.5720		16	6	1.81602
orf19.5722		0	8	20.9541
orf19.5730		9	47	11.3138
orf19.5742	ALS9	1	5	6.40265
orf19.5765	NUP82	23	66	3.67861
orf19.577		9	29	2.19242
orf19.5779	RNR1	9	16	3.06904
orf19.578		46	21	-1.58382
orf19.5780		8	14	1.68596
orf19.5782		8	32	3.41959
orf19.5788	EFT2	31	71	3.10431
orf19.5789	ADE8	2055	3106	1.78114
orf19.5791	IDH2	3	8	2.48345
orf19.5804	HYU1	20	55	8.75192
orf19.581		54	77	2.57633
orf19.5812		70	110	2.21076
orf19.5816	EBP7	24	72	3.49235
orf19.5818	SUR2	2	15	17.4618
orf19.5821		10	36	7.85779
orf19.5824		21	26	2.42689
orf19.5828		6	10	2.94093
orf19.5830	LHS1	14	22	1.2639
orf19.5832	HPT1	25	86	2.69345
orf19.5840		2	8	3.35266
orf19.585		0	5	5.94993
orf19.5852		2	7	6.35787
orf19.5856		13	32	2.99344
orf19.5859	DAL8	1	8	3.65865
orf19.586	ERV46	2	18	1.54233
orf19.5866		0	6	8.14882
orf19.5870	CTP1	1	6	29.1029
orf19.5871	SNF5	2	5	7.48361
orf19.5880		0	7	3.9289
orf19.589	VPS21	23	10	-1.24948
orf19.5890		7	14	1.1135
orf19.5892		49	56	1.35362
orf19.5894		16	24	1.0186
orf19.5904	RPL19A	1	13	5.75932
orf19.5910		6	28	12.9127
orf19.5917	STP3	14	66	3.88039
orf19.5917.3		43	17	-1.26169
orf19.5932		54	73	2.74104
orf19.5933		11	24	2.63004
orf19.5947	SEC7	5	21	6.8184
orf19.5952		162	182	1.42392
orf19.5958	CDR2	2	9	1.74618
orf19.5962	HGT4	44	86	2.59567
orf19.5965		66	80	1.43743
orf19.5967	FGR44	31	96	3.72518
orf19.5973	PHB2	2	9	11.3725
orf19.5974	ATG9	2	7	2.32823
orf19.5994	RHB1	22	39	1.73694
orf19.6001	SAP3	0	6	36.0876
orf19.6002	RPL8B	2	7	2.63312
orf19.6003		2	30	14.254
orf19.6005	HGT5	23	31	1.97166
orf19.6008		27	40	1.7955
orf19.6012		28	59	2.87796
orf19.6016		24	64	3.83844
orf19.6022	NRM1	2	16	13.1933
orf19.6024		3	29	14.2604
orf19.6025		1	7	18.6259
orf19.6026	ERG2	0	8	27.9388
orf19.6027		3	9	4.11502
orf19.6029	ROT1	4	22	5.52956
orf19.6033	CMP1	6	26	8.02628
orf19.6034	TUB2	16	48	5.74628
orf19.6038	UGA32	44	221	4.75001
orf19.6046	APC1	13	20	2.26697
orf19.6049		24	30	4.91366
orf19.6053	CIS2	15	21	2.47375
orf19.6055		10	33	3.38652
orf19.606		4	21	5.5031
orf19.6060	GCN2	50	53	2.17556
orf19.6065		12	28	3.91735
orf19.6073	HMX1	13	4	-1.04991
orf19.6078.1	RFC52	1	6	5.31445
orf19.6080		5	0	-11.7597
orf19.6086	LEU4	9	21	-1.00219
orf19.6109	TUP1	3	57	7.72551
orf19.6112	CTA2	0	7	2.16406
orf19.6113		0	7	4.40702
orf19.6121	MNL1	1	6	1.49672
orf19.6124	ACE2	27	35	1.98752
orf19.6134		19	36	1.8805
orf19.6138		21	35	2.32823
orf19.6155		7	17	2.71627
orf19.6166		8	15	3.08149
orf19.6168		9	24	1.5383
orf19.6171	NUP159	27	46	2.14634
orf19.6195		36	52	1.29844
orf19.6197	DHH1	13	30	2.7284
orf19.6198.1		99	47	1.26837
orf19.6200		3	16	3.49235
orf19.6202	RBT4	1	8	7.56676
orf19.6211		47	155	4.18293
orf19.6217	PGA63	1	5	2.4495
orf19.6219		152	152	1.30069
orf19.6230		6	15	3.74542
orf19.6232	NPR1	3	35	9.70098
orf19.6236	NOP6	27	32	1.57371
orf19.6239		0	5	58.2059
orf19.6240		1	5	-1.28853
orf19.6249	HAK1	4	12	1.55216
orf19.6250		1	18	6.2439
orf19.6252		13	4	-2.51343
orf19.6257	GLT1	6	40	4.72923
orf19.6261	BPH1	816	1542	2.56724
orf19.6267		127	76	1.03401
orf19.6282		49	101	5.19594
orf19.6284		4	33	8.66621
orf19.6295	MAS2	3	9	3.75104
orf19.6296	VPS22	0	8	5.35494
orf19.6298	SPB4	1	6	16.2976
orf19.6302	PGA39	2	9	20.9541
orf19.6309	MSS11	0	52	62.8623
orf19.6313	MNT4	10	31	6.57979
orf19.6316		3	22	3.94009
orf19.6336	PGA25	3	11	3.5819
orf19.634		10	20	2.76062
orf19.6340		2	7	2.14914
orf19.6341		2	22	26.6404
orf19.6343	FEN1	13	5	1.70801
orf19.6347		3	19	9.24827
orf19.6348		0	5	7.85779
orf19.6349	RVS162	20	50	3.9289
orf19.635		15	20	9.5975
orf19.6350		1	5	3.49235
orf19.6351		1	4	15.1335
orf19.6353		4	8	2.22241
orf19.6369	RIO2	6	24	7.37274
orf19.6371		1	13	9.31294
orf19.638	FDH1	1	4	22.1182
orf19.6382		193	230	1.76495
orf19.6398		58	146	2.70784
orf19.6411		2	5	5.69124
orf19.6414.3	TPM2	21	41	1.87552
orf19.6416		58	164	4.16001
orf19.642		14	50	3.05581
orf19.6425	SKI2	19	36	2.32823
orf19.6431		37	109	2.32823
orf19.6432		0	9	16.2976
orf19.6434	PEX19	2	14	1.97629
orf19.6438		0	5	2.61926
orf19.644	HGT9	8	13	1.81085
orf19.6448		5	11	2.25063
orf19.6456		34	8	-1.5969
orf19.6457		3	19	5.82059
orf19.6472	CYP1	12	24	4.7496
orf19.6476		219	202	1.24289
orf19.6478	YCF1	18	153	8.26523
orf19.6479	SEC1	103	208	2.31302
orf19.6481	YPS7	14	21	3.29833
orf19.6484		8	24	3.98251
orf19.6486	LDG3	8	1	1.29346
orf19.6488		15	6	1.22879
orf19.6508		1	14	44.2365
orf19.651	LYP1	0	11	6.16982
orf19.6512	EXO7	4	15	4.39778
orf19.6514	CUP9	37	52	1.6815
orf19.6520		182	66	-1.59762
orf19.6522		2	8	6.9847
orf19.6526		8	29	5.94993
orf19.6531	NUC2	2	8	20.4885
orf19.6539		47	62	2.15668
orf19.6541	RPL5	25	48	2.99617
orf19.656	DPP1	1	4	4.36544
orf19.6561	LAT1	6	12	3.74181
orf19.6566		23	67	7.38922
orf19.6574	ALK6	0	5	14.7455
orf19.6579		0	10	20.3721
orf19.658	GIN1	9	34	6.07366
orf19.6581		10	35	3.99126
orf19.6583		4	8	6.02847
orf19.6586		4	18	5.43255
orf19.6587	GIR2	123	283	3.05101
orf19.6588	NBP2	25	1653	48.2844
orf19.6592		26	55	2.67747
orf19.6596		9	20	20.2007
orf19.6598	WAL1	0	10	12.4878
orf19.6604		27	12	2.83567
orf19.6605		15	30	4.65647
orf19.6606		1	4	3.32605
orf19.6608		3	9	3.28069
orf19.6610		18	40	3.4548
orf19.663	GIN4	8	30	5.1112
orf19.6634	VMA2	19	35	2.72965
orf19.6636		15	34	2.58587
orf19.6637		0	40	119.904
orf19.6649	BRF1	6	0	-12.1981
orf19.6658		4	9	2.60214
orf19.666		88	45	-1.23982
orf19.6661		6	19	5.72868
orf19.6670	CAC2	0	6	33.7594
orf19.6673	HEX1	1	6	7.15101
orf19.6681		15	24	1.76773
orf19.669	PRM1	2	12	2.63867
orf19.6690		2	5	2.16193
orf19.6698		8	32	5.07223
orf19.670.2		1	6	7.64991
orf19.6701		286	40	-3.53272
orf19.6703		79	123	2.56257
orf19.6704		1	14	12.1068
orf19.6712		1	4	3.10431
orf19.6719		8	34	4.63408
orf19.672		37	95	3.20554
orf19.6737		4	10	2.64572
orf19.6738	VAN1	0	10	26.1926
orf19.6739		3	14	1.22012
orf19.6742		18	52	2.94785
orf19.675		28	54	4.00974
orf19.6753		25	4	1.94672
orf19.6755	DLD2	0	6	6.79068
orf19.6770		3	23	6.20863
orf19.6773	ECM29	9	24	5.17386
orf19.6779	PRO2	89	209	5.92124
orf19.6780	MET8	2	29	18.0438
orf19.6781	ZFU2	0	5	14.6346
orf19.6785	RPS12	11	36	3.38652
orf19.6786		4	66	25.7818
orf19.6790		2	6	7.27573
orf19.6797		41	83	3.36139
orf19.6804		12	53	3.74846
orf19.6821		8	21	5.23853
orf19.6826	SLF1	4	14	3.72518
orf19.6829		3	7	10.8651
orf19.6832		3	23	16.9961
orf19.6845		25	51	2.92692
orf19.6846	PHO85	5	15	2.5278
orf19.6861		2	23	12.6113
orf19.6869		2	17	7.46975
orf19.687.1	RPL25	0	14	22.1182
orf19.6872		0	8	11.793
orf19.6880	COG4	0	6	20.9541
orf19.6886		5	14	1.81602
orf19.6888		0	9	13.4705
orf19.6891	RFC1	11	20	3.41474
orf19.6898.1		70	73	2.55039
orf19.69.2		1	4	2.57769
orf19.6900		4	22	8.14882
orf19.6907		8	17	10.1666
orf19.6912		0	17	7.42627
orf19.6915	MRE11	15	20	4.47021
orf19.6918		10	17	1.45949
orf19.6919		4	33	22.2973
orf19.6923		1	25	19.2079
orf19.6925	HTB1	5	19	1.68797
orf19.6926	CSC25	0	5	1.62976
orf19.693		82	99	-1.06939
orf19.6931		1	12	13.5038
orf19.6936	RAD53	2	9	4.05113
orf19.6949		2	10	3.5819
orf19.695	RGS2	1	4	2.71627
orf19.6950		8	67	11.6412
orf19.6953	IRS4	3	8	5.52956
orf19.696	STE2	7	14	4.28885
orf19.697		4	16	6.4858
orf19.6970		11	48	5.21081
orf19.6973		1	7	5.23853
orf19.6976		164	219	1.73713
orf19.6977	GPI1	3	10	3.91567
orf19.6980		1	9	9.31294
orf19.6982		5	9	19.3049
orf19.6986		0	13	15.9096
orf19.6991	PRE3	4	11	2.81328
orf19.6995	ATO6	9	38	2.22916
orf19.6996	MNN14	6	12	2.91029
orf19.6999		33	86	2.85008
orf19.7002		1	6	6.28623
orf19.7010		59	282	5.26121
orf19.7017	YOX1	3	20	7.916
orf19.7027		3	20	13.1933
orf19.7030	SSR1	39	247	7.36209
orf19.7032		85	418	5.65428
orf19.7037	YAE1	20	32	1.87172
orf19.7038		2	6	3.5755
orf19.7044	RIM15	12	31	4.67411
orf19.7056		155	169	1.68614
orf19.706	NMD3	2	14	11.0591
orf19.707	APG7	1	8	23.4487
orf19.7071	FGR2	10	3	2.29497
orf19.7079		2	7	18.9169
orf19.708		15	33	1.30739
orf19.7081	SPL1	6	14	1.29716
orf19.7084	DFI1	4	8	4.83405
orf19.7086		8	16	4.46245
orf19.709	PUP2	28	38	1.88403
orf19.7096		8	2	-2.57706
orf19.7105	FAR1	25	48	2.08499
orf19.7108		1	4	-1.12746
orf19.711		0	5	9.11892
orf19.7119	RAD3	1	7	9.60397
orf19.7125		14	36	2.53989
orf19.714		14	4	-1.46938
orf19.7159		3	28	25.3334
orf19.7177	KAP12	17	28	2.04724
orf19.7178	PRE5	39	85	2.10188
orf19.718	RRN11	4	23	3.36981
orf19.7181		1	13	19.2079
orf19.719		2	12	8.01187
orf19.7190	OGG1	15	21	3.67425
orf19.7194		0	14	16.5887
orf19.7204		2	5	11.6412
orf19.7205	DUR7	4	21	7.37274
orf19.7212		6	26	7.85779
orf19.7214		1	18	3.85614
orf19.7216	YPT52	8	1	-12.8853
orf19.7217	RPL4B	3	7	3.6511
orf19.7224		4	14	3.68371
orf19.7235		18	29	3.32199
orf19.7239	MDG1	33	49	2.00228
orf19.7281	PDK2	312	356	1.61889
orf19.7282	PEX13	68	86	1.42419
orf19.7285		20	3	-1.897
orf19.729.1	RGD3	8	13	-1.00957
orf19.7297		19	5	-1.58983
orf19.7299.1		8	43	10.7438
orf19.7300		1	5	3.49235
orf19.7301		1	4	3.70401
orf19.7307		3	14	6.9847
orf19.7308	TUB1	1	7	6.85536
orf19.731	EMP46	42	186	5.55395
orf19.7314	CDG1	0	6	19.6237
orf19.7319	SUC1	0	5	4.30723
orf19.732		0	7	3.34684
orf19.7326		2	25	5.31129
orf19.7331	FCY24	6	20	4.28229
orf19.7336		0	5	5.82059
orf19.7342	AXL1	7	22	2.19128
orf19.7345		18	166	8.77807
orf19.7353		2	17	9.16742
orf19.7355	SSN8	16	87	1.16682
orf19.7356		3	16	9.83032
orf19.7361		1	5	5.75932
orf19.7364		2	5	7.11405
orf19.7376		2	16	12.8053
orf19.7379	FAA2	3	7	2.32823
orf19.7380		20	47	2.32823
orf19.7383	MNN9	19	26	4.53604
orf19.7387	ELP3	0	7	22.1182
orf19.7391	OCH1	2	6	4.65647
orf19.7396		3	10	4.65647
orf19.74	SEC5	6	28	8.14882
orf19.7406		34	68	2.30293
orf19.7413	MMS21	3	13	3.64419
orf19.7414	ALS6	1	8	7.37274
orf19.7438	UBA1	14	28	2.56106
orf19.7440	HST6	116	219	1.80087
orf19.7447	JEN1	2	14	6.79068
orf19.7449		10	3	2.03721
orf19.7456		7	13	8.22441
orf19.7472	IFF4	3	10	4.65647
orf19.7473		23	28	1.23064
orf19.7483	CRM1	12	21	3.29833
orf19.7490		191	211	1.25672
orf19.7491	RTT19	1	4	4.07441
orf19.7494		0	5	10.4771
orf19.7498	LEU1	28	180	6.18276
orf19.7499		40	145	4.32813
orf19.750		11	34	5.14152
orf19.7510	KIN2	3	9	8.14882
orf19.7513	ALK2	91	92	1.43768
orf19.7518	ZCF38	7	37	6.46732
orf19.7520	POT1	0	7	4.12733
orf19.753	MNN15	23	0	-26.1142
orf19.7537	BNR1	5	15	4.26843
orf19.7538		29	61	1.96696
orf19.754	YBN5	6	11	1.63606
orf19.7545		15	56	6.02067
orf19.7546		15	55	5.74783
orf19.7550	IFA14	0	5	14.3574
orf19.7558	YTA6	3	20	4.91516
orf19.7565	GNP3	11	22	1.91879
orf19.7570	UGA3	40	60	1.80109
orf19.7572	SPT7	50	28	1.73125
orf19.7592	FAA4	65	76	1.72192
orf19.7604		219	99	1.05041
orf19.7606		13	40	3.0766
orf19.7614		1	6	8.14882
orf19.762		0	6	11.6412
orf19.7621		1	7	2.06954
orf19.7626	EIF4E	5	9	2.15362
orf19.7627		1	9	4.92511
orf19.7629		1	4	1.61964
orf19.7670		16	35	2.40584
orf19.773		37	48	1.55624
orf19.775		0	10	36.0876
orf19.779	HAT1	19	28	1.76037
orf19.782		9	21	2.09541
orf19.787.1		40	49	1.78678
orf19.792		1	5	3.3797
orf19.794	SSN3	15	5	-1.05537
orf19.795	VPS36	1	9	18.9169
orf19.797	BAT21	3	9	6.72601
orf19.802	UGA1	2	40	41.7142
orf19.807	CHS5	42	49	1.12774
orf19.810		21	9	-1.15354
orf19.814	SSY1	4	13	4.21993
orf19.816	DCK2	25	75	1.97443
orf19.820	SDS22	23	29	3.93472
orf19.823		6	0	-5.44046
orf19.832	GPI13	0	14	7.21106
orf19.834		12	18	2.66084
orf19.836.1		10	28	3.67861
orf19.837.1	INO4	6	13	13.7615
orf19.849		0	8	11.9322
orf19.851		5	23	11.874
orf19.853	SAP99	0	10	32.5953
orf19.857	FMO2	0	7	22.1182
orf19.86		5	19	3.28692
orf19.864		45	77	2.16845
orf19.867		32	82	4.17019
orf19.868	ADAEC	10	30	3.16899
orf19.891		233	64	-2.70432
orf19.893	PGA17	85	113	1.50559
orf19.895	HOG1	16	3	-5.89042
orf19.897	VPS2	1	12	24.8345
orf19.900	NSP1	0	5	3.0073
orf19.905	AVT7	71	103	1.94788
orf19.915		9	18	1.55216
orf19.916		19	57	4.19082
orf19.921	HMS1	15	22	1.86964
orf19.922	ERG11	40	59	2.30541
orf19.925	SAM51	60	136	2.99344
orf19.929		3	9	7.79453
orf19.931		2	13	5.4624
orf19.936		30	52	1.73264
orf19.938		3	10	11.874
orf19.94		1	4	6.9847
orf19.942	KRE62	8	17	2.53274
orf19.947	MRP17	2	6	7.21753
orf19.949		1	4	10.4771
orf19.953.1	COF1	34	75	2.7493
orf19.956		16	22	3.05997
orf19.961.2		162	200	1.51741
orf19.966	DUS4	2	119	90.4131
orf19.971	SKN7	1	5	4.42365
orf19.974	ROT2	2	6	1.82933
orf19.991	DJP1	66	76	1.80967
orf19.992	LKH1	6	15	4.15756
orf19.994		20	43	2.21841
RB2-5a		4	18	2.32823
rho-3c		3	198	66.8203
snR10b		3	67	17.2955
snR189d		1	8	2.91029
snR52	SNR52	10	27	2.21182
snR5d		3	12	-1.20644
snR67		5	49	9.73202
Tca13-6		0	12	2.31298
tE(UUC)1	tE(UUC)1	1	8	6.47249
tG(GCC)6	tG(GCC)6	22	1	-79.6867
tH(GUG)3	tH(GUG)3	4	18	1.9402
theta-7a		12	1	-2.50547
tP(UGG)1	tP(UGG)1	5	0	-1.16922
tQ(CUG)1	tQ(CUG)1	0	11	19.79
tY(GUA)2	tY(GUA)2	0	6	-4.27512
zeta-6b		10	2	-2.20891
CaalfMr16	RRNL	182070	74686	-2.14053
CaalfMr17	RRNS	43451	23730	-2.44712
orf19.1069	RPN4	49	184	4.49438
orf19.1078	HBR2	48	251	11.0175
orf19.1084	CDC39	197	265	2.05799
orf19.1096		9	32	3.04173
orf19.1121		13	32	4.28885
orf19.1133	MSB1	19	102	4.43473
orf19.1153	GAD1	263	111	-1.99457
orf19.1161	PLD1	109	201	2.34386
orf19.1187	CPH2	222	207	1.25259
orf19.1189		127	180	1.77641
orf19.119		21	28	2.06273
orf19.1193	GNP1	741	363	-1.51886
orf19.1214		50	131	3.41602
orf19.1251	BRN1	15	24	3.16494
orf19.1252	YME1	245	306	1.49166
orf19.1283	MEC1	34	67	4.84125
orf19.1288	FOX2	503	282	-1.20023
orf19.1298	NUP84	12	53	3.51474
orf19.1359		10	44	9.53468
orf19.1375	LEU42	114	622	7.30584
orf19.1378	SUP35	45	130	2.24071
orf19.1389		43	66	3.78726
orf19.139	TRA1	252	408	4.40388
orf19.1414		2	22	3.80577
orf19.144	SNU114	24	97	4.10028
orf19.1468	CDC55	54	1498	10.283
orf19.1479		19	27	2.2959
orf19.1490	MSB2	271	349	1.74084
orf19.1504		50	24	-1.60838
orf19.1507	AMN1	14	21	1.82555
orf19.1510	SRD1	17	57	4.47021
orf19.1513	FAB1	156	312	2.40099
orf19.1532	SAM37	0	6	1.64917
orf19.1539		28	7	-2.57706
orf19.1563	ECM3	11	48	2.87854
orf19.1601	RPL3	269	724	3.18854
orf19.1607	ALR1	73	300	4.90817
orf19.1618	GFA1	219	213	1.60821
orf19.1623	CAP1	14	73	5.60355
orf19.1631	ERG6	5	67	4.81378
orf19.1633	UTP4	2	85	5.45297
orf19.1658		41	96	1.72827
orf19.1672		235	322	2.0969
orf19.1680	TFP1	71	122	1.90438
orf19.1690	TOS1	102	637	5.60736
orf19.1712	GEA2	46	165	4.76629
orf19.1727	PMC1	329	473	1.932
orf19.173		142	62	-1.31338
orf19.1738	UGP1	39	44	1.81977
orf19.176	OPT4	87	760	8.24276
orf19.1797		13	5	1.44805
orf19.1826	MDM34	339	95	-2.16695
orf19.1843	ALG6	3	43	3.53249
orf19.1860	LSC2	43	78	2.66206
orf19.1893		56	71	1.38046
orf19.1945	AUR1	60	74	2.242
orf19.1971	TRY3	2	22	-3.01601
orf19.20	RTS1	110	64	-1.42929
orf19.2003	HNM1	81	366	19.7062
orf19.2005	REG1	392	174	-1.43381
orf19.2013	KAR2	446	843	2.61032
orf19.2021	HGT8	261	296	1.42545
orf19.2077	ZCF9	11	17	3.34051
orf19.2151	NAG6	74	42	1.10912
orf19.216		10	22	1.67026
orf19.2163		105	145	1.3486
orf19.2170	PHM7	244	658	2.60762
orf19.2182	BLM3	236	390	2.11852
orf19.2192	GDH2	1683	218	-4.70099
orf19.2242	PRB1	37	123	2.83705
orf19.2290	TOR1	242	310	-1.00744
orf19.2299		15	5	1.16412
orf19.2340	CDC48	387	563	1.87302
orf19.2365	POL2	31	150	5.62102
orf19.2404		2	22	-2.05105
orf19.2436		14	40	3.12857
orf19.2454	PHO87	8	84	11.6813
orf19.2474	PRC3	78	161	2.35439
orf19.248	APL5	18	76	4.55064
orf19.2485		58	150	2.47898
orf19.251		155	404	3.13154
orf19.2551	MET6	424	1642	4.4188
orf19.2573	FRS1	37	226	5.12639
orf19.2574		27	69	1.24801
orf19.2606	HDA1	12	75	6.27792
orf19.2613	ECM4	148	74	-1.69136
orf19.2629	USO1	89	139	1.82378
orf19.2690		36	43	1.70631
orf19.2697		47	115	2.68895
orf19.2711		16	105	3.9543
orf19.272	FAA21	49	145	6.90622
orf19.2724		88	43	-1.01061
orf19.2747	RGT1	49	53	1.56198
orf19.2752	ADR1	143	79	-1.06694
orf19.2768	AMS1	629	1499	2.67044
orf19.2808	ZCF16	22	40	1.43803
orf19.2809	CTN3	162	99	-2.03242
orf19.2825	DRE2	18	147	8.69208
orf19.2832	INN1	45	19	1.11561
orf19.2850		56	170	3.57795
orf19.2881	MNN4	147	488	3.74572
orf19.2884	CDC68	43	91	2.52086
orf19.2893		8	52	3.79416
orf19.2897	SOU2	19	2	-1.92016
orf19.2942	DIP5	1712	778	-1.56101
orf19.3002	RPS1	146	239	1.97522
orf19.3019		0	20	2.36981
orf19.3038	TPS2	466	106	-2.94115
orf19.3047		84	44	-1.25316
orf19.3080		31	62	1.88154
orf19.3098		56	122	2.34141
orf19.3149	LSP1	232	270	1.82305
orf19.3153	MSS4	27	83	6.40934
orf19.3174	CDC24	36	48	1.65563
orf19.3185		7	15	2.3954
orf19.3187	ZNC1	52	71	1.93362
orf19.3195	HIP1	57	155	4.13539
orf19.3221	CPA2	10	152	3.97877
orf19.3223	ATP3	55	87	1.87777
orf19.3241		31	39	1.48854
orf19.3247		78	256	3.74181
orf19.3260		36	105	5.38874
orf19.3325		73	121	2.60291
orf19.3342		32	14	1.10062
orf19.3356	ESP1	11	60	4.34305
orf19.3360		95	102	1.52341
orf19.338		522	219	-1.74918
orf19.3422	FMP27	238	78	-1.6945
orf19.3425		22	33	1.18694
orf19.3426	ANB1	122	360	4.17325
orf19.3430		58	96	2.63729
orf19.3431		37	86	2.34463
orf19.346	ALT1	31	62	1.69495
orf19.349		7	35	5.07038
orf19.3496	CHC1	443	315	-1.12845
orf19.35.1		16	29	3.02671
orf19.3518		41	59	2.24357
orf19.3523	CRK1	7	35	1.95783
orf19.3527	CYT1	164	350	3.26232
orf19.3555	BUD14	69	91	1.73324
orf19.3568	RXT3	39	49	2.54315
orf19.3573	PEX6	90	50	-1.23251
orf19.36		1	14	2.32823
orf19.36.1		33	15	-1.78962
orf19.3616	ERG9	15	55	2.27532
orf19.3642	SUN41	122	160	1.685
orf19.3651	PGK1	1064	241	-2.23817
orf19.3658		1	5	2.03721
orf19.3669	SHA3	190	94	-1.12884
orf19.3670	GAL1	183	78	-1.75268
orf19.3672	GAL1	64	25	-1.86963
orf19.3681		45	362	7.91236
orf19.3685	PSY2	4	20	1.03789
orf19.3775	SSK2	98	266	13.146
orf19.3794	CSR1	10	19	1.60759
orf19.3829	PHR1	157	253	2.55509
orf19.3923	PGA37	17	1	-1.11167
orf19.3936		55	122	2.17001
orf19.3954	PSD2	26	41	2.86373
orf19.3969	SFL2	89	52	1.16412
orf19.3974	PUT2	30	61	1.54669
orf19.3988		31	8	-2.02483
orf19.4066		51	66	1.74618
orf19.4119	SPO72	55	226	3.3386
orf19.4123		107	187	1.82446
orf19.4278		20	60	3.2487
orf19.4336	RPS5	9	17	1.65739
orf19.4346		124	146	1.41419
orf19.437	GRS1	41	320	8.02513
orf19.4393	CIT1	1758	2725	1.84893
orf19.4451	RIA1	37	340	2.26423
orf19.449		276	25	-2.09601
orf19.4495	NDH51	181	645	5.46679
orf19.4527	HGT1	1414	847	-1.41953
orf19.4553		32	120	3.86701
orf19.4555	ALS4	1090	775	-1.08094
orf19.4577		4	21	4.46245
orf19.4618	FBA1	257	74	-1.96882
orf19.4631	ERG251	51	19	1.42281
orf19.4633		5	18	4.12638
orf19.4657		104	42	-1.63214
orf19.467	WOR3	63	66	1.37431
orf19.4686		54	343	6.79593
orf19.4732	SEC24	122	119	1.01636
orf19.4736		57	80	2.21466
orf19.4765	PGA6	13	49	6.47857
orf19.48	RPM2	107	178	2.67218
orf19.4831	MTS1	64	147	2.78732
orf19.4858	VPS41	24	39	2.23869
orf19.4900	MNN12	123	145	1.55675
orf19.492	ADE17	70	165	1.79287
orf19.4924		15	65	3.41725
orf19.4931		22	79	-1.18792
orf19.4936.1		49	24	1.14387
orf19.4950	AKR1	22	35	-2.06148
orf19.4961	STP2	106	27	-1.04136
orf19.4993	SEC18	54	252	5.25793
orf19.5005	OSM2	186	25	-4.30208
orf19.5024	GND1	423	519	1.47888
orf19.5031	SSK1	9	40	4.89732
orf19.5040		21	38	2.7391
orf19.505	SRV2	9	19	5.07223
orf19.5102	PLB5	24	85	3.25953
orf19.5107	NOT5	55	77	1.74618
orf19.5117	OLE1	1716	731	-2.00258
orf19.5118	SDS24	317	100	-2.18255
orf19.5148	CYR1	100	200	2.64056
orf19.5160		28	109	3.97076
orf19.5180	PRX1	90	25	-1.4317
orf19.5188	CHS1	69	96	2.18385
orf19.5214	VPS33	4	23	1.85911
orf19.5219	IRA2	326	455	1.7023
orf19.522	PIM1	62	93	1.69944
orf19.5238		24	50	2.50395
orf19.5255	PXA2	24	42	2.85538
orf19.5260	RPN2	142	79	-1.17522
orf19.528	SEC26	151	186	1.07199
orf19.5281		145	316	2.42044
orf19.5282		149	54	-2.61053
orf19.5288	IFE2	153	6	-5.24616
orf19.5293		20	100	5.17772
orf19.5294	PDB1	31	140	4.024
orf19.5328	GCN1	143	637	1.73663
orf19.5380	LYS144	5	14	2.50733
orf19.54	RHD1	4	17	2.69585
orf19.5493	GSP1	7	36	2.99518
orf19.5530	NAB3	20	60	1.72087
orf19.5544	SAC6	73	42	-1.177
orf19.5591	ADO1	17	23	3.3145
orf19.5626		71	34	-1.39435
orf19.5640	PEX5	28	11	-2.67523
orf19.5653	ATP2	666	963	1.9857
orf19.5664	HOF1	28	8	1.65887
orf19.5710		59	133	2.12519
orf19.5711		27	102	3.76099
orf19.5732	NOG2	367	336	1.86259
orf19.575	HYR3	157	228	1.868
orf19.5770	OPT8	14	28	2.07452
orf19.5776	TOM1	526	837	1.8788
orf19.5792	SMP3	0	10	1.979
orf19.583		21	29	1.52671
orf19.5854	SBP1	215	281	1.62271
orf19.5855	MBP1	7	24	3.68011
orf19.5921		25	59	2.65564
orf19.5943.1		14	42	1.61063
orf19.5956	PIN3	24	5	-1.99514
orf19.5964	ARF2	79	136	2.79388
orf19.5999	DYN1	312	312	1.2541
orf19.6000	CDR1	680	1902	3.37752
orf19.6018	LRO1	29	148	5.07979
orf19.6064		8	1	1.31336
orf19.607		104	103	1.36512
orf19.6070	ENA2	833	326	-2.03389
orf19.6082		7	18	2.353
orf19.6092	KEL1	43	20	-1.36662
orf19.6117		3	17	3.81831
orf19.6126	KGD2	129	289	2.74228
orf19.6127	LPD1	53	117	1.68042
orf19.6139	FRE7	187	89	1.11496
orf19.6214	ATC1	87	32	-2.09983
orf19.6245		56	443	7.79774
orf19.6247		10	15	3.98053
orf19.6253	RPS23A	19	216	6.07252
orf19.6260		57	180	3.93886
orf19.6269		7	18	3.03964
orf19.6274	PBR1	2	11	5.3032
orf19.6310		29	87	6.00319
orf19.6312	RPS3	75	524	5.61444
orf19.6324	VID27	48	57	1.38239
orf19.6373	DCP2	37	9	-1.49748
orf19.6376	PTC5	117	28	1.96367
orf19.6387	HSP14	231	139	-1.45116
orf19.6396		72	98	1.89751
orf19.6407		2	8	4.07441
orf19.6453		9	41	3.55887
orf19.649		91	154	1.89885
orf19.6506		13	48	3.76259
orf19.6534.2	CRN1	23	11	-1.28853
orf19.6540	PFK2	234	103	-1.58241
orf19.6601		14	91	4.95884
orf19.6601.1	YKE2	1	8	2.50733
orf19.6706	GYP7	114	34	-1.53257
orf19.6741		26	3	-1.28853
orf19.6778		58	106	2.77295
orf19.6789		15	55	4.07441
orf19.6793		34	44	2.24702
orf19.6801	RPD31	5	20	3.60149
orf19.6810		37	87	2.96321
orf19.6814	TDH3	1339	443	-1.64984
orf19.6816		31	14	-1.13391
orf19.6834.10	TAR1	13973	7047	1.66913
orf19.6854	ATP1	923	1692	2.48308
orf19.6863	VPH1	132	166	1.8517
orf19.6873	RPS8A	32	47	1.36148
orf19.6875	VPS35	68	73	1.56237
orf19.6877	PNG2	205	86	-1.42609
orf19.6882	OSM1	68	21	-1.35226
orf19.6889	MKK2	15	46	7.62497
orf19.6941		64	70	2.28943
orf19.6951		10	28	4.74602
orf19.6975	YST1	156	591	3.80041
orf19.6979		76	157	4.4867
orf19.6994	BAT22	86	1100	13.5461
orf19.7001	YCK2	70	101	4.02466
orf19.7006		83	113	1.55842
orf19.7020		20	58	2.67747
orf19.7021	GPH1	751	297	-2.04072
orf19.7029		7	27	4.5145
orf19.7034		34	87	7.19463
orf19.7067		35	49	1.71272
orf19.7100		6	24	9.93977
orf19.7101		8	26	6.51906
orf19.7112	FRP2	3	13	-1.28853
orf19.7114	CSA1	52	28	-1.57078
orf19.7115	SAC7	24	11	1.19475
orf19.7136	SPT6	143	259	2.11204
orf19.7156	FAA2-3	35	14	-1.34818
orf19.716		33	179	4.75701
orf19.7196		94	292	3.71384
orf19.7201	SLA2	68	85	4.02034
orf19.7213		15	100	3.17894
orf19.7222	PAM16	9	52	-1.90868
orf19.7223		5	38	-1.30116
orf19.7229	IML2	33	53	2.40584
orf19.7247	RIM11	547	141	-2.72546
orf19.7251	WSC4	36	10	-1.76576
orf19.7270		52	59	2.18483
orf19.7293	MPS1	8	25	1.69898
orf19.7298	CHS2	62	171	3.93283
orf19.730		27	7	-1.45174
orf19.7363	KRE6	41	237	11.0591
orf19.7381	AHR1	60	109	2.81435
orf19.7389	REV3	38	56	2.17872
orf19.740	HAP41	114	178	3.83757
orf19.7511		106	146	2.07926
orf19.7566		1024	597	-1.27749
orf19.759	SEC21	87	112	1.92037
orf19.7654	CPR6	15	63	4.16966
orf19.7655	RPO21	202	335	1.92178
orf19.767	ERG3	39	60	8.7199
orf19.778	PIL1	614	176	-1.36903
orf19.831		6	13	4.57332
orf19.843		11	23	1.6603
orf19.88	ILV5	102	851	9.30718
orf19.881	DFG16	7	32	3.56083
orf19.913.2		76	194	2.40054
orf19.92		114	175	1.74247
orf19.940	BUD2	39	115	3.97966
orf19.976	BRE1	115	61	-1.17686
orf19.978	BDF1	114	154	1.67402
orf19.980		40	98	2.02121
orf19.986	GLY1	26	60	7.27195
RDN18	RDN18	1554349	1093920	-1.34304
RDN5	RDN5	39193	26144	-1.28718
snR31a		76	22	-2.42366
snR62		21	3	-1.1755
Tca9-R		616	143	-4.57795
tE(UUC)5	tE(UUC)5	90	3	-21.3744
