# Supplementary material for: The Absence of N-Acetyl-D-glucosamine Causes Attenuation of Virulence of Candida albicans upon Interaction with Vaginal Epithelial Cells In Vitro
Source: Biomed Res Int. 2015 Aug 20;2015:398045. doi: 10.1155/2015/398045 (PMC4558442; doi:10.1155/2015/398045)
Supplement: Supplementary file 1 — RNA seq data was analyzed and differentially expressed genes between the C.a.3h vs. C.a.0h, PK+C.a.3h vs. C.a.0h and PK+C.a.3h vs. C.a.3h samples were listed. Since the hyphal form of C. albicans is pathogenic, genes with altered expression upon hyphal growth were collected. Our gene expression analysis revealed that the expression of genes involved in the glyoxylate cycle and fatty acid beta-oxidation in C. albicans were upregulated. [file 398045.f1.zip › sup/BMRI Manczinger et al Table S3.xls]

## Sheet: oligos
Gene	5'-3' sequence
18S_5	TCTTAGTTGGTGGAGTGATTTGT
18S_3	GACCTGTTATTGCCTCAAACTT
CHS8_5	AATCCGTTAGTGGCAGCACA
CHS8_3	AAAGCCCCTGTCAACACACT
HOG1_5	CGGGTTACGTGTCAACCAGA
HOG1_3	CCCGGGGAATAGTGGTTTCC
CDC53_5	AGAACAAGGTGTTACCGCCA
CDC53_3	ATCTCAGCACCAGCAAGTGA
FRE3_5	AGTCGAGAACTTGCGACAGG
FRE3_3	CCATCATCGGGTGTCCACAA
SAP2_5	CCAATGAAGCCGGTGGTAGT
SAP2_3	TATTTGTCCCGTGGCAGCAT
DAG7_5	CTGCTGCTGCAAACACAGATG
DAG7_3	ACAGAACTTGGAGCACTAGCC
CCN1_5	AATGGTTCCGGTAACCCCAC
CCN1_3	GGTTGAGGTGGAGCAAATGA
SSR1_5	GCTGCTCCACCAGCTTGTTT
SSR1_3	GCATCACCATTTGGACAAATCTCT
ASG1_5	GATTCACAAATACCGCCACCG
ASG1_3	CCAACTTCACGAGGTGACGA
EBP7_5	CAATTGATGCAGGCAACCCA
EBP7_3	TGGCACCGTGCAATTCAATA
NGT1_5	TGCTATTTATGCCGGCTCGT
NGT1_3	GGTTCCTTGAGCTGCCCATA
PGA17_5	ACACCGCTTCATTGGCTGTA
PGA17_3	ACATTGGTTACTTGGGCGGT
PRY1_5	CTGCTCCTGCTGCTAATGCT
PRY1_3	TTTGAGGGGCACTAGAGGCT
UPF1_5	TGGGACACTAGTGAATGGCAGGCA
UPF1_3	TTGGAGGAGGTGCCAACCACG
UPF2_5	GCCGCCATGGAAATTGTTTCTGC
UPF2_3	TCACTTGGGTGGGACCTGGGT
ARX1_5	TCGCCCACCCAACAACAATA
ARX1_3	ACCCTCTGGTTTGGCATCTG
MUP1_5	TAAAGCTGCTGCCGTTTTCG
MUP1_3	TGAATCACCTGGTGGAACGG
GDA1_5	AAGGAGCCAAAGCCACTGTT
GDA1_3	TTGAGAACCACCGGCTACTG
GCN4_5	CCTTCATCCACTTTACCAACACC
GCN4_3	ACGAGCTCTGGATCTTCTAGC
EAP1_5	CCAGGTACTCCAGGCACTGA
EAP1_3	TGGAACACATCCACCTTCGG
TES2_5	TTGCCAGTGGCGGATGTAAA
TES2_3	GCTGGTGGAAATCACCCTCA
FOX2_5	TGGACGGTCAAGGTGGTAAC
FOX2_3	GTTCAAATGAACGTCGATAACCA
orf19.4783_5	GCT TCC ACA GCA AGT TTC CG
orf19.4783_3	ACC TTG CTT CTG TTT GTG GC
GIG1_5	CTC AAT TGC AAA CCC CAC CC
GIG1_3	GCT GTC GTG ATC GAG CAA AG
DAC1_5	GGG GTT ACT GCT ACG TGT CC
DAC1_3	CAA ACG TTT CGA CTG GGT GG
NAG1_5	CCC ATC TGA CTT GCA GTC GT
NAG1_3	GAT CCC GCT TCG TTG AAT GC
HXK1_5	CGT TCC CGT TGG AAA CAA CC
HXK1_3	AGC ACC CAG CAG AAT ACA CC
